# Supplementary material for: Oxidative Ring Opening of Benzocyclobutenone Oximes: Novel Access to Stable Nitrile Oxides
Source: Oxford University Press journal article supplement (doi:10.1246/cl.170328), 2017-06-08
Supplement: cl_170328supp.pdf [file cl_170328supp.pdf]

**Supporting Information**

# Chemistry Letters

## **Oxidative Ring Opening of Benzocyclobutenone Oximes: Novel Access to Stable Nitrile Oxides**

Hiroshi Takikawa, Shogo Sato, Ryota Seki, and Keisuke Suzuki\*

*Department of Chemistry, Tokyo Institute of Technology, 2-12-1 O-okayama, Meguro-ku, Tokyo 152-8551*

(Received April 2, 2017; CL-170328; E-mail: ksuzuki@chem.titech.ac.jp)

## General experimental procedures

All reactions utilizing air- or moisture-sensitive reagents were performed in dried glassware under an atmosphere of dry argon. Ethereal solvents (anhydrous; *Kanto Chemical Co., Inc.*) were used as received. MeOH was distilled from MgSO<sub>4</sub>, and stored over 4A molecular sieves. Other reagents were used without further purification as received from commercial. For thin-layer chromatography (TLC) analysis, Merck pre-coated plates (TLC silica gel 60 F254, Art 5715, 0.25 nm) were used. Silica-gel preparative thin-layer chromatography (PTLC) was performed using plates prepared from Merck silica gel 60 PF254 (Art 7747). For flash column chromatography, silica gel 60N (Spherical, neutral, 63–210 μm) from Kanto Chemical was used. Melting point (mp) determinations were performed using a Yanaco MP-500 instrument or METTLER TOLEDO MP70 melting point system, and are uncorrected. <sup>1</sup>H- and <sup>13</sup>C-NMR were measured on a Bruker Avance III (600 MHz) spectrometer in the solvent indicated; Chemical shifts (δ) are expressed in parts per million (ppm) downfield from internal standard (tetramethylsilane, 0.00 ppm), and coupling constants (*J*) are reported as hertz (Hz). Splitting patterns are indicated as follows: s = singlet, d = doublet, t = triplet, q = quartet, m = multiplet, br = broad. Infrared (IR) spectra were recorded on a Thermo Scientific Nicolet iS5 FT-IR spectrometer. Attenuated total reflectance Fourier transform infrared (ATR-FTIR) spectra were recorded by using a Thermo Scientific Nicolet iS5 FT-IR spectrometer equipped with a universal ATR sampling accessory (iD5 ATR). Elemental analyses were recorded on an Elementar vario MICRO cube analyzer. High-resolution mass spectra (HRMS) were obtained with a Bruker micrOTOF-QII spectrometer.

## Equation 1

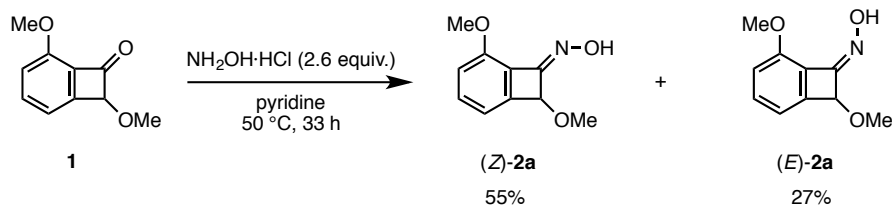

To a solution of benzocyclobutenone **1** (192 mg, 1.08 mmol) in pyridine (5.4 mL) was added  $\text{NH}_2\text{OH}\cdot\text{HCl}$  (113 mg, 1.63 mmol) at  $0\text{ }^\circ\text{C}$ . After stirring for 8 h, the reaction was quenched by adding water, and the mixture was extracted with EtOAc (x3). The combined organic extracts were washed with 10% aqueous  $\text{CuSO}_4$  (x1), water, and brine, dried ( $\text{Na}_2\text{SO}_4$ ), and concentrated in vacuo. The residue was purified by flash column chromatography ( $\text{SiO}_2$ , hexane/EtOAc = 3/1) to give oxime **(Z)-2a** (115 mg, 55%) and oxime **(E)-2a** (55.6 mg, 27%) both as white solids.

Oxime **(Z)-2a**: mp  $144\text{--}145\text{ }^\circ\text{C}$  (hexane/EtOAc, colorless needle);  $R_f$  0.60 (hexane/EtOAc = 1/1);  $^1\text{H NMR}$  (600 MHz, acetone- $d_6$ )  $\delta$  3.45 (s, 3H), 4.03 (s, 3H), 5.59 (s, 1H), 6.91 (d, 1H,  $J = 8.4$  Hz), 7.06 (d, 1H,  $J = 7.2$  Hz), 7.36 (dd, 1H,  $J = 8.4, 7.2$  Hz), 10.02 (s, 1H, OH);  $^{13}\text{C NMR}$  (150 MHz, acetone- $d_6$ )  $\delta$  55.8, 58.3, 83.9, 116.4, 117.8, 126.7, 133.9, 149.8, 154.2, 154.3; **IR** (neat) 3183, 3122, 2997, 2952, 2881, 2830, 1690, 1604, 1485, 1454, 1272, 1134, 1047,  $933\text{ cm}^{-1}$ ; **HRMS** (ESI) calcd for  $\text{C}_{10}\text{H}_{12}\text{NO}_3$  ( $[\text{M}+\text{H}]^+$ )  $m/z$  194.0812, found  $m/z$  194.0813.

Oxime **(E)-2a**: mp  $123\text{--}124\text{ }^\circ\text{C}$  (hexane/EtOAc, colorless needle);  $R_f$  0.37 (hexane/EtOAc = 1/1);  $^1\text{H NMR}$  (600 MHz, acetone- $d_6$ )  $\delta$  3.44 (s, 3H), 3.90 (s, 3H), 5.37 (s, 1H), 7.04 (d, 1H,  $J = 8.4$  Hz), 7.09 (d, 1H,  $J = 7.2$  Hz), 7.48 (dd, 1H,  $J = 8.4, 7.2$  Hz), 9.76 (s, 1H, OH);  $^{13}\text{C NMR}$  (150 MHz, acetone- $d_6$ )  $\delta$  56.3, 56.4, 83.9, 113.8, 116.1, 128.6, 135.0, 150.9, 151.2, 153.3; **IR** (ATR) 3177, 3104, 2988, 2934, 2843, 1697, 1592, 1487, 1281, 1050,  $952\text{ cm}^{-1}$ ; **HRMS** (ESI) calcd for  $\text{C}_{10}\text{H}_{12}\text{NO}_3$  ( $[\text{M}+\text{H}]^+$ )  $m/z$  194.0812, found  $m/z$  194.0816.

Based on the relation of the oximes geometry and  $^{13}\text{C NMR}$  chemical shifts, the structures of **(Z)-2a** and **(E)-2a** were assigned as such by  $^{13}\text{C NMR}$  analysis: The  $\alpha$ -carbon to oxime moiety in **(Z)-2a** resonates at higher fields ( $\delta_{\text{C}}$  82.9) than that of **(E)-2a** ( $\delta_{\text{C}}$  83.3).

In addition, the  $\alpha$ -proton in **(Z)-2a** resonates at lower field ( $\delta_{\text{H}}$  5.74) than that in **(E)-2a** ( $\delta_{\text{H}}$  5.51) due to the deshielding effect of the *N*-hydroxy group.\*

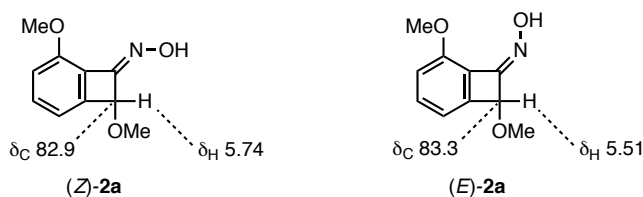

\*For the relation of *E/Z* geometries of oximes and  $^{13}\text{C NMR}$  chemical shifts, see: G. C. Levy, G. L. Nelson, *J. Am. Chem. Soc.* **1972**, *94*, 4897.

## Scheme 2

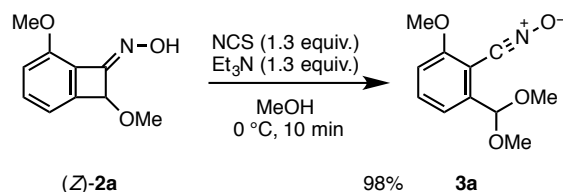

To a solution of oxime (*Z*)-**2a** (57.9 mg, 0.300 mmol) and Et<sub>3</sub>N (55.0 μL, 0.395 mmol) in MeOH (3.0 mL) was added NCS (52.1 mg, 0.390 mmol) at 0 °C. After stirring for 10 min at 0 °C, the reaction was stopped by adding water and brine, and the mixture was extracted with EtOAc (x3). The combined organic extracts were washed with brine, dried (MgSO<sub>4</sub>), and concentrated in vacuo. The residue was purified by flash column chromatography (silica gel, hexane/EtOAc = 4/1) to afford nitrile oxide **3a** (65.9 mg, 98%) as colorless oil (solidified in a refrigerator as a white solid).

*R<sub>f</sub>* 0.66 (hexane/EtOAc/CH<sub>2</sub>Cl<sub>2</sub> = 2/1/1); <sup>1</sup>H NMR (600 MHz, CDCl<sub>3</sub>) δ 3.38 (s, 6H), 3.91 (s, 3H), 5.45 (s, 1H), 6.91 (d, 1H, *J* = 8.4 Hz), 7.21 (d, 1H, *J* = 7.8 Hz), 7.42 (dd, 1H, *J* = 8.4, 7.8 Hz); <sup>13</sup>C NMR (150 MHz, CDCl<sub>3</sub>) δ 33.0, 53.6, 53.7, 56.1, 101.8, 111.1, 119.3, 131.5, 142.7, 161.9; IR (ATR) 2935, 2294, 1471, 1367, 1331, 1277, 1120, 1103, 1050, 990, 932, 815, 777 cm<sup>-1</sup>; HRMS (ESI) calcd for C<sub>11</sub>H<sub>14</sub>NO<sub>4</sub> ([M+H]<sup>+</sup>) *m/z* 224.0917, found *m/z* 224.0921.

**Table 1**

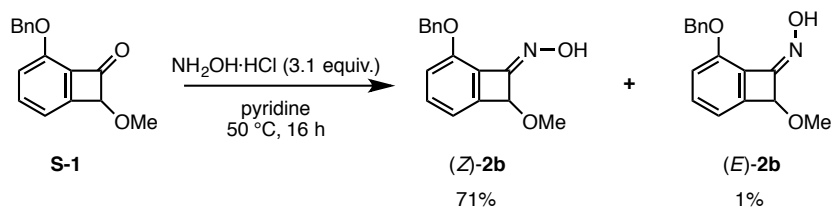

To a solution of benzocyclobutenone **S-1** (3.75 g, 14.7 mmol) in pyridine (49 mL) was added NH<sub>2</sub>OH·HCl (1.22 g, 17.6 mmol). After stirring for 3 h at 50 °C, additional portions of NH<sub>2</sub>OH·HCl (307 mg, 4.42 mmol; 309 mg 4.45 mmol; 1.01 g, 14.5 mmol; 303 mg 4.36 mmol) were added with 3 h intervals until the starting material was consumed. The reaction was stopped by adding 1 M aqueous HCl, and the mixture was extracted with EtOAc (x3). The combined extracts were washed with 1 M aqueous HCl (x2) and brine, dried (Na<sub>2</sub>SO<sub>4</sub>), and concentrated in vacuo. The residue was purified by trituration with hexane to give oxime (*Z*)-**2b** (2.56 g, 64%) as a white solid. The mother liquor was concentrated in vacuo, and the residue was purified by flash column chromatography (silica gel, hexane/EtOAc = 5/2) to give oxime (*Z*)-**2b** (278 mg, 7%; total yield = 71%) and oxime (*E*)-**2b** (46 mg, 1%) both as a white solid. The structures of (*Z*)-**2b** and (*E*)-**2b** were assigned by analogy to oximes (*Z*)-**2a** and (*E*)-**2a**.

Oxime (*Z*)-**2b**: *R<sub>f</sub>* 0.45 (hexane/EtOAc = 2/1); *mp* 117–119 °C (hexane/EtOAc, colorless needle); <sup>1</sup>H NMR (600 MHz, acetone-*d*<sub>6</sub>) δ 3.46 (s, 3H), 5.45 (d, 1H, *J* = 12.0 Hz), 5.50 (d, 1H, *J* = 12.0

Hz), 5.60 (s, 1H), 6.99 (d, 1H,  $J = 8.4$  Hz), 7.08 (d, 1H,  $J = 7.2$  Hz), 7.32 (t, 1H,  $J = 7$ . Hz), 7.36–7.39 (m, 3H), 7.46 (d, 2H,  $J = 7.2$  Hz), 10.15 (s, 1H, OH);  $^{13}\text{C}$  NMR (150 MHz, acetone- $d_6$ )  $\delta$  55.9, 72.6, 83.8, 116.7, 119.0, 127.0, 128.7, 128.8, 129.3, 134.0, 138.3, 149.8, 153.2 154.4; IR (ATR) 3266, 3036, 2924, 2839, 1939, 1688, 1600, 1576, 1484, 1452  $\text{cm}^{-1}$ ; HRMS (ESI) calcd for  $\text{C}_{16}\text{H}_{16}\text{NO}_3$  ( $[\text{M}+\text{H}]^+$ )  $m/z$  270.1125, found  $m/z$  270.1121.

Oxime (*E*)-**2b** [a mixture of (*E*)-**2b** and (*Z*)-**2b** (*E/Z* = 14/1)]; The major isomer (*E*)-**2b** had the following characteristics:  $R_f$  0.13 (hexane/EtOAc = 2/1);  $^1\text{H}$  NMR (600 MHz, acetone- $d_6$ )  $\delta$  3.46 (s, 3H), 5.30 (s, 2H), 5.40 (s, 1H), 7.11 (d, 1H,  $J = 7.2$  Hz), 7.11(d, 1H,  $J = 7.2$  Hz), 7.30 (dd, 1H,  $J = 7.2, 7.2$  Hz), 7.37 (dd, 1 H,  $J = 7.8, 7.8$  Hz), 7.47 (t, 1H,  $J = 7.8$  Hz), 7.57 (d, 2H,  $J = 7.8$  Hz), 9.90 (s, 1H, OH);  $^{13}\text{C}$  NMR (150 MHz, acetone- $d_6$ )  $\delta$  56.5, 71.0, 84.0, 115.6, 116.6, 127.8, 128.4, 129.1, 129.2, 134.9, 138.2, 151.0, 151.3 152.3; IR (ATR) 3292, 3064, 2930, 2829, 1692, 1593, 1483, 1452, 1277, 1053, 938  $\text{cm}^{-1}$ ; HRMS (ESI) calcd for  $\text{C}_{16}\text{H}_{16}\text{NO}_3$  ( $[\text{M}+\text{H}]^+$ )  $m/z$  270.1125, found  $m/z$  270.1122.

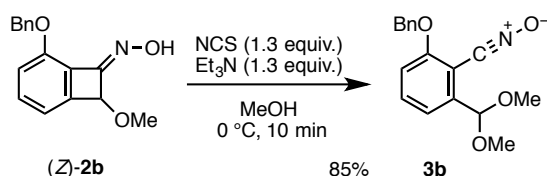

To a solution of oxime (*Z*)-**2b** (80.1 mg, 0.297 mmol) and  $\text{Et}_3\text{N}$  (55.0  $\mu\text{L}$ , 0.395 mmol) in MeOH (3.0 mL) was added NCS (52.1 mg, 0.390 mmol) at 0 °C. After stirring for 10 min at 0 °C, the reaction was stopped by adding water, and the mixture was extracted with EtOAc (x3). The combined organic extracts were washed with brine, dried ( $\text{MgSO}_4$ ), and concentrated in vacuo. The residue was purified by PTLC (hexane/EtOAc/ $\text{CH}_2\text{Cl}_2 = 5/1/1$ ) to give nitrile oxide **3b** (75.7 mg, 85%) as colorless oil.

$R_f$  0.67 (hexane/EtOAc / $\text{CH}_2\text{Cl}_2 = 2/1/1$ );  $^1\text{H}$  NMR (600 MHz,  $\text{CDCl}_3$ )  $\delta$  3.39 (s, 6H), 5.19 (s, 2H), 5.47 (s, 1H), 6.95 (d, 1H,  $J = 8.4$  Hz), 7.22 (d, 1H,  $J = 8.4$  Hz), 7.33–7.44 (m, 6H);  $^{13}\text{C}$  NMR (150 MHz,  $\text{CDCl}_3$ )  $\delta$  53.8, 70.7, 101.8, 102.3, 112.6, 119.5, 127.0, 128.2, 128.8, 131.4, 135.7, 142.9, 160.8 (A signal of the carbon in the nitrile oxide moiety is broadened.); IR (neat): 2934, 2829, 2310, 1275, 1061, 795  $\text{cm}^{-1}$ ; HRMS (ESI) calcd for  $\text{C}_{17}\text{H}_{18}\text{NO}_4$  ( $[\text{M}+\text{H}]^+$ )  $m/z$  300.1230, found  $m/z$  300.1239.

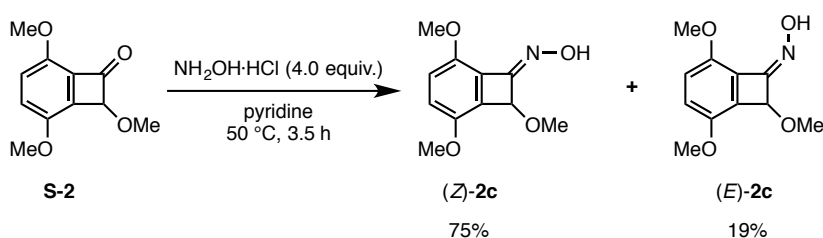

To a solution of benzocyclobutenone **S-2** (700 mg, 3.36 mmol) in pyridine (11 mL) was added  $\text{NH}_2\text{OH}\cdot\text{HCl}$  (933 mg, 13.4 mmol). After stirring for 3.5 h, the reaction was quenched by adding 1 M aqueous HCl, and the mixture was extracted with EtOAc (x3). The combined organic extracts were washed with 1 M aqueous HCl (x3) and brine, dried ( $\text{Na}_2\text{SO}_4$ ), and concentrated in vacuo. The residue was purified by trituration with hexane and EtOAc to give oxime (*Z*)-**2c** (417 mg, 56%) as a white solid. The mother liquor was concentrated in vacuo, and the residue was purified by flash column chromatography (silica gel, hexane/EtOAc = 2/1) to give oxime (*Z*)-**2c** (142 mg, 19%; total yield = 75%) and oxime (*E*)-**2c** (145 mg, 19%) both as a white solid. The structures of (*Z*)-**2c** and (*E*)-**2c** were assigned by analogy to oximes (*Z*)-**2a** and (*E*)-**2a**.

Oxime (*Z*)-**2c**:  $R_f$  0.26 (hexane/EtOAc = 4/1); **mp** 164–166 °C (hexane/EtOAc, colorless needle);  $^1\text{H NMR}$  (600 MHz, acetone- $d_6$ )  $\delta$  3.45 (s, 3H), 3.91 (s, 3H), 3.96 (s, 3H), 5.77 (s, 1H), 6.82 (d, 1H,  $J = 8.4$  Hz) 6.86 (d, 1H,  $J = 8.4$  Hz), 10.11 (s, 1H, OH);  $^{13}\text{C NMR}$  (150 MHz, acetone- $d_6$ )  $\delta$  55.3, 57.3, 58.3, 83.4, 119.8, 120.5, 127.5, 131.2, 147.9, 150.7, 153.9; **IR** (ATR) 3196, 2954, 2887, 2837, 1497, 1260. 1019, 808  $\text{cm}^{-1}$ ; **Anal.** calcd for  $\text{C}_{12}\text{H}_{14}\text{O}_5$ : C, 59.19; H, 5.87; N, 6.27. found: C, 59.06; H, 5.78; N, 6.17.

Oxime (*E*)-**2c**:  $R_f$  0.10 (hexane/EtOAc = 4/1); **mp** 112–113 °C (hexane/EtOAc, colorless needle);  $^1\text{H NMR}$  (600 MHz, acetone- $d_6$ )  $\delta$  3.45 (s, 3H), 3.84 (s, 3H), 3.91 (s, 3H), 5.54 (s, 1H), 6.93 (d, 1H,  $J = 9.0$  Hz) 6.98 (d, 1H,  $J = 9.0$  Hz), 9.80 (s, 1H, OH);  $^{13}\text{C NMR}$  (150 MHz, acetone- $d_6$ )  $\delta$  55.3, 57.3, 58.3, 83.4, 119.8, 120.5, 127.5, 131.2, 147.9, 150.7, 153.9; **IR** (ATR) 3112, 2951, 2843, 1695, 1499, 1433, 1275, 1258, 960  $\text{cm}^{-1}$ ; **HRMS** (ESI) calcd for  $\text{C}_{11}\text{H}_{14}\text{NO}_4$  ( $[\text{M}+\text{H}]^+$ )  $m/z$  224.0917, found  $m/z$  224.0913.

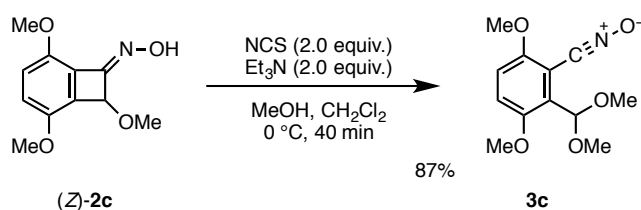

To a solution of oxime (*Z*)-**2c** (66.9 mg, 0.300 mmol) and  $\text{Et}_3\text{N}$  (55.0  $\mu\text{L}$ , 0.395 mmol) in MeOH (2.0 mL) and  $\text{CH}_2\text{Cl}_2$  (1.0 mL) was added NCS (54.0 mg, 0.387 mmol) at 0 °C. After stirring for 30 min at 0 °C, additional portion of  $\text{Et}_3\text{N}$  (29.0  $\mu\text{L}$ , 0.208 mmol) and NCS (28.2 mg, 0.211 mmol) were added. After stirring for 10 min at 0 °C, the reaction was stopped by adding water, and the mixture was extracted with EtOAc (x3). The combined organic extracts were washed with brine, dried ( $\text{Na}_2\text{SO}_4$ ), and concentrated in vacuo. The residue was purified by flash column chromatography (silica gel, hexane/EtOAc = 2/1) to give nitrile oxide **3c** (79.4 mg, 94%) as colorless oil.

$R_f$  0.37 (hexane/EtOAc = 2/1);  $^1\text{H NMR}$  (600 MHz,  $\text{CDCl}_3$ )  $\delta$  3.43 (s, 3H), 3.43 (s, 3H), 3.82 (s, 3H), 3.85 (s, 3H), 5.68 (s, 1H), 6.85 (d, 1H,  $J = 9.0$  Hz), 6.96 (d, 1H,  $J = 9.0$  Hz);  $^{13}\text{C NMR}$  (150

MHz, CDCl<sub>3</sub>) δ 54.0, 55.3, 55.6, 98.2, 101.2, 110.5, 113.4, 129.6, 150.2, 155.4 (A signal of the carbon in the nitrile oxide moiety is broadened.); **IR** (neat) 2940, 2839, 2358, 2308, 1738, 1588, 1485, 1452, 1343, 1258, 1075 1052, cm<sup>-1</sup>; **HRMS** (ESI) calcd for C<sub>12</sub>H<sub>15</sub>NNaO<sub>5</sub> ([M+Na]<sup>+</sup>) m/z 276.0842, found m/z 276.0852.

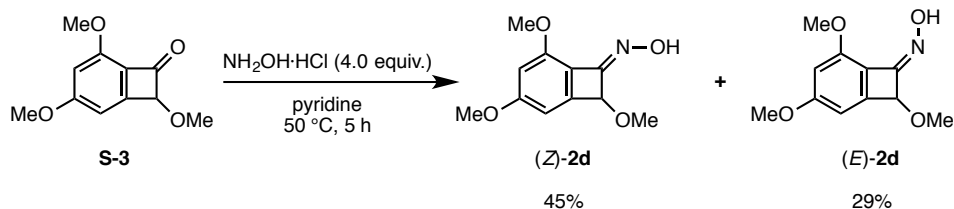

To a solution of benzocyclobutenone **S-3** (1.08 g, 5.19 mmol) in pyridine (17 mL) was added NH<sub>2</sub>OH·HCl (1.44 g, 20.7 mmol). After stirring for 5 h at 50 °C, the reaction was quenched by adding 1 M aqueous HCl, and the mixture was extracted with EtOAc (x2). The combined extracts were washed with 1 M aqueous HCl (x3) and brine, dried (Na<sub>2</sub>SO<sub>4</sub>), and concentrated in vacuo. The residue was purified by flash column chromatography (silica gel, hexane/EtOAc = 1/1) to give oxime **(Z)-2d** (524 mg, 45%) and oxime **(E)-2d** (338 mg, 29%) both as a white solid. The structures of **(Z)-2d** and **(E)-2d** were assigned by analogy to oximes **(Z)-2a** and **(E)-2a**.

Oxime **(Z)-2d**: *R<sub>f</sub>* 0.57 (hexane/EtOAc = 1/1); **mp** 109–110 °C (hexane/EtOAc, colorless needle); <sup>1</sup>H NMR (600 MHz, acetone-*d*<sub>6</sub>) δ 3.43 (s, 3H), 3.84 (s, 3H), 4.01 (s, 3H), 5.52 (s, 1H), 6.44 (d, 1H, *J* = 1.8 Hz), 6.68 (d, 1H, *J* = 1.8 Hz), 9.73 (s, 1H, OH); <sup>13</sup>C NMR (150 MHz, acetone-*d*<sub>6</sub>) δ 55.7, 56.2, 58.5, 83.3, 102.1, 104.5, 119.4, 150.8, 153.4, 155.6, 165.3; **IR** (ATR) 3252, 3079, 2935, 2835, 1694, 1603, 1575, 1447, 1363, 1132 cm<sup>-1</sup>; **Anal.** calcd for C<sub>11</sub>H<sub>13</sub>NO<sub>4</sub>: C, 59.19; H, 5.87; N, 6.27, found: C, 59.21; H, 5.79; N, 6.25.

Oxime **(E)-2d**: *R<sub>f</sub>* 0.17 (hexane/EtOAc = 1/1); **mp** 144–145 °C (hexane/EtOAc, colorless needle); <sup>1</sup>H NMR (400 MHz, acetone-*d*<sub>6</sub>) δ 3.42 (s, 3H), 3.88 (s, 3H), 3.88 (s, 3H), 5.29 (s, 1H) 6.54 (d, 1H, *J* = 1.2 Hz), 6.70 (d, 1H, *J* = 1.2 Hz), 9.44 (s, 1H, OH); <sup>13</sup>C NMR (150 MHz, acetone-*d*<sub>6</sub>) δ 56.2, 56.3, 83.3, 100.4, 102.0, 121.9, 150.1, 152.4, 154.8, 166.3 (several signals overlapped); **IR** (ATR) 3220, 3132, 2898, 1702, 1584, 1494, 1336, 1313, 1207, 1148, 952, 826 cm<sup>-1</sup>; **HRMS** (ESI) calcd for C<sub>11</sub>H<sub>14</sub>NO<sub>4</sub> ([M+H]<sup>+</sup>) m/z 224.0917, found m/z 224.0914.

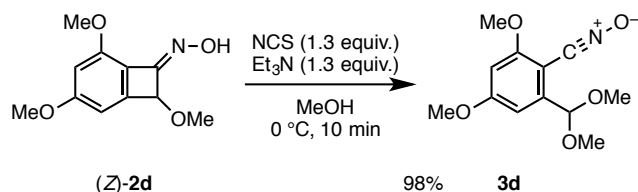

To a solution of oxime **(Z)-2d** (67.0 mg, 0.300 mmol) and Et<sub>3</sub>N (52.2 μL, 0.391 mmol) in MeOH (3.0 mL) was added NCS (55.0 mg, 0.395 mmol) at 0 °C. After stirring for 10 min at 0 °C, the reaction was stopped by adding water and brine, and the mixture was extracted with EtOAc (x3).

The combined organic extracts were washed with brine, dried (Na<sub>2</sub>SO<sub>4</sub>), and concentrated in vacuo. The residue was purified by flash column chromatography (silica gel, hexane/EtOAc = 3/1) to give nitrile oxide **3d** (74.2 mg, 98%) as a colorless oil.

**R<sub>f</sub>** 0.56 (hexane/EtOAc/CH<sub>2</sub>Cl<sub>2</sub> = 2/1/1); **<sup>1</sup>H NMR** (600 MHz, CDCl<sub>3</sub>) δ 3.39 (s, 6H), 3.86 (s, 3H), 3.87 (s, 3H), 5.41 (s, 1H), 6.43 (d, 1H, *J* = 2.4 Hz), 6.77 (d, 1H, *J* = 2.4 Hz); **<sup>13</sup>C NMR** (150 MHz, CDCl<sub>3</sub>) δ 33.8, 53.9, 55.8, 56.1, 93.8, 98.7, 101.7, 103.9, 144.2, 162.6, 163.1; **IR** (neat) 3102, 2953, 2892, 2835, 2305, 1601, 1465, 1342, 861 cm<sup>-1</sup>; **HRMS** (ESI) calcd for C<sub>12</sub>H<sub>16</sub>NO<sub>5</sub> ([M+H]<sup>+</sup>) *m/z* 254.1023, found *m/z* 254.1028.

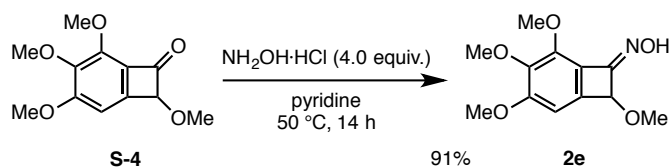

To a solution of benzocyclobutenone **S-4** (480 mg, 2.02 mmol) in pyridine (6.7 mL) was added NH<sub>2</sub>OH·HCl (280 mg, 4.03 mmol). After stirring for 1 h at 50 °C, an additional portion of NH<sub>2</sub>OH·HCl (281 mg, 4.04 mmol) was added, and the mixture was stirred for 13 h at 50 °C. The reaction was stopped by adding 1 M aqueous HCl, and the mixture was extracted with EtOAc (x3). The combined organic extracts were washed with 1 M aqueous HCl (x3) and brine, dried (Na<sub>2</sub>SO<sub>4</sub>), and concentrated in vacuo. The residue was purified by trituration with hexane and EtOAc to give oxime **2e** (425 mg, 83%) as a white solid. The mother liquor was concentrated in vacuo, and the residue was purified by flash column chromatography (silica gel, hexane/EtOAc = 2/1) to give oxime **2e** (41.7 mg, 8%; total yield = 91%).

Oxime **2e**: **R<sub>f</sub>** 0.59 (hexane/EtOAc = 1/1); **mp** 124–125 °C (hexane/EtOAc, colorless needle); **<sup>1</sup>H NMR** (600 MHz, acetone-*d*<sub>6</sub>) δ 3.43 (s, 3H), 3.70 (s, 3H), 3.89 (s, 3H), 4.10 (s, 3H), 5.50 (s, 1H), 6.82 (s, 1H), 9.80 (s, 1H, OH); **<sup>13</sup>C NMR** (150 MHz, acetone-*d*<sub>6</sub>) δ 55.6, 56.8, 59.8, 60.7, 83.3, 101.6, 119.8, 141.1, 143.7, 149.1, 153.7, 158.7; **IR** (ATR) 3327, 2940, 2830, 1675, 1591, 1479, 1415, 1330, 1243, 1199, 1132 cm<sup>-1</sup>; **HRMS** (ESI) calcd for C<sub>12</sub>H<sub>16</sub>NO<sub>5</sub> ([M+H]<sup>+</sup>) *m/z* 254.1023, found *m/z* 254.1023.

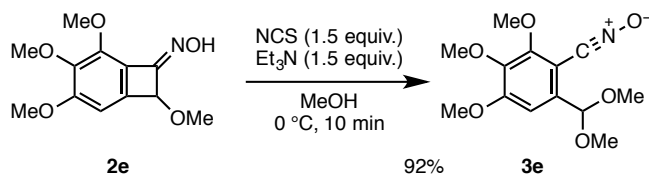

To a solution of oxime **2e** (76.0 mg, 0.300 mmol) and Et<sub>3</sub>N (63.0 μL, 0.452 mmol) in MeOH (3.0 mL) was added NCS (60.4 mg, 0.452 mmol) at 0 °C. After stirring for 10 min at 0 °C, the reaction was stopped by adding water and brine, and the mixture was extracted with EtOAc (x3).



The combined organic extracts were washed with brine, dried (Na<sub>2</sub>SO<sub>4</sub>), and concentrated in vacuo. The residue was purified by flash column chromatography (silica gel, hexane/EtOAc/CH<sub>2</sub>Cl<sub>2</sub> = 4/1/1) to give nitrile oxide **3e** (78.6 mg, 92%) as colorless oil.

**R<sub>f</sub>** 0.54 (hexane/EtOAc/CH<sub>2</sub>Cl<sub>2</sub> = 2/1/1); **<sup>1</sup>H NMR** (600 MHz, CDCl<sub>3</sub>) δ 3.40 (s, 6H), 3.86 (s, 3H), 3.92 (s, 3H), 4.00 (s, 3H), 5.38 (s, 1H), 6.93 (s, 1H); **<sup>13</sup>C NMR** (150 MHz, CDCl<sub>3</sub>) δ 54.1, 56.3, 61.1, 61.8, 99.3, 101.8, 105.9, 137.9, 141.9, 155.86 (A signal of the carbon in the nitrile oxide moiety is broadened.); **IR** (neat) 3019, 2360, 2342, 1348, 1215, 756 cm<sup>-1</sup>; **HRMS** (ESI) calcd for C<sub>13</sub>H<sub>17</sub>NO<sub>6</sub> ([M+H]<sup>+</sup>) 284.1129, found m/z 284.1134.

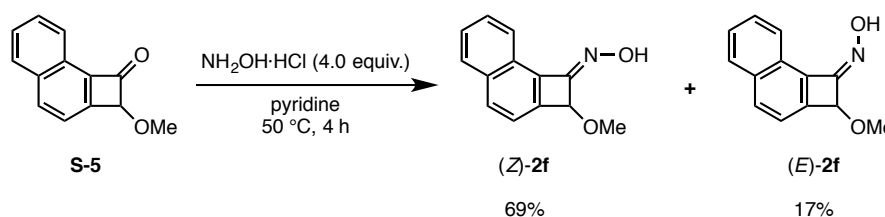

To a solution of naphthocyclobutenone **S-5** (1.30 g, 6.56 mmol) in pyridine (22 mL) was added NH<sub>2</sub>OH·HCl (1.82 g, 26.2 mmol). After stirring for 4 h at 50 °C, the reaction was quenched by adding 1 M aqueous HCl, and the mixture was extracted with EtOAc (x2). The combined extracts were washed with 1 M aqueous HCl (x3) and brine, dried (Na<sub>2</sub>SO<sub>4</sub>), and concentrated in vacuo. The residue was purified by flash column chromatography (silica gel, hexane/EtOAc = 4/1) to give oxime (*Z*)-**2f** (966 mg, 69%) and oxime (*E*)-**2f** (236 mg, 17%) both as a white solid. The structures of (*Z*)-**2f** and (*E*)-**2f** were assigned by analogy to oximes (*Z*)-**2a** and (*E*)-**2a**.

Oxime (*Z*)-**2f**: **R<sub>f</sub>** 0.39 (hexane/EtOAc = 2/1); **mp** 149–150 °C (hexane/EtOAc, colorless needle); **<sup>1</sup>H NMR** (600 MHz, acetone-*d*<sub>6</sub>) δ 3.52 (s, 3H), 5.57 (s, 1H), 7.62 (dd, 1H, *J* = 7.8 Hz, 8.4 Hz), 7.65 (d, *J* = 8.4 Hz), 7.67 (dd, 1H, *J* = 7.8 Hz, 7.8 Hz), 8.02 (d, 1H, *J* = 8.4 Hz), 8.09 (d, 1H, *J* = 8.4 Hz), 8.74 (d, 1H, *J* = 7.8 Hz) 10.42 (s, 1H, OH); **<sup>13</sup>C NMR** (150 MHz, acetone-*d*<sub>6</sub>) δ 56.6, 83.8, 121.4, 127.0, 127.6, 128.0, 128.6, 130.2, 134.4, 135.8, 139.2, 149.8, 153.2; **IR** (ATR) 3247, 3135, 2995, 2929, 2894, 2819, 1705, 1437, 1334, 1083, 923 cm<sup>-1</sup>; **Anal.** calcd for C<sub>13</sub>H<sub>11</sub>NO<sub>2</sub>: C, 73.23; H, 5.26; N 6.57, found: C, 73.16; H, 5.26; N 6.61.

Oxime (*E*)-**2f**: **R<sub>f</sub>** 0.30 (hexane/EtOAc = 2/1); **mp** 111–112 °C (hexane/EtOAc, white solid); **<sup>1</sup>H NMR** (600 MHz, acetone-*d*<sub>6</sub>) δ 3.51 (s, 3H), 5.80 (s, 1H), 7.62 (dd, 1H, *J* = 7.2, 8.4 Hz), 7.63 (d, 1H, *J* = 7.8 Hz), 7.67 (dd, 1H, *J* = 7.2, 8.4 Hz), 7.99 (d, 1H, *J* = 8.4 Hz), 8.01 (d, 1H, *J* = 7.8 Hz), 8.04 (d, 1H, *J* = 8.4 Hz), 10.14 (s, 1H, OH); **<sup>13</sup>C NMR** (150 MHz, acetone-*d*<sub>6</sub>) δ 55.9, 84.9, 21.8, 125.5, 126.7, 128.0, 128.9, 130.4, 132.9, 135.8, 139.0, 147.9, 155.4; **IR** (ATR) 3176, 3105, 2995, 2955, 2878, 2826, 1681, 1457, 1343, 1153, 1086 cm<sup>-1</sup>; **HRMS** (ESI) calcd for C<sub>13</sub>H<sub>12</sub>NO<sub>2</sub> ([M+H]<sup>+</sup>) m/z 214.0863, found m/z 214.0857.

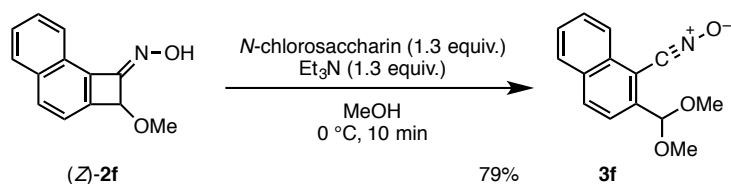

To a solution of oxime (**Z**)-**2f** (64.0 mg, 0.300 mmol) and Et<sub>3</sub>N (54.5. μL, 0.391 mmol) in MeOH (3.0 mL) was added *N*-chlorosaccharin (55.0 mg, 0.395 mmol) at 0 °C. After stirring for 10 min at 0 °C, the reaction was stopped by adding water, and the mixture was extracted with EtOAc (x3). The combined organic extracts were washed with brine, dried (Na<sub>2</sub>SO<sub>4</sub>), and concentrated in vacuo. The residue was purified by flash column chromatography (silica gel, hexane/EtOAc = 3/1) to give nitrile oxide **3f** (59.4 mg, 79%) as colorless oil.

**R<sub>f</sub>** 0.79 (hexane/EtOAc/CH<sub>2</sub>Cl<sub>2</sub> = 2/1/1); **<sup>1</sup>H NMR** (600 MHz, CDCl<sub>3</sub>) δ 3.44 (s, 6H), 5.70 (s, 1H), 7.60 (dd, 1H, *J* = 8.4, 8.4 Hz), 7.66 (dd, 1H, *J* = 8.4, 7.8 Hz), 7.76 (d, 1H, *J* = 8.4 Hz), 7.91 (d, 1H, *J* = 7.8 Hz), 7.98 (d, 1H, *J* = 8.4 Hz), 8.15 (d, 1H, *J* = 8.4 Hz); **<sup>13</sup>C NMR** (150 MHz, CDCl<sub>3</sub>) δ 54.0, 102.4, 110.0, 124.0, 125.2, 127.6, 128.4, 128.6, 130.9, 133.2, 133.4, 141.6 (A signal of the carbon in the nitrile oxide moiety is broadened.); **IR** (neat) 3060, 2935, 2828, 2292, 1308, 1113, 1048 cm<sup>-1</sup>; **HRMS** (ESI) calcd for C<sub>14</sub>H<sub>13</sub>NNaO<sub>3</sub> ([M+Na]<sup>+</sup>) *m/z* 266.0788, found *m/z* 226.0789.

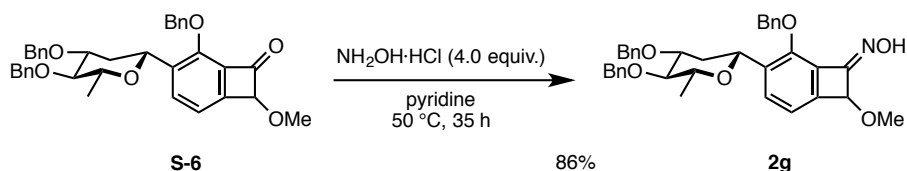

To a solution of benzocyclobutenone **S-6** (2.21 g, 3.91 mmol) in pyridine (13 mL) was added NH<sub>2</sub>OH·HCl (545 mg, 7.84 mmol). After stirring for 20 h at 50 °C, additional portions of NH<sub>2</sub>OH·HCl (271 mg, 3.90 mmol; 277 mg, 3.99 mmol) was added with 6 h intervals. After the stirring for 8.5 h at 50 °C, the reaction was stopped by adding 1 M aqueous HCl. The mixture was extracted with EtOAc (x3), and the combined extracts were washed with 1 M aqueous HCl (x2), and brine, dried (Na<sub>2</sub>SO<sub>4</sub>), and concentrated in vacuo. The residue was purified by trituration with hexane and EtOAc to give oxime **2g** (542 mg, 24%) as a white solid. The mother liquor was concentrated in vacuo, and the residue was purified by flash column chromatography (silica gel, hexane/EtOAc = 5/2) to give oxime **2g** (1.41 g, 62%; total yield = 86%, a mixture of two stereoisomers, ratio = 1:1).

Oxime **2g**: **R<sub>f</sub>** 0.48 (hexane/EtOAc = 2/1); **mp** 91–93 °C (hexane/EtOAc, colorless needle); **<sup>1</sup>H NMR** (600 MHz, acetone-*d*<sub>6</sub>, ratio of diastereomers = 1/1, signals for the isomer are marked with an asterisk) δ 1.320 (d, 3H, *J* = 6.0 Hz), 1.322\* (d, 3H, *J* = 6.0 Hz), 1.34–1.40 (m, 1H), 1.34–1.40\* (m, 1H), 2.50–2.55 (m, 1H), 2.50–2.55\* (m, 1H), 3.16 (dd, 1H, *J* = 9.0, 9.0 Hz), 3.16\* (dd,

1H,  $J = 9.0, 9.0$  Hz), 3.44\* (s, 3H), 3.46–3.50 (m, 1H), 3.46–3.50\* (m, 1H), 3.48 (s, 3H), 3.72–3.76 (m, 1H), 3.72–3.76\* (m, 1H), 4.54 (d, 1H,  $J = 11.4$  Hz), 4.54\* (d, 1H,  $J = 11.4$  Hz), 4.65 (d, 1H,  $J = 11.4$  Hz), 4.67\* (d, 1H,  $J = 11.4$  Hz), 4.71 (d, 1H,  $J = 10.8$  Hz), 4.71\* (d, 1H,  $J = 10.8$  Hz), 4.80 (dd, 1H,  $J = 10.2, 7.2$  Hz), 4.80\* (dd, 1H,  $J = 10.2, 7.2$  Hz), 4.99 (d, 1H,  $J = 10.8$  Hz), 4.99\* (d, 1H,  $J = 10.8$  Hz), 5.52 (d, 1H,  $J = 12.6$  Hz), 5.59 (s, 1H), 5.59\* (s, 1H), 5.61 (d, 1H, 12.6 Hz), 5.61\* (d, 1H, 12.6 Hz), 5.67\* (d, 1H,  $J = 12.6$  Hz), 7.107\* (d, 1H,  $J = 7.2$  Hz), 7.111 (d, 1H,  $J = 7.2$  Hz), 7.24–7.41 (m, 13H), 7.24–7.41\* (m, 13H), 7.50 (d, 2H,  $J = 7.8$  Hz), 7.50\* (d, 2H,  $J = 7.8$  Hz), 7.58 (d, 1H,  $J = 7.2$  Hz), 7.58\* (d, 1H,  $J = 7.2$  Hz), 10.23 (s, 1H, OH), 10.23\* (s, 1H, OH);  $^{13}\text{C}$  NMR (150 MHz, acetone- $d_6$ )  $\delta$  19.0, 38.6, 38.7, 55.7, 56.0, 71.29, 71.32, 72.6, 72.7, 73.4, 75.5, 76.4, 81.66, 81.69, 83.2, 83.4, 84.8, 116.9, 126.5, 128.2, 128.50, 128.53, 128.6, 128.7, 128.92, 128.93, 129.0, 129.1, 129.4, 131.1, 133.9, 134.0, 138.39, 138.41, 134.0, 140.2, 148.35, 148.44, 149.1, 154.3 (several signals overlapped); IR (ATR) 3318, 3031, 2925, 2850, 1591, 1086, 730, 694  $\text{cm}^{-1}$ ; Anal. calcd for  $\text{C}_{36}\text{H}_{37}\text{NO}_6$ : C, 74.59; H, 6.43; N 2.42, found: C, 74.69; H, 6.35; N 2.42.

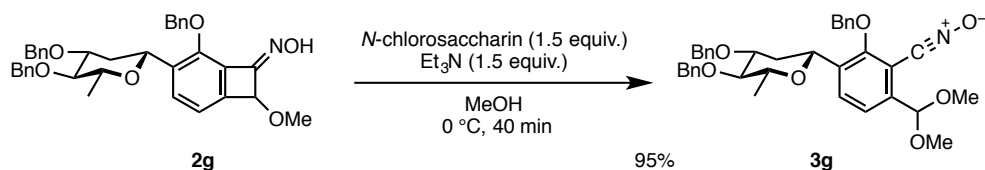

To a solution of oxime **2g** (87.1 mg, 0.150 mmol) and  $\text{Et}_3\text{N}$  (27.2  $\mu\text{L}$ , 0.195 mmol) in MeOH (1.5 mL) was added *N*-chlorosaccharin (42.2 mg, 0.195 mmol) at 0 °C. After stirring for 35 min at 0 °C, an additional portion of  $\text{Et}_3\text{N}$  (4.2  $\mu\text{L}$ , 0.030 mmol) and *N*-chlorosaccharin (6.6 mg, 0.031 mmol) was added. After stirring for 5 min at 0 °C, the reaction was stopped by adding water, and the mixture was extracted with EtOAc (x3). The combined organic extracts were washed with brine, dried ( $\text{Na}_2\text{SO}_4$ ), and concentrated in vacuo. The residue was purified by flash column chromatography (silica gel, hexane/EtOAc = 3/1) to give nitrile oxide **3g** (86.6 mg, 95%) as colorless oil. At 5 °C, nitrile oxide **3g** gradually underwent decomposition.

$R_f$  0.21 (hexane/EtOAc/ $\text{CH}_2\text{Cl}_2 = 16/1/2$ );  $^1\text{H}$  NMR (600 MHz,  $\text{CDCl}_3$ )  $\delta$  1.33 (d, 3H,  $J = 6.0$  Hz), 1.57–1.62 (m, 1H), 2.23 (ddd, 1H, 12.6, 4.8, 1.2 Hz), 3.16 (dd, 1H,  $J = 9.0, 9.0$  Hz), 3.36 (s, 3H), 3.38–3.41 (m, 1H), 3.41 (s, 3H), 3.63 (ddd, 1H,  $J = 12.6, 9.0, 4.8$  Hz), 4.54 (d, 1H,  $J = 12.0$  Hz), 4.57 (dd, 1H,  $J = 12.6, 1.2$  Hz), 4.60 (d, 1H,  $J = 12.0$  Hz), 4.68 (d, 1H,  $J = 10.8$  Hz), 4.97 (d, 1H,  $J = 10.8$  Hz), 5.03 (d, 1H, 10.8 Hz), 5.11 (d, 1H, 10.8 Hz), 5.46 (s, 1H), 7.28–7.43 (m, 16H), 7.60 (d, 1H,  $J = 7.8$  Hz);  $^{13}\text{C}$  NMR (150 MHz,  $\text{CDCl}_3$ )  $\delta$  18.6, 37.6, 53.4, 53.9, 71.3, 71.4, 75.4, 75.9, 77.8, 80.7, 83.8, 101.5, 107.1, 123.4, 127.65, 127.68, 128.1, 128.4, 128.5, 128.8, 129.3, 135.8, 136.1, 138.3, 138.4, 142.1, 158.4 (A signal of the carbon in the nitrile oxide moiety is broadened, and several signals overlapped.); IR (neat) 3629, 3088, 3063, 3030, 2933, 2880, 2298,

1952, 1870, 1810, 1736, 1604, 1497, 1454, 1335, 1251, 1113, 737, 698  $\text{cm}^{-1}$ ; **HRMS** (ESI) calcd for  $\text{C}_{37}\text{H}_{40}\text{NO}_7$  ( $[\text{M}+\text{H}]^+$ )  $m/z$  610.2799, found  $m/z$  610.2805.

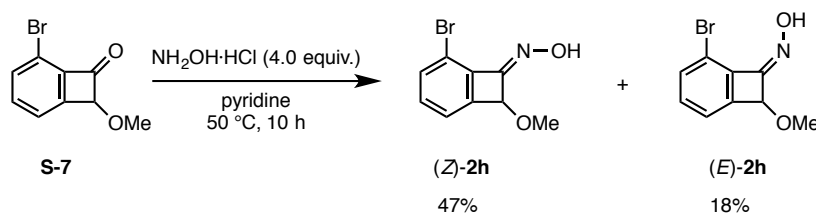

To a solution of benzocyclobutenone **S-7** (250 mg, 1.10 mmol) in pyridine (3.7 mL) was added  $\text{NH}_2\text{OH}\cdot\text{HCl}$  (306 mg, 4.40 mmol). After stirring for 10 h at 50 °C, the reaction was quenched by adding 1 M aqueous HCl, and the mixture was extracted with EtOAc (x3). The combined extracts were washed with 1 M aqueous HCl (x2) and brine, dried ( $\text{Na}_2\text{SO}_4$ ), and concentrated in vacuo. The residue was purified by flash column chromatography (silica gel, hexane/EtOAc/ $\text{CHCl}_3$  = 3/1/2) to give oxime **(Z)-2h** (126.2 mg, 47%) and oxime **(E)-2h** (48.7 mg 18%) both as a white solid. The structures of **(Z)-2h** and **(E)-2h** were assigned by analogy to oximes **(Z)-2a** and **(E)-2a**. Oxime **(Z)-2h**:  $R_f$  0.34 (hexane/EtOAc = 3/1); **mp** 119–120 °C (hexane/EtOAc, colorless needle);  $^1\text{H NMR}$  (600 MHz, acetone- $d_6$ )  $\delta$  3.47 (s, 3H), 5.67 (s, 1H), 7.37 (dd, 1H,  $J$  = 8.4, 7.8 Hz), 7.52 (d, 1H,  $J$  = 7.8 Hz), 7.62 (d, 1H,  $J$  = 8.4 Hz), 10.4 (s, 1H, OH);  $^{13}\text{C NMR}$  (150 MHz, acetone- $d_6$ )  $\delta$  56.2, 84.6, 113.0, 123.5, 133.4, 134.7, 142.1, 150.8, 154.1; **IR** (ATR) 3303, 3072, 2938, 2822, 1440, 1341, 1327, 1201, 1137, 1097, 1017, 933, 789  $\text{cm}^{-1}$ ; **HRMS** (ESI) calcd for  $\text{C}_9\text{H}_9\text{BrNO}_2$  ( $[\text{M}+\text{H}]^+$ )  $m/z$  241.9811, found  $m/z$  241.9802.

Oxime **(E)-2h**:  $R_f$  0.24 (hexane/EtOAc = 3/1); **mp** 139–140 °C (hexane/EtOAc, colorless needle);  $^1\text{H NMR}$  (600 MHz, acetone- $d_6$ )  $\delta$  3.47 (s, 3H), 5.43 (s, 1H), 7.41 (dd, 1H,  $J$  = 7.8, 7.2 Hz), 7.55 (d, 1H,  $J$  = 7.2 Hz), 7.68 (d, 1H,  $J$  = 7.8 Hz), 10.50 (s, 1H, OH);  $^{13}\text{C NMR}$  (150 MHz,  $\text{CDCl}_3$ )  $\delta$  57.5, 84.1, 115.8, 124.0, 135.0, 136.1, 142.6, 150.6, 153.0; **IR** (ATR) 3188, 3069, 2998, 2830, 1687, 1565, 1450, 1320, 1199, 1138  $\text{cm}^{-1}$ ; **HRMS** (ESI) calcd for  $\text{C}_9\text{H}_9\text{BrNO}_2$  ( $[\text{M}+\text{H}]^+$ )  $m/z$  241.9811, found  $m/z$  241.9803.

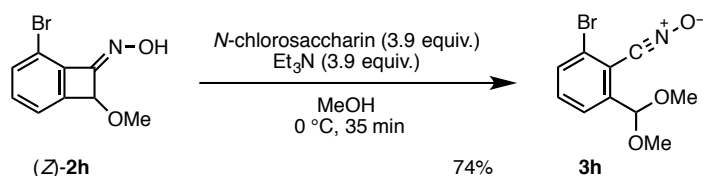

To a solution of oxime **(Z)-2h** (72.6 mg, 0.300 mmol) and  $\text{Et}_3\text{N}$  (55.0  $\mu\text{L}$ , 0.395 mmol) in MeOH (3.0 mL) was added *N*-chlorosaccharin (42.2 mg, 0.195 mmol) at 0 °C. The reaction mixture was stirred for 15 min at 0 °C, and additional portions of  $\text{Et}_3\text{N}$  (55.0  $\mu\text{L}$ , 0.395 mmol) and *N*-chlorosaccharin (84.6 mg, 0.390 mmol; 84.7 mg, 0.390 mmol) were added with 15 min intervals. After stirring for 5 min at 0 °C, the reaction was stopped by adding water, and the

mixture was extracted with EtOAc (x3). The combined organic extracts were washed with brine, dried (Na<sub>2</sub>SO<sub>4</sub>), and concentrated in vacuo. The residue was purified by flash column chromatography (silica gel, hexane/EtOAc = 8/1) to give nitrile oxide **3h** (60.4 mg, 74%) as colorless oil.

**R<sub>f</sub>** 0.63 (hexane/EtOAc = 3/1); **<sup>1</sup>H NMR** (600 MHz, CDCl<sub>3</sub>) δ 3.39 (s, 6H), 5.47 (s, 1H), 7.34 (dd, 1H, *J* = 9.0, 9.0 Hz), 7.60 (d, 1H, *J* = 9.0 Hz), 7.62 (d, 1H, *J* = 9.0 Hz); **<sup>13</sup>C NMR** (150 MHz, CDCl<sub>3</sub>) δ 53.8, 101.6, 115.9, 126.1, 127.0, 131.1, 132.9, 143.9 (A signal of the carbon in the nitrile oxide moiety is broadened.); **IR** (neat) 2995, 2935, 2832, 2298, 1448, 1370, 1341, 1145, 1116, 1053, cm<sup>-1</sup>; **HRMS** (ESI) calcd for C<sub>10</sub>H<sub>11</sub>BrNO<sub>3</sub> ([M+H]<sup>+</sup>) *m/z* 271.9917, found *m/z* 271.9915.

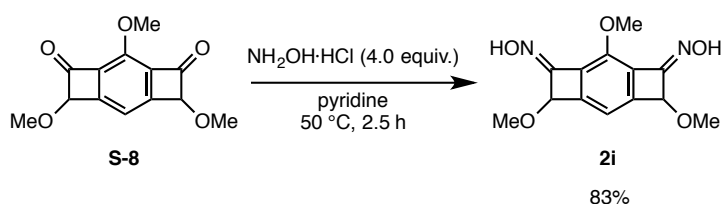

To a solution of diketone **S-8** (449 mg, 1.81 mmol) in pyridine (6.0 mL) was added NH<sub>2</sub>OH·HCl (503 mg, 7.24 mmol). After stirring for 2.5 h at 50 °C, the reaction was quenched by adding 1 M aqueous HCl, and the mixture was extracted with EtOAc (x3). The combined organic extracts were washed with 1 M aqueous HCl (x3) and brine, dried (Na<sub>2</sub>SO<sub>4</sub>), and concentrated in vacuo. The residue was purified by trituration with hexane and EtOAc to give oxime **2i** (354 mg, 70%) as a white solid. The mother liquor was concentrated in vacuo, and the residue was purified by flash column chromatography (silica gel, hexane/EtOAc = 1/1) to give oxime **2i** (67.1 mg, 13%; total yield = 83%, a mixture of four stereoisomers, ratio = 1:1:1:1) as a white solid.

**R<sub>f</sub>** 0.32 (hexane/EtOAc = 1/1); **mp** 168–173 °C (decomp.) (hexane/EtOAc, white solid); **<sup>1</sup>H NMR** (600 MHz, acetone-*d*<sub>6</sub>, without distinction of the four stereoisomers) δ 3.45–3.49 (m, 6H), 4.19 (s, 0.75H), 4.19 (s, 0.75H), 4.21 (s, 0.75H), 4.21 (s, 0.75H), 5.32 (s, 0.25H), 5.33 (s, 0.25H), 5.55 (s, 0.25H), 5.556 (s, 0.25H), 5.560 (s, 0.25H), 5.57 (s, 0.25H), 7.20 (s, 0.25H), 7.21 (s, 0.25H), 7.22 (s, 0.25H), 7.23 (s, 0.25H), 9.95 (s, 0.5H, OH), 10.17 (s, 1H, OH), 10.17 (s, 0.5H, OH), 10.26 (s, 0.5H, OH); **<sup>13</sup>C NMR** (150 MHz, acetone-*d*<sub>6</sub>) δ 56.07, 56.11, 56.2, 56.61, 56.64, 60.2, 60.3, 82.5, 82.7, 82.8, 83.0, 33.0, 83.2, 112.2, 112.3, 112.6, 112.7, 127.5, 127.6, 128.9, 129.0, 129.8, 130.0, 147.3, 147.4, 147.46, 147.50, 149.9, 150.1, 153.4, 153.48, 153.54, 153.6, 153.9, 153.9, 154.0, 154.6, 154.7, 155.06, 155.14; **IR** (ATR) 3297, 2934, 2895, 2832, 2360, 2342, 1674, 1583, 1294, 1062 cm<sup>-1</sup>; **HRMS** (ESI) calcd for C<sub>13</sub>H<sub>15</sub>N<sub>2</sub>O<sub>5</sub> ([M+H]<sup>+</sup>) *m/z* 279.0976, found *m/z* 279.0973.

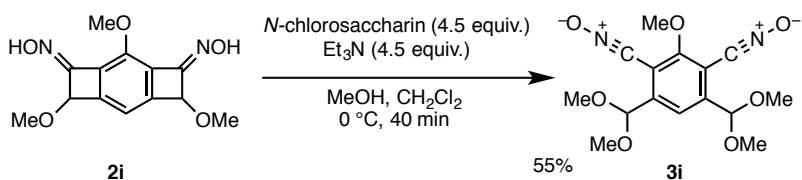

To a solution of oxime **2i** (41.7 mg, 0.150 mmol) and Et<sub>3</sub>N (73.0 μL, 0.524 mmol) in MeOH (0.75 mL) and CH<sub>2</sub>Cl<sub>2</sub> (0.75 mL) was added *N*-chlorosaccharin (42.2 mg, 0.524 mmol) at 0 °C. After stirring for 30 min at 0 °C, an additional portion of Et<sub>3</sub>N (20.9 μL, 0.150 mmol) and *N*-chlorosaccharin (32.5 mg, 0.150 mmol) was added. After stirring for 10 min at 0 °C, the reaction was stopped by adding water, and the mixture was extracted with EtOAc (x3). The combined organic extracts were washed with brine, dried (Na<sub>2</sub>SO<sub>4</sub>), and concentrated in vacuo. The residue was purified by flash column chromatography (silica gel, hexane/EtOAc = 3/1) to give nitrile oxide **3i** (27.8 mg, 55%) as colorless oil.

**R<sub>f</sub>** 0.62 (hexane/EtOAc = 1/1); **<sup>1</sup>H NMR** (600 MHz, CDCl<sub>3</sub>) δ 3.39 (s, 12H), 4.13 (s, 3H), 5.44 (s, 2H), 7.64 (s, 1H); **<sup>13</sup>C NMR** (150 MHz, CDCl<sub>3</sub>) δ 30.5, 53.9, 62.9, 101.1, 107.5, 121.5, 144.6, 164.8; **IR** (neat) 2939, 2833, 2360, 2341, 1507, 1373, 1345, 1115, 1056, 668 cm<sup>-1</sup>; **HRMS** (ESI) calcd for C<sub>15</sub>H<sub>19</sub>N<sub>2</sub>O<sub>7</sub> ([M+H]<sup>+</sup>) m/z 339.1187, m/z found 339.1191.

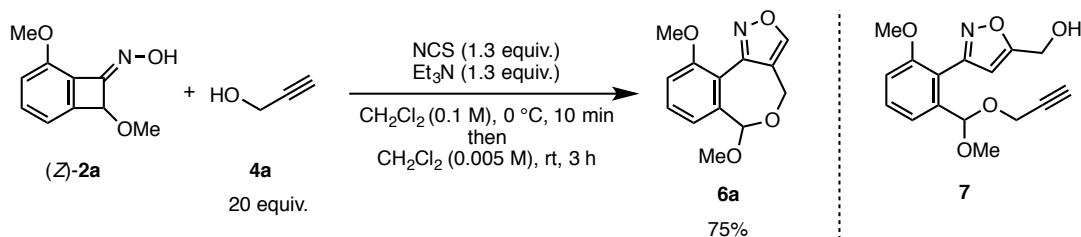

To a solution of oxime (*Z*)-**2a** (29.0 mg, 0.150 mmol), Et<sub>3</sub>N (27.2 μL, 0.195 mmol), and propargylalcohol (**4a**) (177 μL, 3.02 mmol) in CH<sub>2</sub>Cl<sub>2</sub> (1.5 mL) was added NCS (26.1 mg, 0.195 mmol) at 0 °C. After stirring for 10 min at 0 °C, the solution was diluted with CH<sub>2</sub>Cl<sub>2</sub> (30 mL). After kept standing for 3 h at room temperature, the reaction was stopped by adding water, and the mixture was extracted with EtOAc (x3). The combined organic extracts were washed with brine, dried (Na<sub>2</sub>SO<sub>4</sub>), and concentrated in vacuo. The residue was purified by PTLC (hexane/EtOAc/CHCl<sub>3</sub> = 1/1/1) to give isoxazole **6a** (27.8 mg, 75%) as colorless oil.

Isoxazole **6a**: **R<sub>f</sub>** 0.56 (hexane/EtOAc/CHCl<sub>3</sub> = 1/1/1); **<sup>1</sup>H NMR** (600 MHz, CDCl<sub>3</sub>) δ 3.32 (s, 3H), 3.95 (s, 3H), 4.49 (d, 1H, *J* = 12.6 Hz), 4.67 (d, 1H, *J* = 12.6 Hz), 5.47 (s, 1H), 7.10 (d, 1H, *J* = 8.4 Hz), 7.14 (d, 1H, *J* = 7.2 Hz), 7.46 (dd, 1H, *J* = 8.4, 7.2 Hz), 8.37 (s, 1H); **<sup>13</sup>C NMR** (150 MHz, CDCl<sub>3</sub>) δ 55.4, 56.3, 56.4, 103.5, 112.7, 115.4, 117.4, 120.8, 131.1, 139.2, 152.9, 157.2, 159.1; **IR** (neat) 3106, 2937, 2897, 2838, 2236, 1620, 1600, 1579, 1476, 1272, 1073, 1044 cm<sup>-1</sup>; **HRMS** (ESI) calcd for C<sub>13</sub>H<sub>14</sub>NO<sub>4</sub> ([M+H]<sup>+</sup>) m/z 248.0917, found m/z 248.0914.

Isoxazole **7**: **R<sub>f</sub>** 0.38 (hexane/EtOAc/CHCl<sub>3</sub> = 1/1/1); **<sup>1</sup>H NMR** (600 MHz, CDCl<sub>3</sub>) δ 2.29 (br,

1H), 2.36 (dd, 1H,  $J = 2.4, 2.4$  Hz), 3.30 (s, 3H), 3.78 (s, 3H), 4.10 (dd, 1H,  $J = 15.6, 2.4$  Hz), 4.19 (dd, 1H,  $J = 15.6, 2.4$  Hz), 4.83 (, 1H), 5.65 (s, 1H), 7.98 (d, 1H,  $J = 7.8$  Hz), 7.35 (d, 1H,  $J = 7.8$  Hz), 7.45 (dd, 1H,  $J = 7.8, 7.8$  Hz);  $^{13}\text{C NMR}$  (150 MHz,  $\text{CDCl}_3$ )  $\delta$  53.6, 54.1, 55.9, 56.7, 74.3, 79.3, 99.5, 105.0, 111.4, 117.6, 118.9, 130.6, 138.4, 157.6, 158.7, 170.4; **IR** (neat) 3408, 3286, 2936, 2838, 1604, 1473, 1269, 1116, 1068  $\text{cm}^{-1}$ ; **HRMS** (ESI) calcd for  $\text{C}_{16}\text{H}_{17}\text{NNaO}_5$  ( $[\text{M}+\text{Na}]^+$ )  $m/z$  326.09989, found  $m/z$  326.10042.

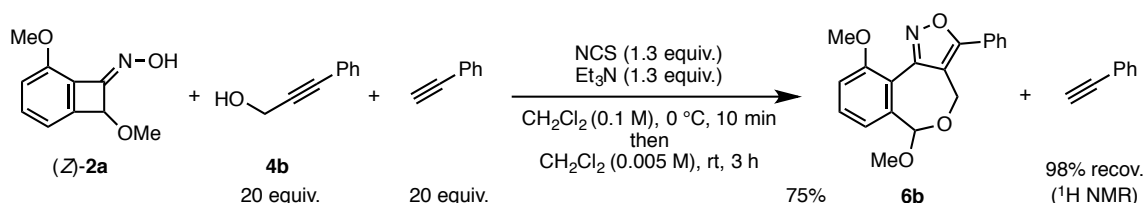

To a solution of oxime (*Z*)-**2a** (29.1 mg, 0.151 mmol),  $\text{Et}_3\text{N}$  (26.8  $\mu\text{L}$ , 0.193 mmol), propargylalcohol **4b** (370  $\mu\text{L}$ , 3.03 mmol), and phenylacetylene (330  $\mu\text{L}$ , 3.02 mmol) in  $\text{CH}_2\text{Cl}_2$  (1.5 mL) was added NCS (26.0 mg, 0.195 mmol) at 0 °C. After stirring for 10 min at 0 °C, the solution was diluted with  $\text{CH}_2\text{Cl}_2$  (30 mL). After kept standing for 3 h at room temperature, the reaction was stopped by adding water, and the mixture was extracted with  $\text{EtOAc}$  (x3). The combined organic extracts were washed with brine, dried ( $\text{Na}_2\text{SO}_4$ ), and concentrated in vacuo. The residue was purified by PTLC (hexane/ $\text{EtOAc} = 2/1$ ) to give isoxazole **6b** (36.4 mg, 75%) as colorless oil. The yield of unreacted phenylacetylene (98%) was determined by  $^1\text{H NMR}$  analysis of the crude sample using mesitylene as an internal standard.

$R_f$  0.43 (hexane/ $\text{EtOAc}/\text{CH}_2\text{Cl}_2 = 2/1/1$ );  $^1\text{H NMR}$  (600 MHz,  $\text{CDCl}_3$ )  $\delta$  3.38 (s, 3H), 3.98 (s, 3H), 4.64 (d, 1H,  $J = 13.2$  Hz), 4.85 (d, 1H,  $J = 13.2$  Hz), 5.54 (s, 1H), 7.12 (d, 1H,  $J = 8.4$  Hz), 7.18 (d,  $J = 7.2$  Hz), 7.46–7.76 (m, 4H), 7.77 (d, 2H,  $J = 8.4$  Hz);  $^{13}\text{C NMR}$  (150 MHz,  $\text{CDCl}_3$ )  $\delta$  55.6, 56.4, 58.2, 103.4, 112.7, 112.8, 115.9, 120.5, 127.2, 127.7, 129.1, 130.1, 131.1, 139.3, 157.3, 160.7, 163.8; **IR** (neat) 3066, 3000, 2944, 2844, 1597, 1474, 1413, 1353, 1270, 1084, 1061, 942, 698  $\text{cm}^{-1}$ ; **HRMS** (ESI) calcd for  $\text{C}_{19}\text{H}_{18}\text{NO}_4$  ( $[\text{M}+\text{H}]^+$ )  $m/z$  324.1232, Found  $m/z$  324.1230.

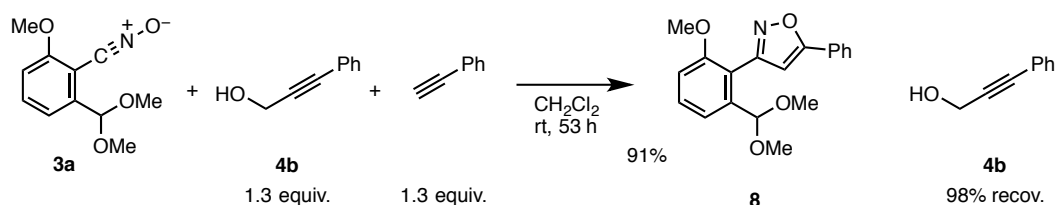

To a solution of nitrile oxide **3a** (50.0 mg, 0.224 mmol) in  $\text{CH}_2\text{Cl}_2$  (0.90 mL) was added propargylalcohol **4b** (36.0  $\mu\text{L}$ , 0.291 mmol) and phenylacetylene (32.0  $\mu\text{L}$ , 0.291 mmol) at room temperature. After stirring for 53 h at room temperature, the mixture was concentrated in vacuo. The residue was purified by PTLC (hexane/ $\text{EtOAc} = 1/1$ ) to give isoxazole **9** (66.3 mg, 91%) as colorless oil.

**R<sub>f</sub>** 0.34 (hexane/EtOAc/CH<sub>2</sub>Cl<sub>2</sub> = 2/1/1); **<sup>1</sup>H NMR** (600 MHz, CDCl<sub>3</sub>) δ 3.30 (s, 6H), 3.80 (s, 3H), 5.43 (s, 1H), 6.63 (s, 1H) 6.99 (d, 1H, *J* = 8.4 Hz), 7.36 (d, 1H, *J* = 7.8 Hz), 7.43–7.50 (m, 4H), 7.85 (d, 2H, *J* = 7.8 Hz); **<sup>13</sup>C NMR** (150 MHz, CDCl<sub>3</sub>) δ 54.1, 56.0, 101.7, 102.5, 111.2, 117.8, 118.7, 125.9, 127.7, 129.0, 130.0, 130.5, 157.7, 159.4, 169.1; **IR** (neat) 2932, 2906, 2827, 1601, 1586, 1575, 1470, 1269, 1076, 1053, 763, 696 cm<sup>-1</sup>; **HRMS** (ESI) calcd for C<sub>19</sub>H<sub>19</sub>NNaO<sub>4</sub> ([M+Na]<sup>+</sup>) *m/z* 348.1206, Found *m/z* 348.1209.



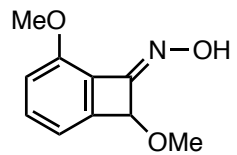

(Z)-2a

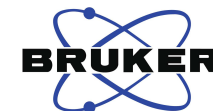

Current Data Parameters  
 NAME model Z  
 EXPNO 11  
 PROCNO 1

F2 - Acquisition Parameters  
 Date\_ 20170222  
 Time\_ 22.50  
 INSTRUM spect  
 PROBHD 5 mm PABBO BB/  
 PULPROG zg30  
 TD 65536  
 SOLVENT Acetone  
 NS 16  
 DS 2  
 SWH 12019.230 Hz  
 FIDRES 0.183399 Hz  
 AQ 2.7262976 sec  
 RG 99.18  
 DW 41.600 use  
 DE 6.50 use  
 TE 298.0 K  
 D1 1.0000000 sec  
 TD0 1

==== CHANNEL f1 =====  
 SFO1 600.1337060 MHz  
 NUC1 1H  
 P1 12.00 use  
 PLW1 22.0000000 W

F2 - Processing parameters  
 SI 65536  
 SF 600.1300118 MHz  
 WDW EM  
 SSB 0  
 LB 0.30 Hz  
 GB 0  
 PC 1.00

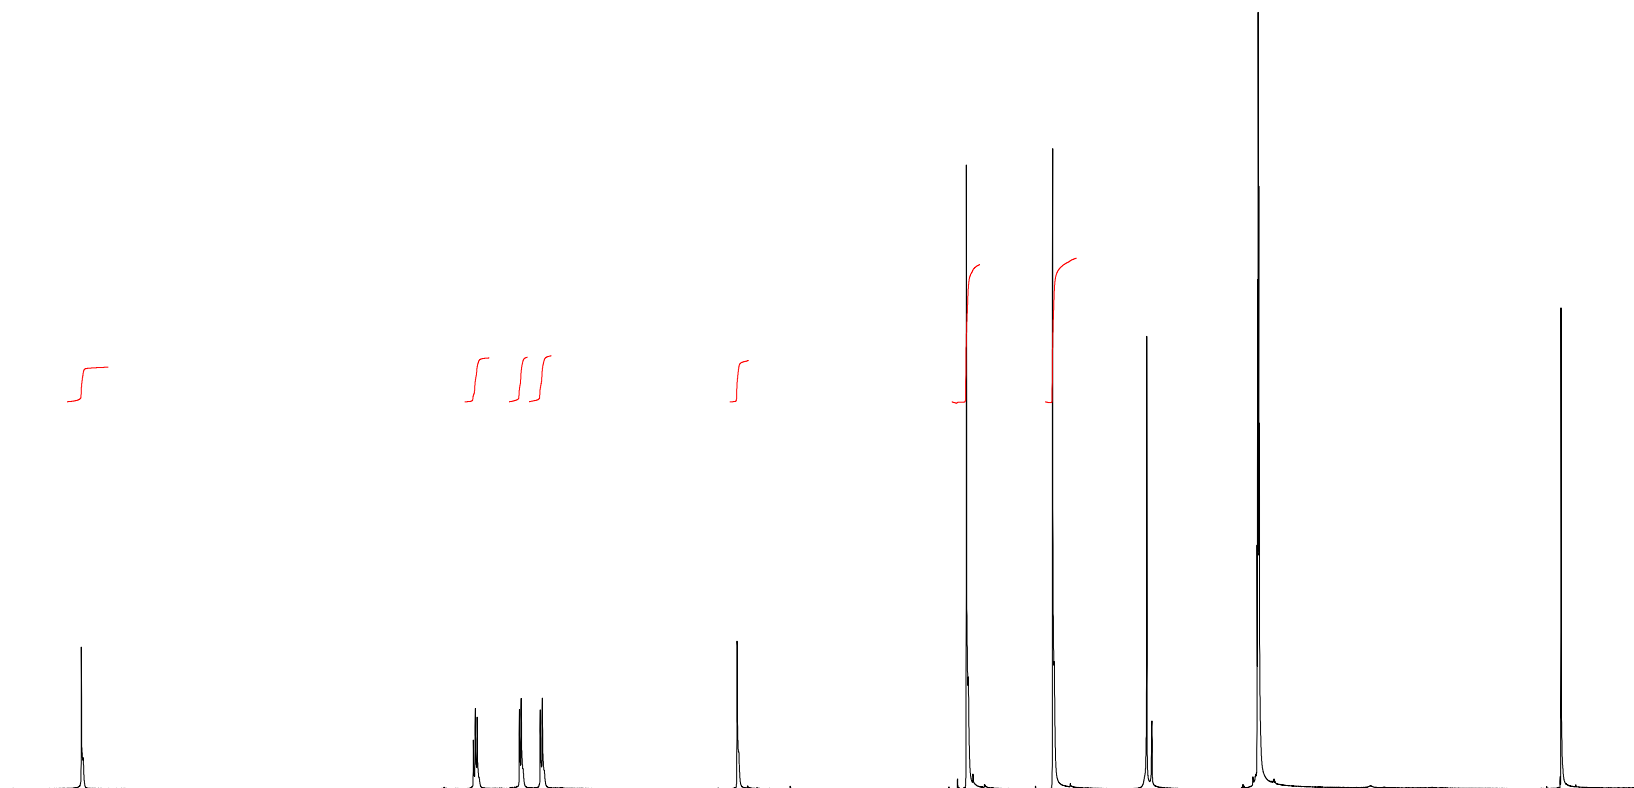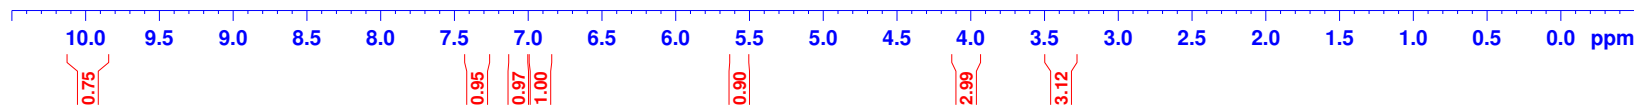

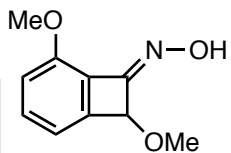

(Z)-2a

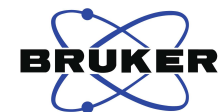

```

Current Data Parameters
NAME          model Z
EXPNO         12
PROCNO        1

F2 - Acquisition Parameters
Date_         20170223
Time          5.07
INSTRUM       spect
PROBHD        5 mm PABBO BB/
PULPROG       zgpg30
TD            65536
SOLVENT       Acetone
NS            3000
DS            4
SWH           36057.691 Hz
FIDRES        0.550197 Hz
AQ            0.9087659 sec
RG            175.56
DW            13.867 use
DE            6.50 use
TE            298.0 K
D1            2.00000000 sec
D11           0.03000000 sec
TD0           1

===== CHANNEL f1 =====
SFO1          150.9178981 MHz
NUC1           13C
P1             11.00 use
PLW1          93.00000000 W

===== CHANNEL f2 =====
SFO2          600.1324005 MHz
NUC2            1H
CPDPRG[2]     waltz16
PCPD2         70.00 use
PLW2          22.00000000 W
PLW12         0.64652997 W
PLW13         0.31680000 W

F2 - Processing parameters
SI             32768
SF            150.9026724 MHz
WDW            EM
SSB            0
LB             1.00 Hz
GB            0
PC             1.40
  
```

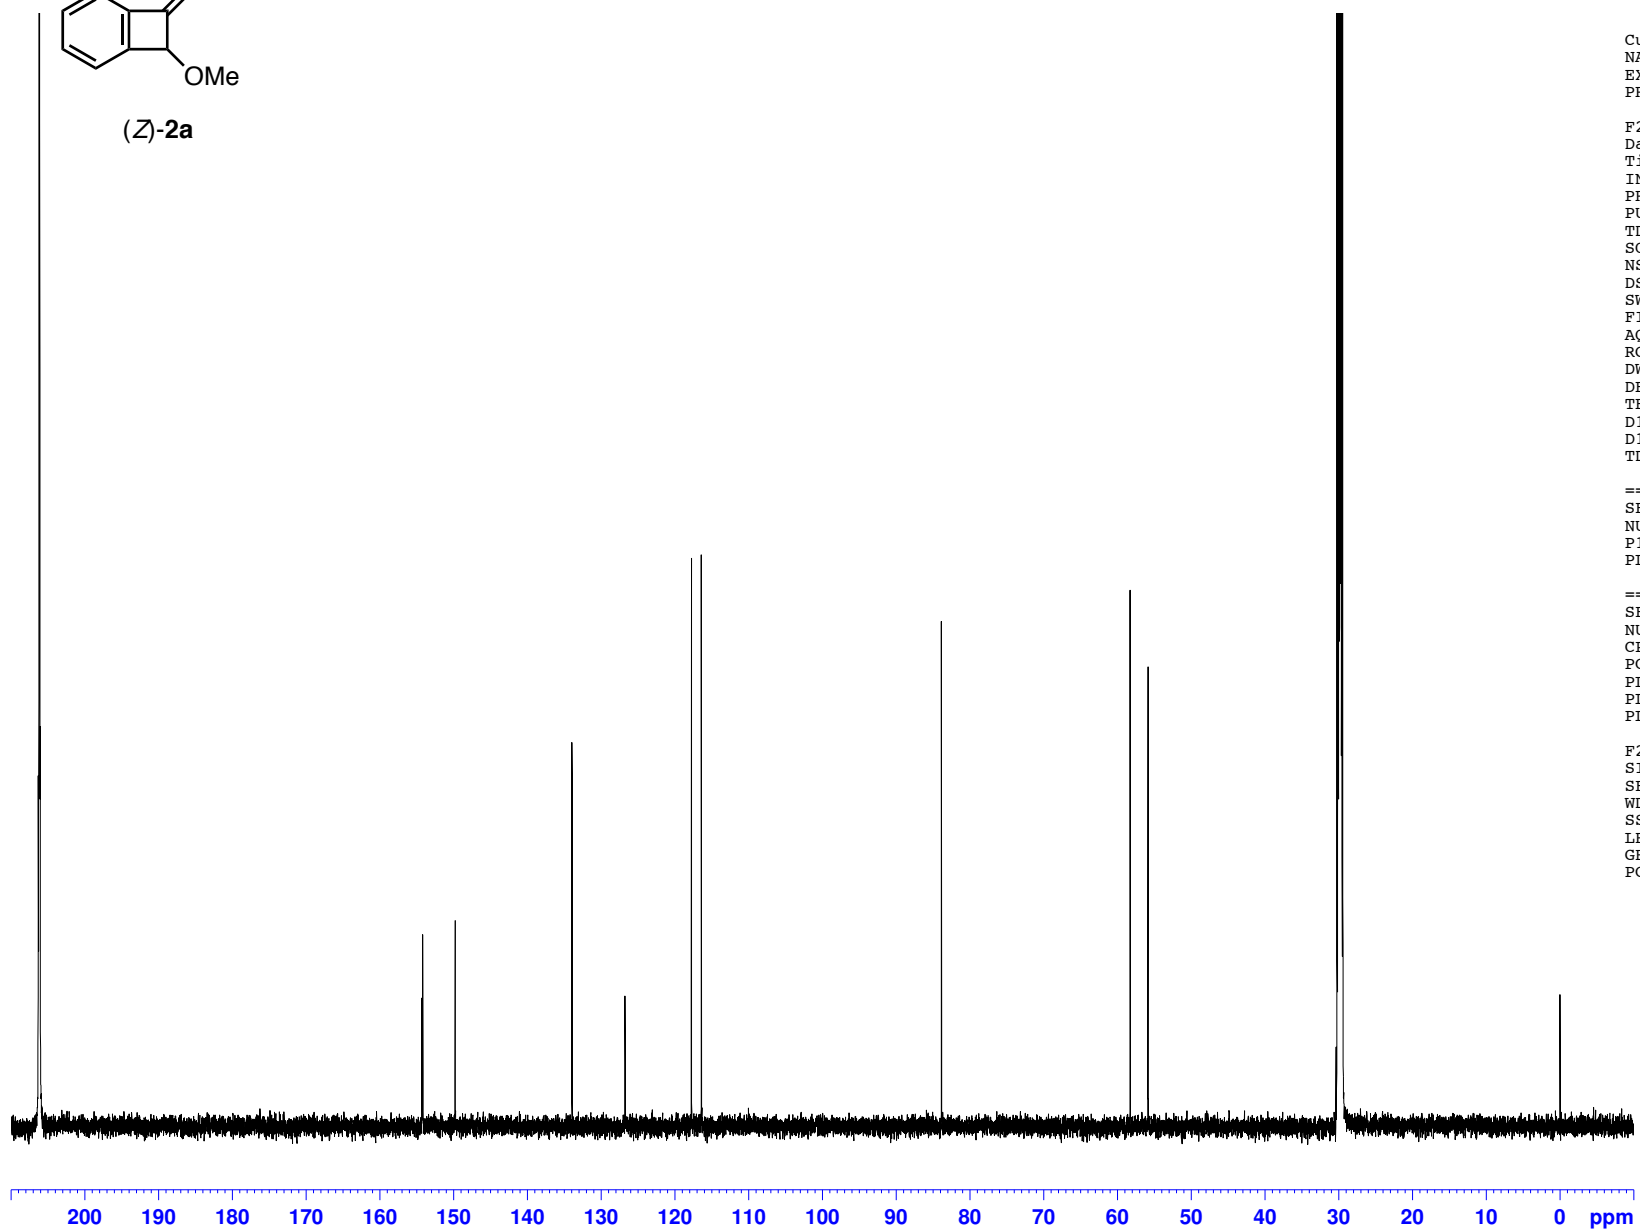

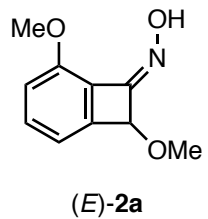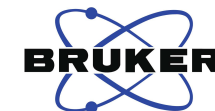

Current Data Parameters  
 NAME model E  
 EXPNO 10  
 PROCNO 1

F2 - Acquisition Parameters  
 Date\_ 20170223  
 Time\_ 0.02  
 INSTRUM spect  
 PROBHD 5 mm PABBO BB/  
 PULPROG zg30  
 TD 65536  
 SOLVENT Acetone  
 NS 16  
 DS 2  
 SWH 12019.230 Hz  
 FIDRES 0.183399 Hz  
 AQ 2.7262976 sec  
 RG 87.68  
 DW 41.600 use  
 DE 6.50 use  
 TE 298.0 K  
 D1 1.0000000 sec  
 TD0 1

===== CHANNEL f1 =====  
 SFO1 600.1337060 MHz  
 NUC1 1H  
 P1 12.00 use  
 PLW1 22.0000000 W

F2 - Processing parameters  
 SI 65536  
 SF 600.1300112 MHz  
 WDW EM  
 SSB 0  
 LB 0.30 Hz  
 GB 0  
 PC 1.00

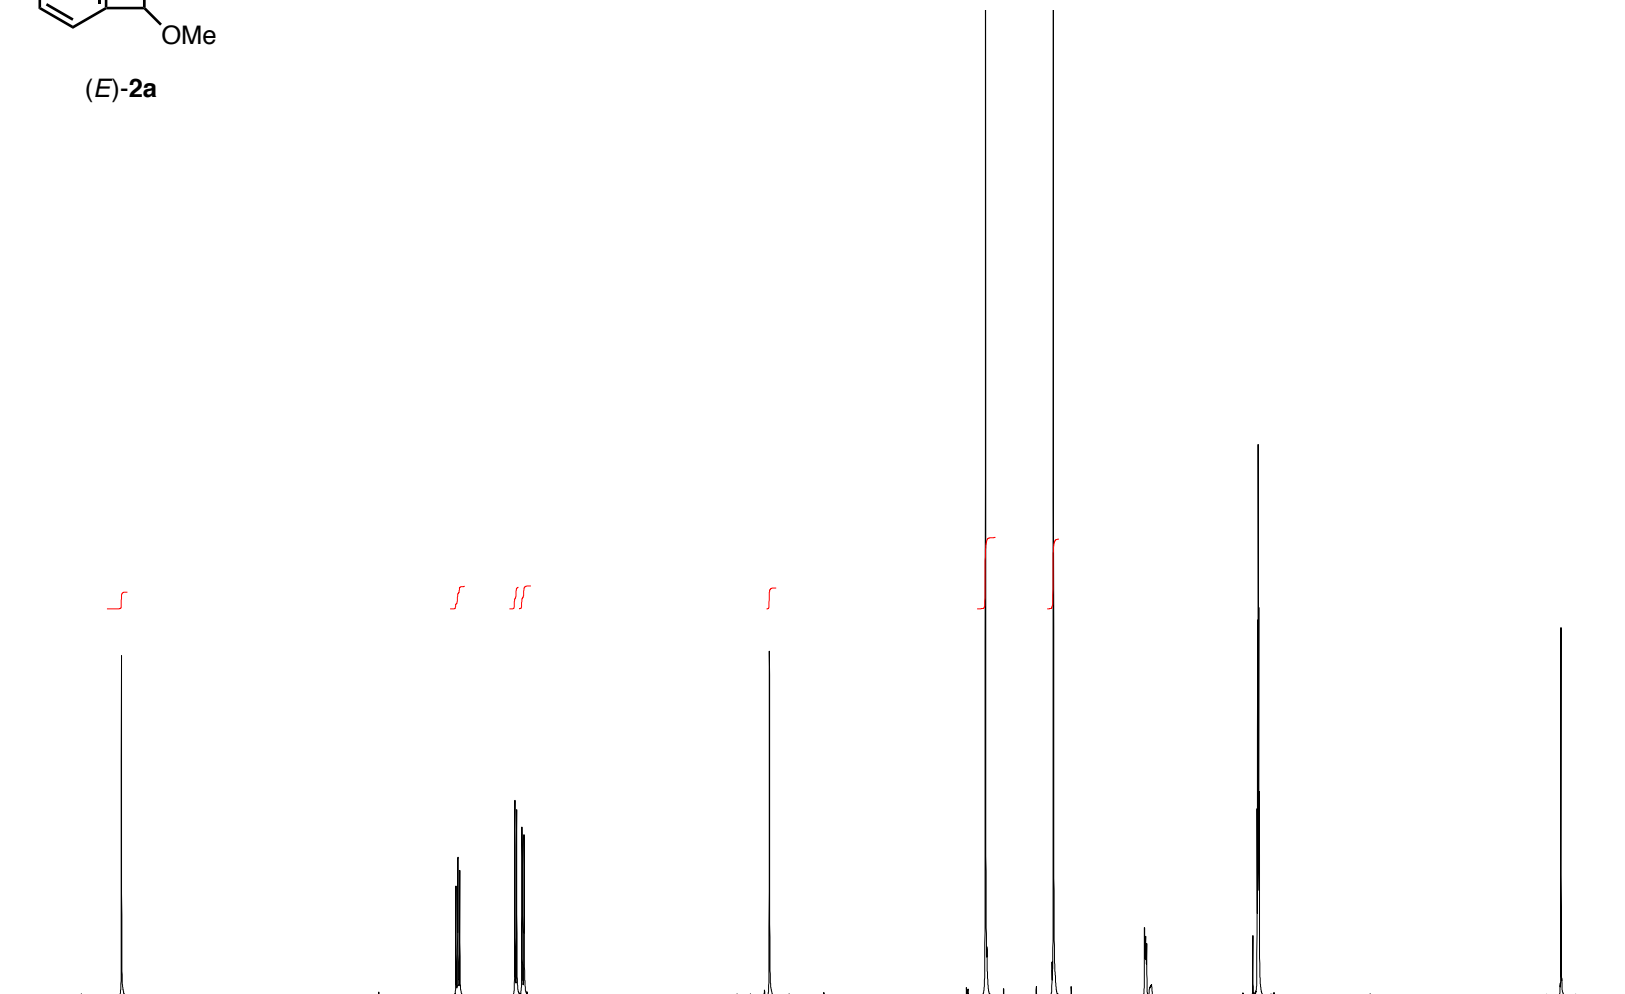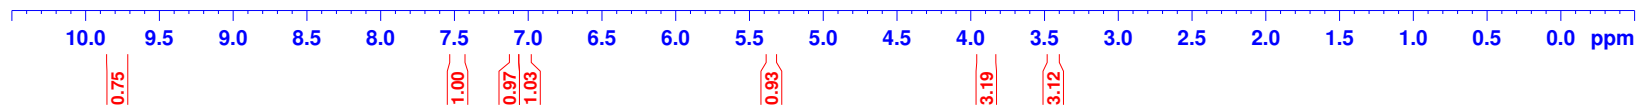

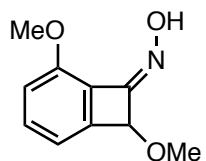

(E)-2a

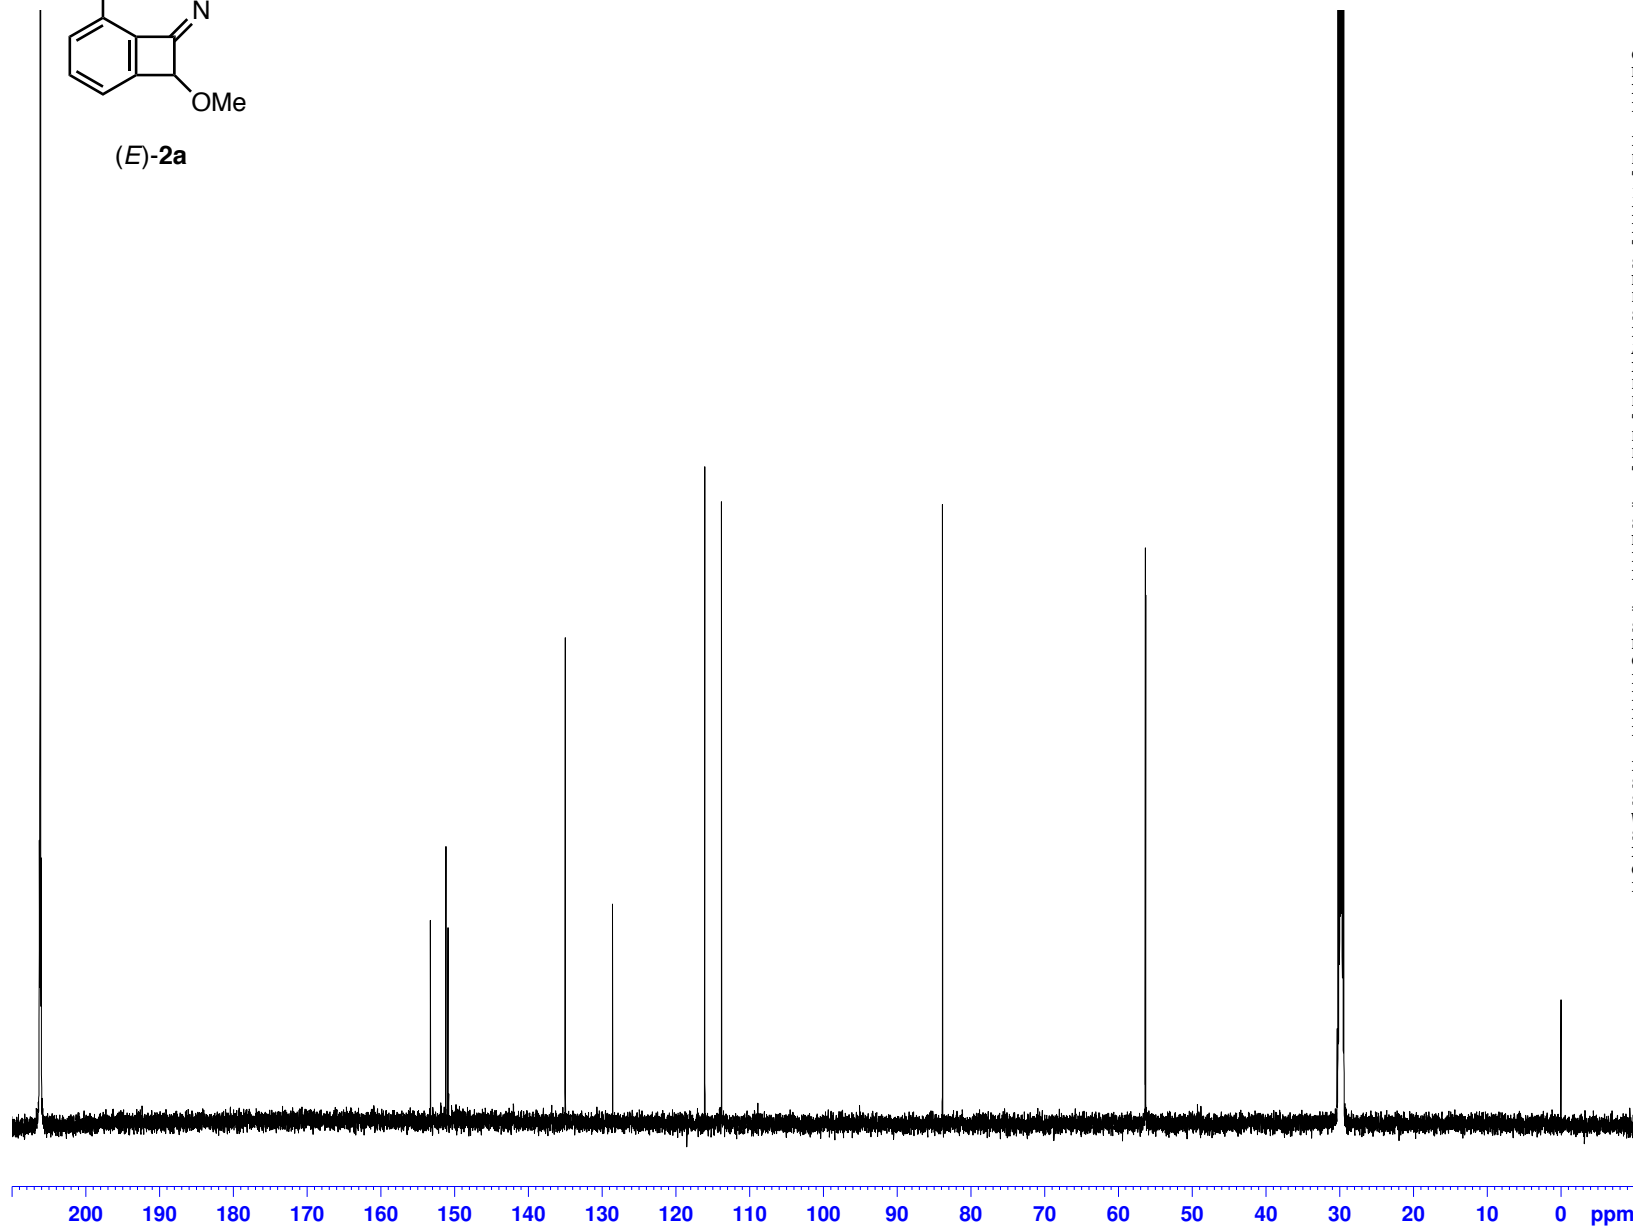

Current Data Parameters  
 NAME model E  
 EXPNO 20  
 PROCNO 1

F2 - Acquisition Parameters  
 Date\_ 20170223  
 Time\_ 9.23  
 INSTRUM spect  
 PROBHD 5 mm PABBO BB/  
 PULPROG zgpg30  
 TD 65536  
 SOLVENT Acetone  
 NS 2000  
 DS 4  
 SWH 36057.691 Hz  
 FIDRES 0.550197 Hz  
 AQ 0.9087659 sec  
 RG 175.56  
 DW 13.867 use  
 DE 6.50 use  
 TE 298.0 K  
 D1 2.0000000 sec  
 D11 0.0300000 sec  
 TD0 1

==== CHANNEL f1 =====  
 SFO1 150.9178981 MHz  
 NUC1 13C  
 P1 11.00 use  
 PLW1 93.0000000 W

==== CHANNEL f2 =====  
 SFO2 600.1324005 MHz  
 NUC2 1H  
 CPDPRG[2] waltz16  
 PCPD2 70.00 use  
 PLW2 22.0000000 W  
 PLW12 0.64652997 W  
 PLW13 0.31680000 W

F2 - Processing parameters  
 SI 32768  
 SF 150.9026725 MHz  
 WDW EM  
 SSB 0  
 LB 1.00 Hz  
 GB 0  
 PC 1.40

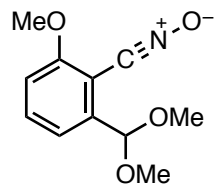

3a

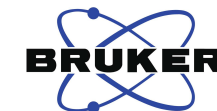

Current Data Parameters  
 NAME model nitori  
 EXPNO 10  
 PROCNO 1

F2 - Acquisition Parameters  
 Date\_ 20170222  
 Time\_ 17.22  
 INSTRUM spect  
 PROBHD 5 mm PABBO BB/  
 PULPROG zg30  
 TD 65536  
 SOLVENT CDC13  
 NS 16  
 DS 2  
 SWH 12019.230 Hz  
 FIDRES 0.183399 Hz  
 AQ 2.7262976 sec  
 RG 114  
 DW 41.600 use  
 DE 6.50 use  
 TE 298.0 K  
 D1 1.0000000 sec  
 TD0 1

==== CHANNEL f1 =====  
 SFO1 600.1337060 MHz  
 NUC1 1H  
 P1 12.00 use  
 PLW1 22.0000000 W

F2 - Processing parameters  
 SI 65536  
 SF 600.1300177 MHz  
 WDW EM  
 SSB 0  
 LB 0.30 Hz  
 GB 0  
 PC 1.00

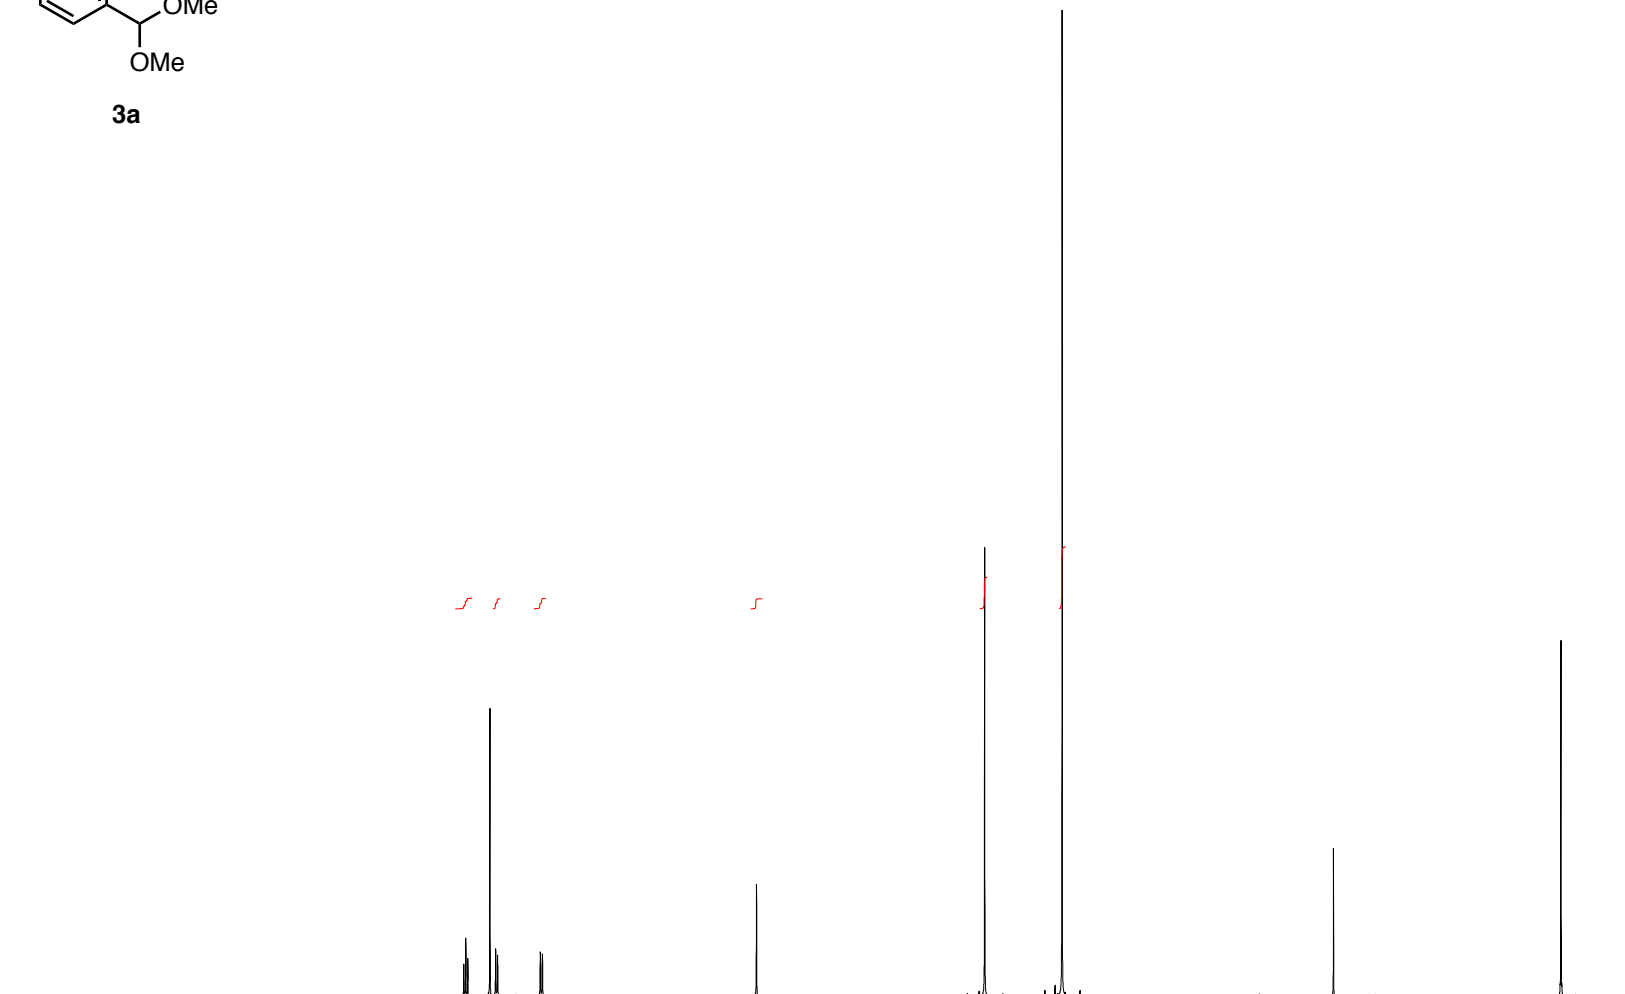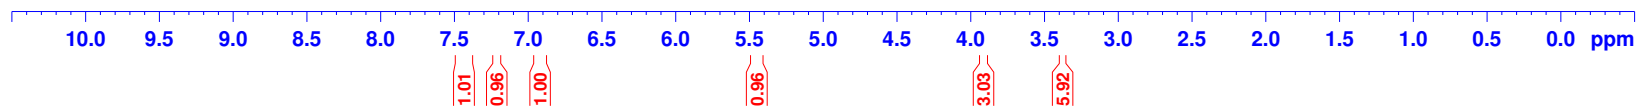



3a

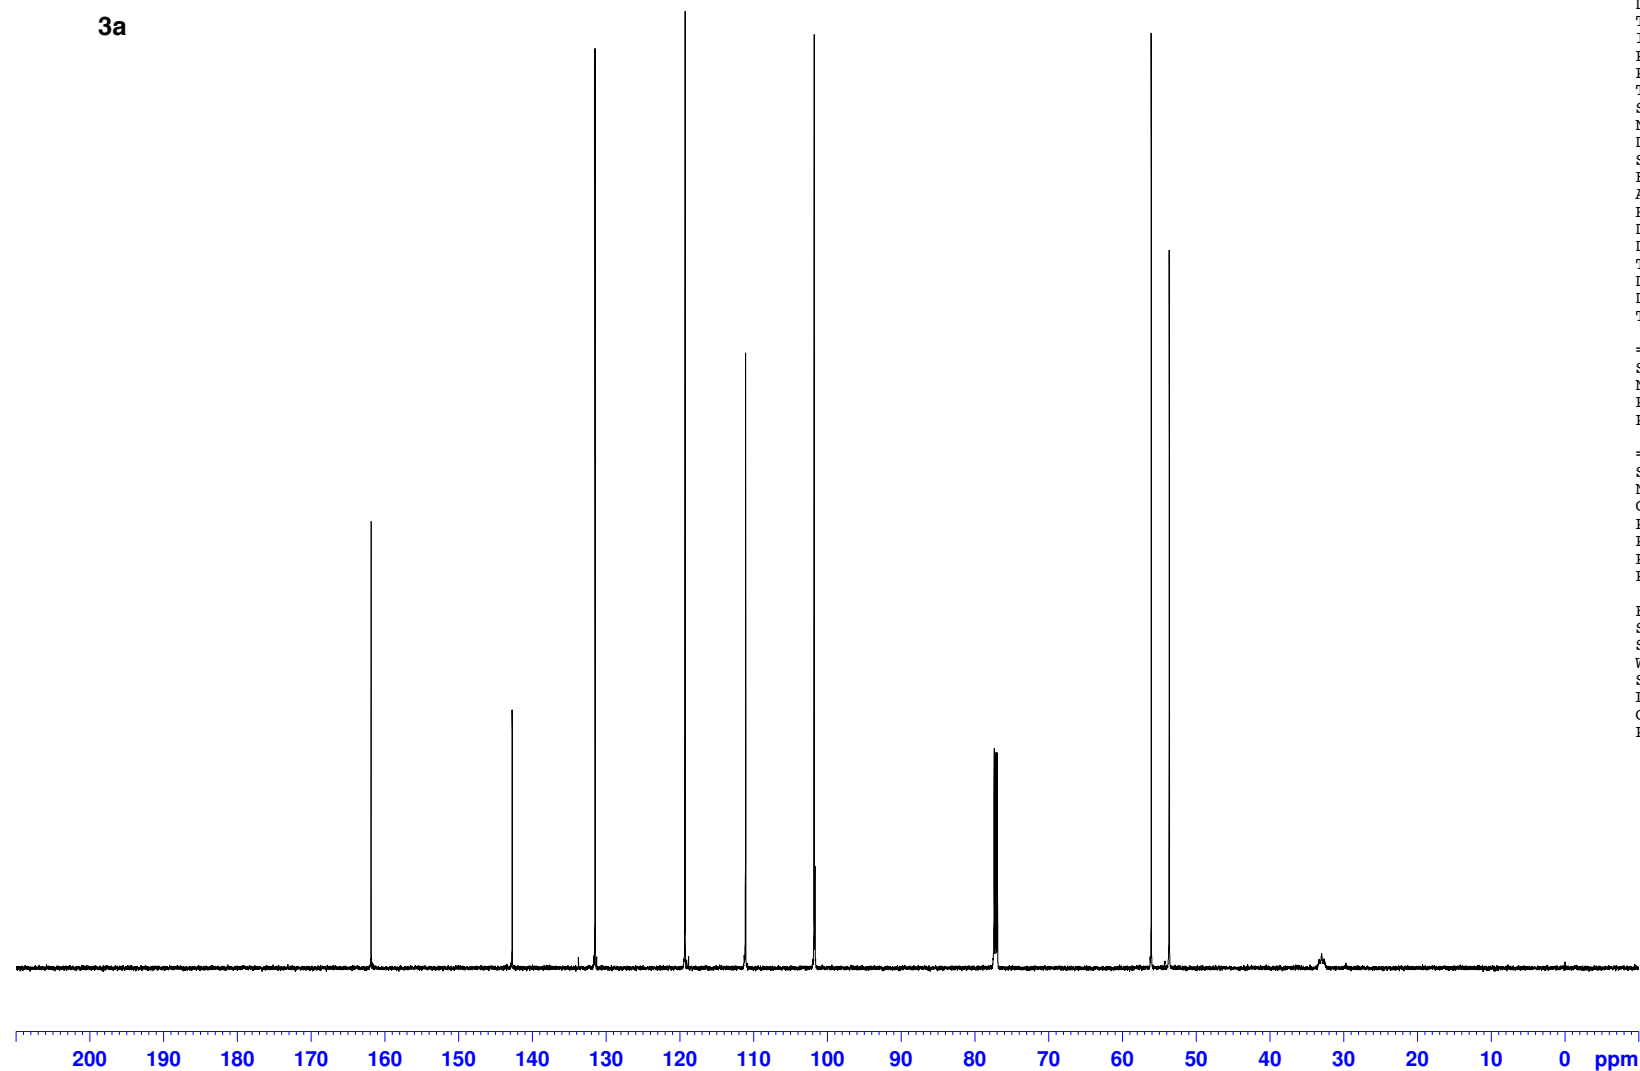

Current Data Parameters  
 NAME model nitori  
 EXPNO 20  
 PROCNO 1

F2 - Acquisition Parameters  
 Date\_ 20170222  
 Time\_ 17.55  
 INSTRUM spect  
 PROBHD 5 mm PABBO BB/  
 PULPROG zgpg30  
 TD 65536  
 SOLVENT CDC13  
 NS 600  
 DS 4  
 SWH 36057.691 Hz  
 FIDRES 0.550197 Hz  
 AQ 0.9087659 sec  
 RG 175.56  
 DW 13.867 use  
 DE 6.50 use  
 TE 298.0 K  
 D1 2.0000000 sec  
 D11 0.0300000 sec  
 TD0 1

==== CHANNEL f1 =====  
 SFO1 150.9178981 MHz  
 NUC1 13C  
 P1 11.00 use  
 PLW1 93.0000000 W

==== CHANNEL f2 =====  
 SFO2 600.1324005 MHz  
 NUC2 1H  
 CPDPRG[2] waltz16  
 PCPD2 70.00 use  
 PLW2 22.0000000 W  
 PLW12 0.64652997 W  
 PLW13 0.31680000 W

F2 - Processing parameters  
 SI 32768  
 SF 150.9028043 MHz  
 WDW EM  
 SSB 0  
 LB 1.00 Hz  
 GB 0  
 PC 1.40

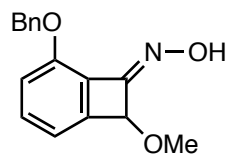

(Z)-2b

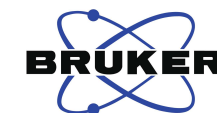

Current Data Parameters  
 NAME rs3-31-10  
 EXPNO 10  
 PROCNO 1

F2 - Acquisition Parameters  
 Date\_ 20150430  
 Time\_ 23.57  
 INSTRUM spect  
 PROBHD 5 mm CPPBBO BB  
 PULPROG zg30  
 TD 65536  
 SOLVENT Acetone  
 NS 16  
 DS 2  
 SWH 12019.230 Hz  
 FIDRES 0.183399 Hz  
 AQ 2.7262976 sec  
 RG 31.94  
 DW 41.600 use  
 DE 10.00 use  
 TE 300.0 K  
 D1 1.00000000 sec  
 TD0 1

==== CHANNEL f1 =====  
 SFO1 600.1337060 MHz  
 NUC1 1H  
 P1 12.00 use  
 PLW1 23.00000000 W

F2 - Processing parameters  
 SI 65536  
 SF 600.1300113 MHz  
 WDW EM  
 SSB 0  
 LB 0.30 Hz  
 GB 0  
 PC 1.00

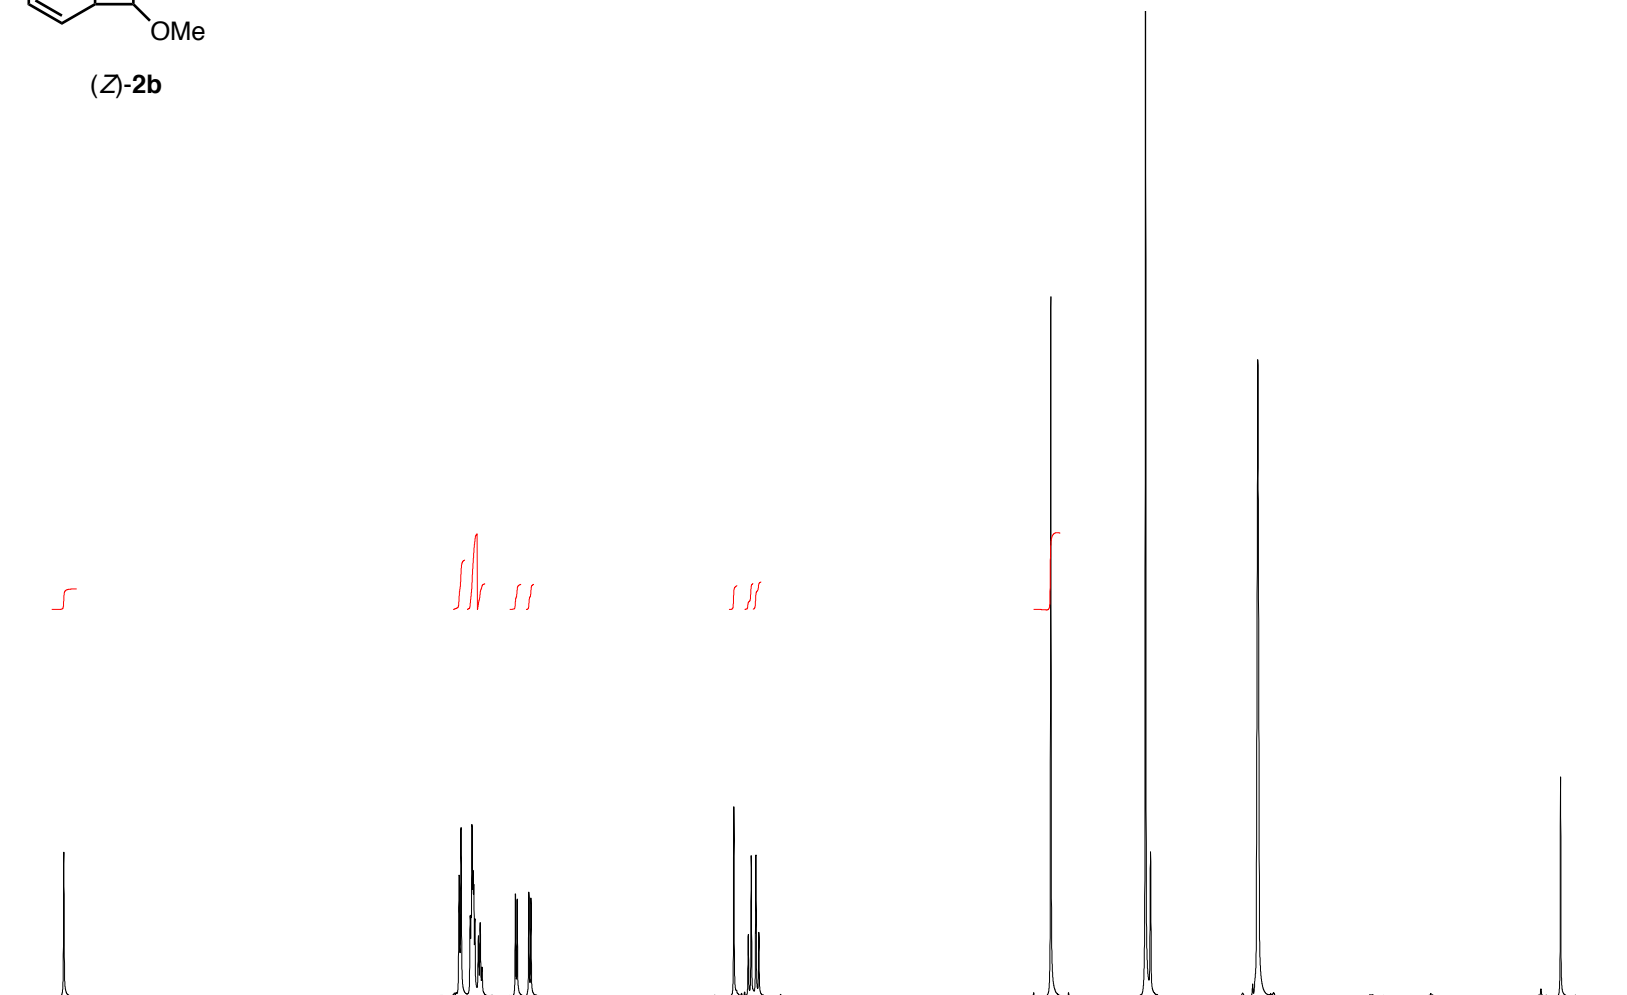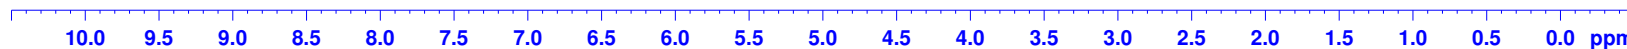

0.82  
 1.97 3.08 1.02 1.00 1.00  
 0.95 1.04 1.10  
 3.04

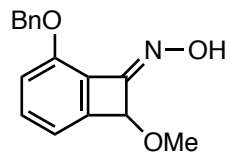

(Z)-2b

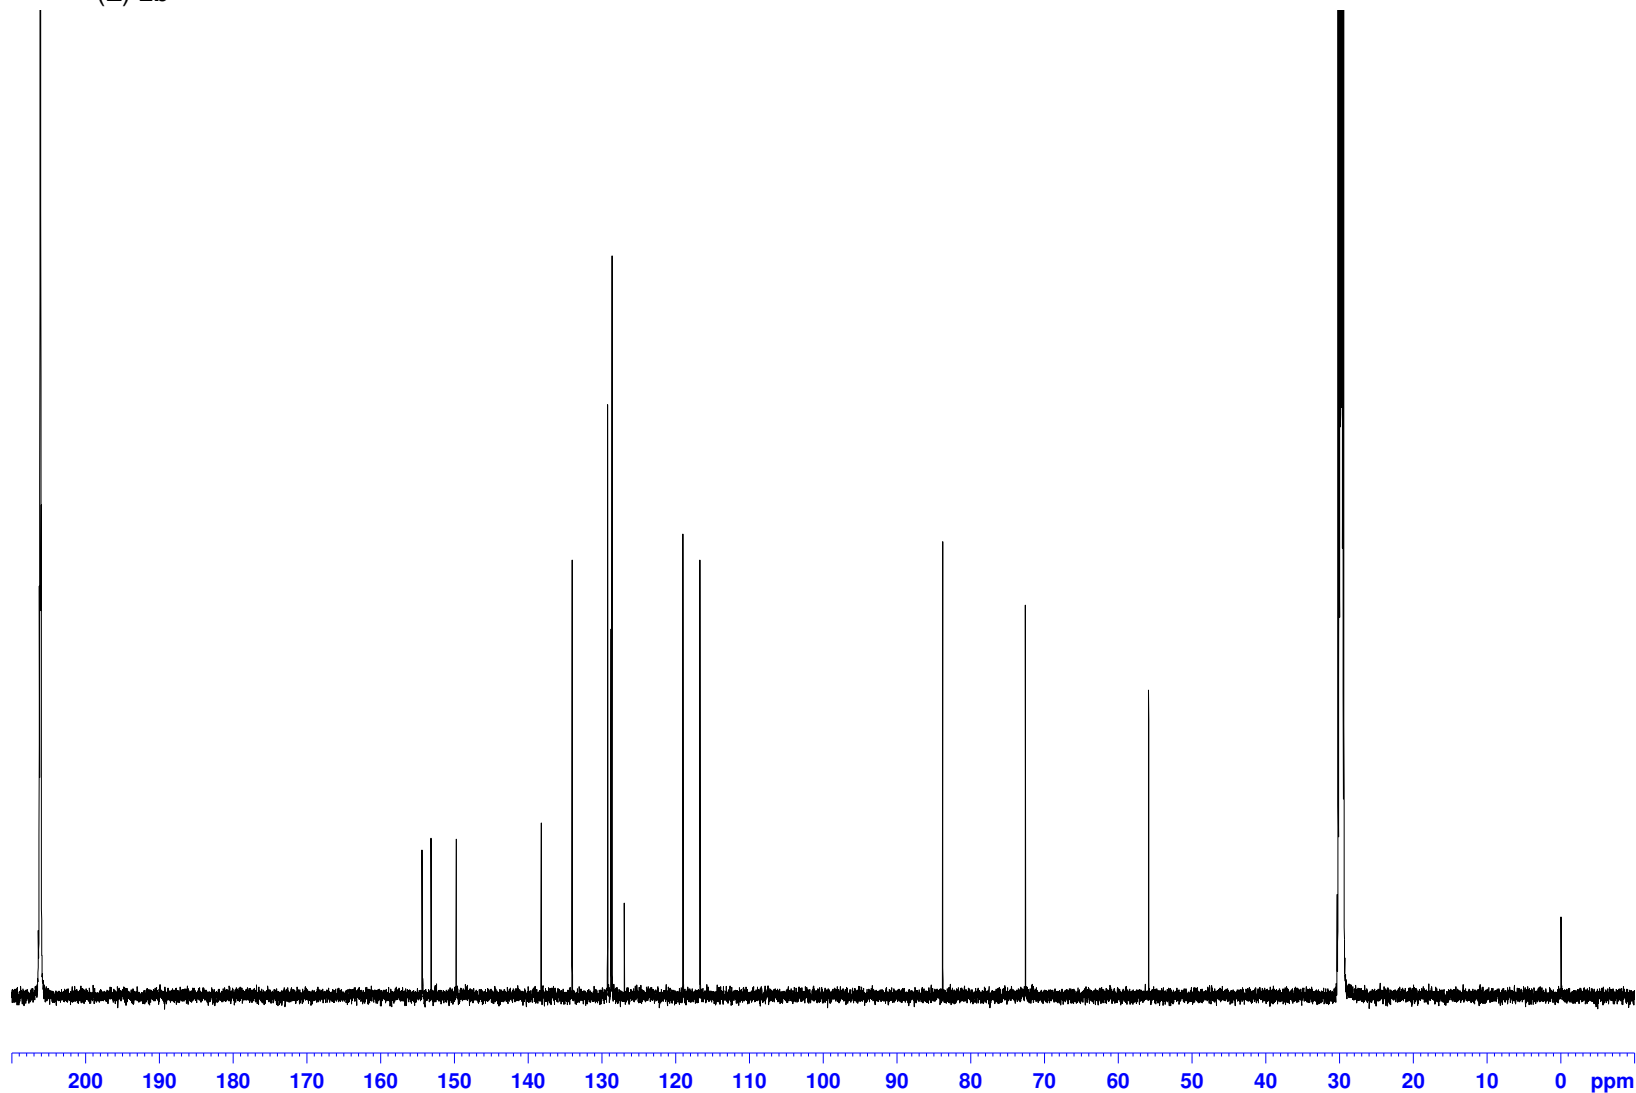

Current Data Parameters  
 NAME rs3-31-10  
 EXPNO 11  
 PROCNO 1

F2 - Acquisition Parameters  
 Date\_ 20150501  
 Time\_ 2.01  
 INSTRUM spect  
 PROBHD 5 mm CPPBBO BB  
 PULPROG zgpg30  
 TD 65536  
 SOLVENT Acetone  
 NS 1024  
 DS 4  
 SWH 36057.691 Hz  
 FIDRES 0.550197 Hz  
 AQ 0.9087659 sec  
 RG 175.56  
 DW 13.867 use  
 DE 18.00 use  
 TE 300.0 K  
 D1 2.0000000 sec  
 D11 0.0300000 sec  
 TD0 1

==== CHANNEL f1 =====  
 SFO1 150.9178981 MHz  
 NUC1 13C  
 P1 10.00 use  
 PLW1 70.0000000 W

==== CHANNEL f2 =====  
 SFO2 600.1324005 MHz  
 NUC2 1H  
 CPDPRG[2] waltz16  
 PCPD2 70.00 use  
 PLW2 26.0000000 W  
 PLW12 0.76407999 W  
 PLW13 0.37439999 W

F2 - Processing parameters  
 SI 32768  
 SF 150.9026725 MHz  
 WDW EM  
 SSB 0  
 LB 1.00 Hz  
 GB 0  
 PC 1.40



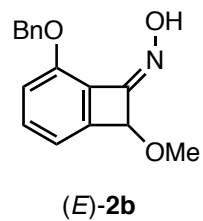

Current Data Parameters  
 NAME Bn oxime E  
 EXPNO 10  
 PROCNO 1

F2 - Acquisition Parameters  
 Date\_ 20170121  
 Time\_ 18.51  
 INSTRUM spect  
 PROBHD 5 mm PABBO BB/  
 PULPROG zg30  
 TD 65536  
 SOLVENT Acetone  
 NS 16  
 DS 2  
 SWH 12019.230 Hz  
 FIDRES 0.183399 Hz  
 AQ 2.7262976 sec  
 RG 83.7  
 DW 41.600 use  
 DE 6.50 use  
 TE 298.0 K  
 D1 1.0000000 sec  
 TD0 1

===== CHANNEL f1 =====  
 SFO1 600.1337060 MHz  
 NUC1 1H  
 P1 12.00 use  
 PLW1 22.0000000 W

F2 - Processing parameters  
 SI 65536  
 SF 600.1300125 MHz  
 WDW EM  
 SSB 0  
 LB 0.30 Hz  
 GB 0  
 PC 1.00

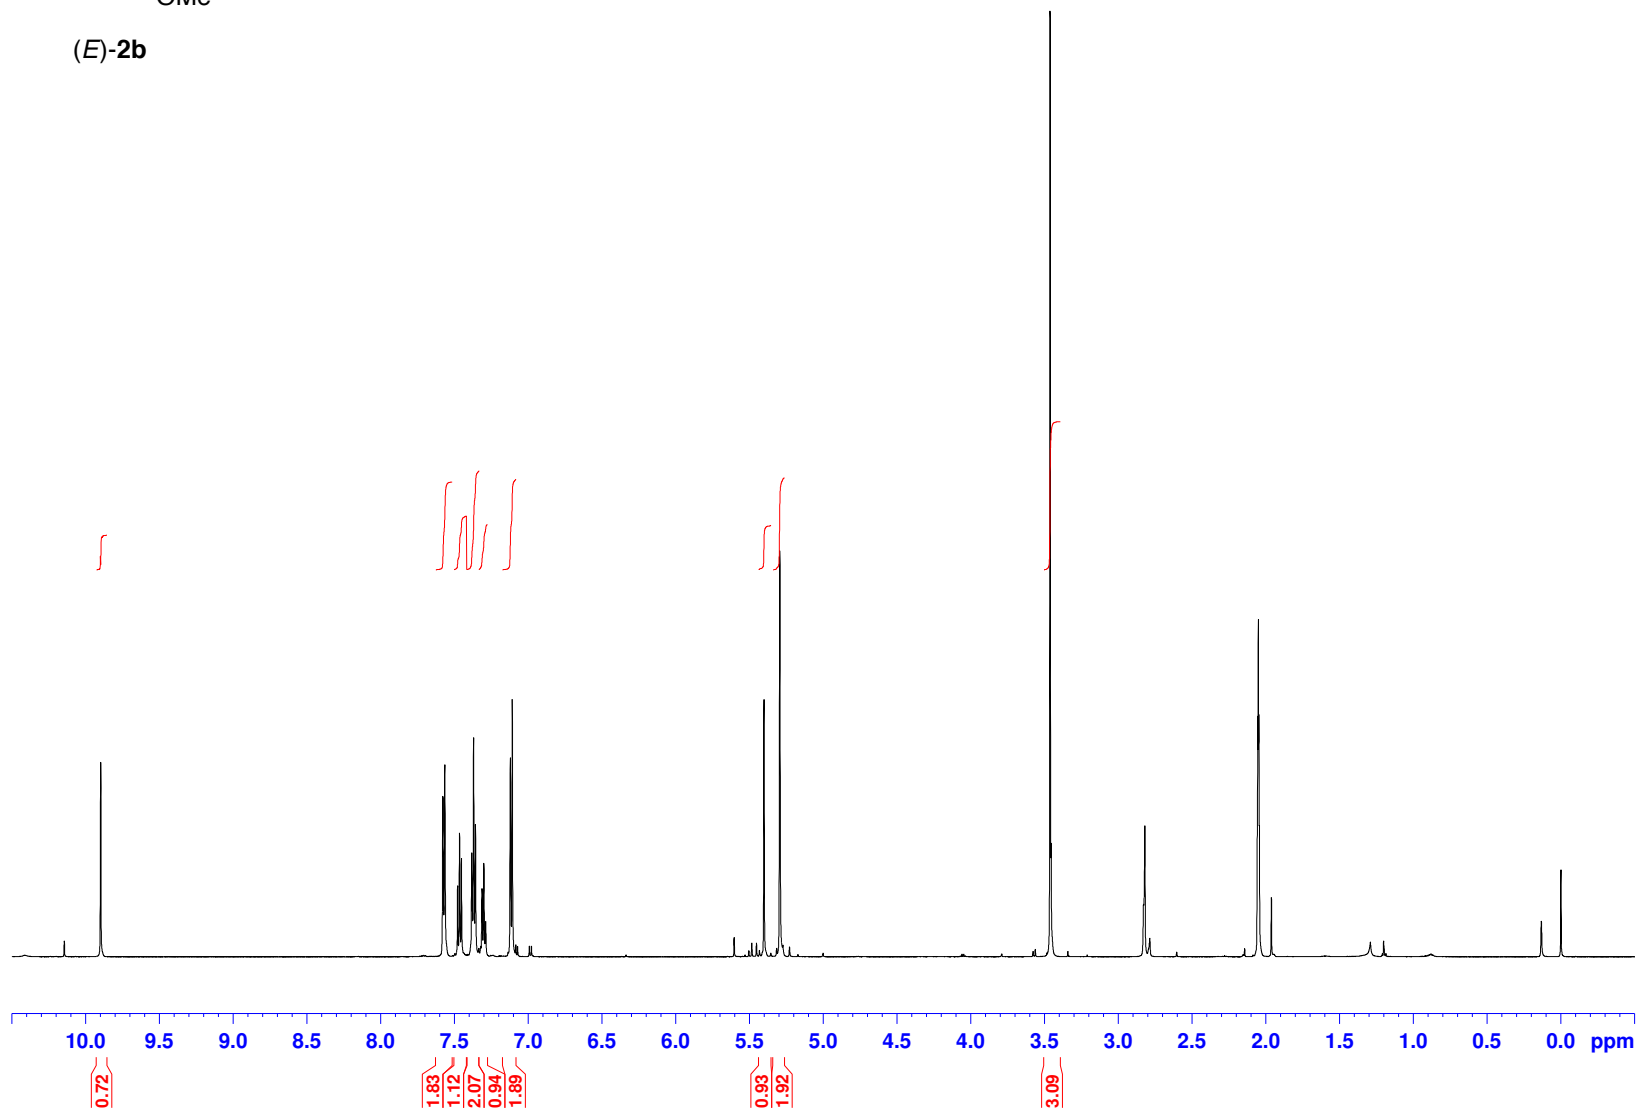

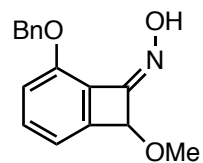

(E)-2b

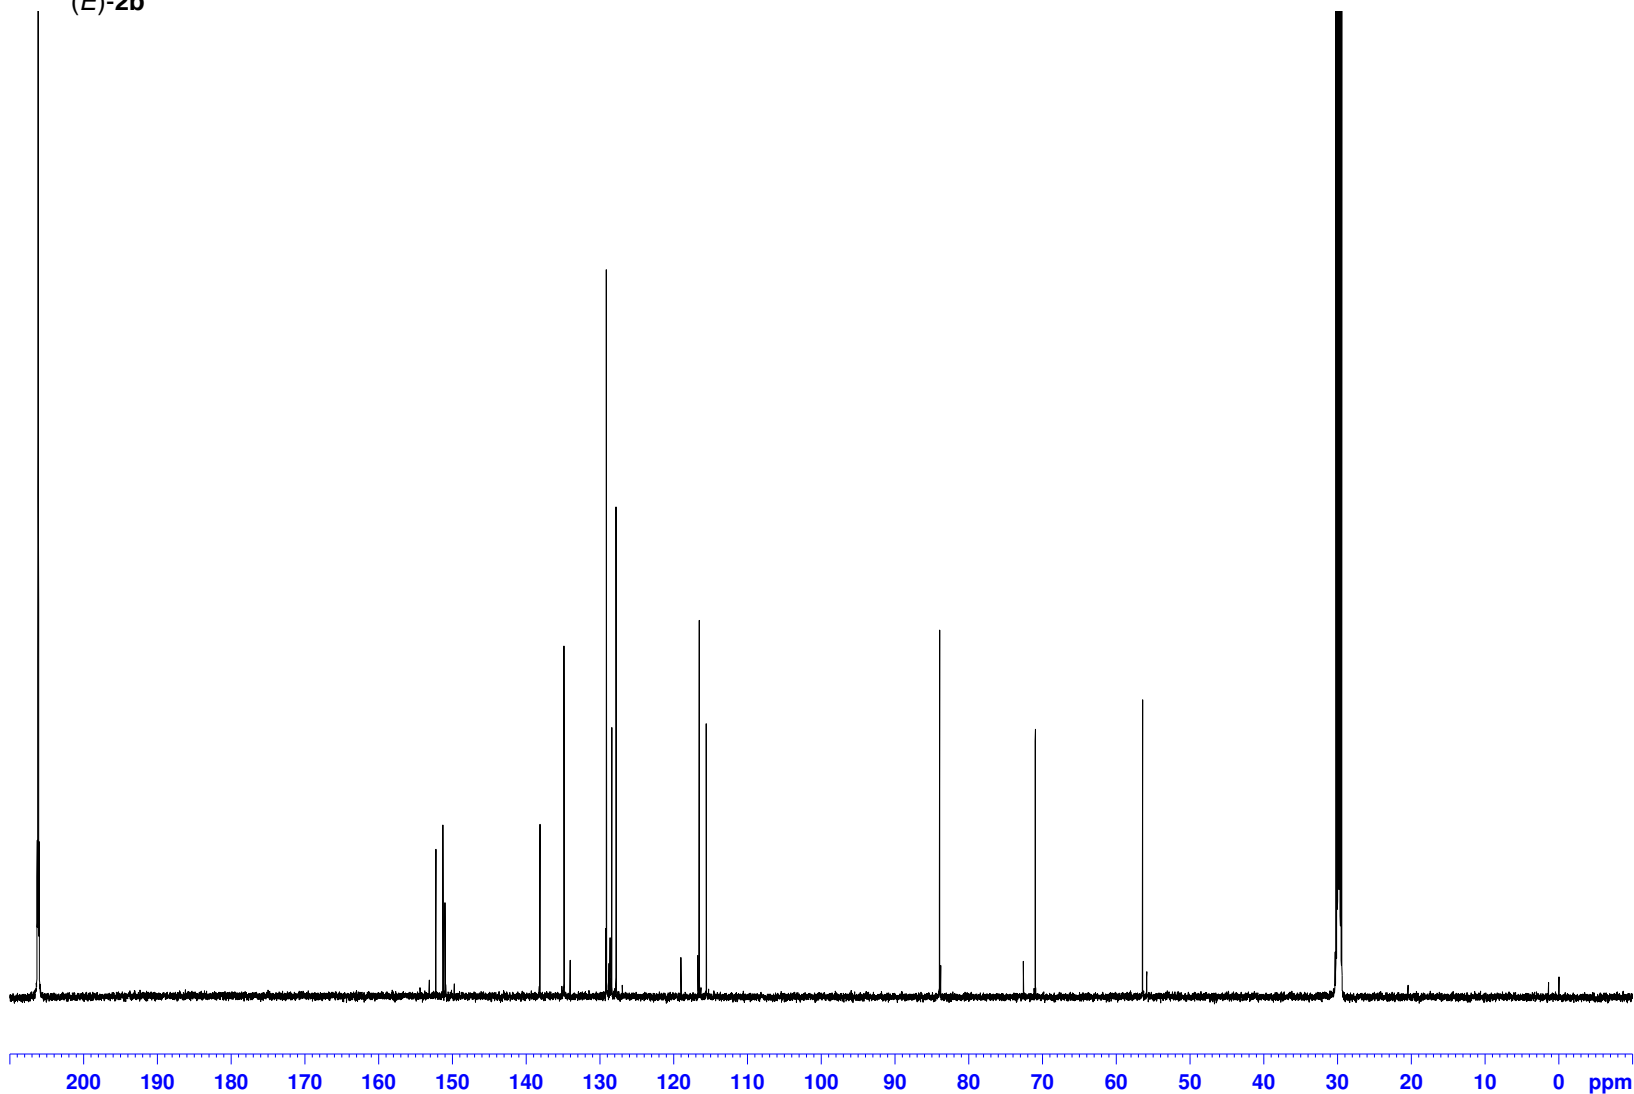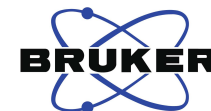

Current Data Parameters  
 NAME Bn oxime E  
 EXPNO 11  
 PROCNO 1

F2 - Acquisition Parameters  
 Date\_ 20170124  
 Time\_ 8.56  
 INSTRUM spect  
 PROBHD 5 mm PABBO BB/  
 PULPROG zgpg30  
 TD 65536  
 SOLVENT Acetone  
 NS 3500  
 DS 4  
 SWH 36057.691 Hz  
 FIDRES 0.550197 Hz  
 AQ 0.9087659 sec  
 RG 175.56  
 DW 13.867 use  
 DE 6.50 use  
 TE 298.0 K  
 D1 2.0000000 sec  
 D11 0.0300000 sec  
 TD0 1

==== CHANNEL f1 =====  
 SFO1 150.9178981 MHz  
 NUC1 13C  
 P1 11.00 use  
 PLW1 93.0000000 W

==== CHANNEL f2 =====  
 SFO2 600.1324005 MHz  
 NUC2 1H  
 CPDPRG[2] waltz16  
 PCPD2 70.00 use  
 PLW2 22.0000000 W  
 PLW12 0.64652997 W  
 PLW13 0.31680000 W

F2 - Processing parameters  
 SI 32768  
 SF 150.9026735 MHz  
 WDW EM  
 SSB 0  
 LB 1.00 Hz  
 GB 0  
 PC 1.40

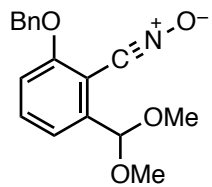

**3b**



Current Data Parameters  
 NAME rs3-161-1  
 EXPNO 10  
 PROCNO 1

F2 - Acquisition Parameters  
 Date\_ 20150601  
 Time\_ 16.44  
 INSTRUM spect  
 PROBHD 5 mm CPPBBO BB  
 PULPROG zg30  
 TD 65536  
 SOLVENT CDC13  
 NS 16  
 DS 2  
 SWH 12019.230 Hz  
 FIDRES 0.183399 Hz  
 AQ 2.7262976 sec  
 RG 31.94  
 DW 41.600 use  
 DE 10.00 use  
 TE 291.5 K  
 D1 1.0000000 sec  
 TD0 1

==== CHANNEL f1 =====  
 SFO1 600.1337060 MHz  
 NUC1 1H  
 P1 12.00 use  
 PLW1 23.0000000 W

F2 - Processing parameters  
 SI 65536  
 SF 600.1300155 MHz  
 WDW EM  
 SSB 0  
 LB 0.30 Hz  
 GB 0  
 PC 1.00

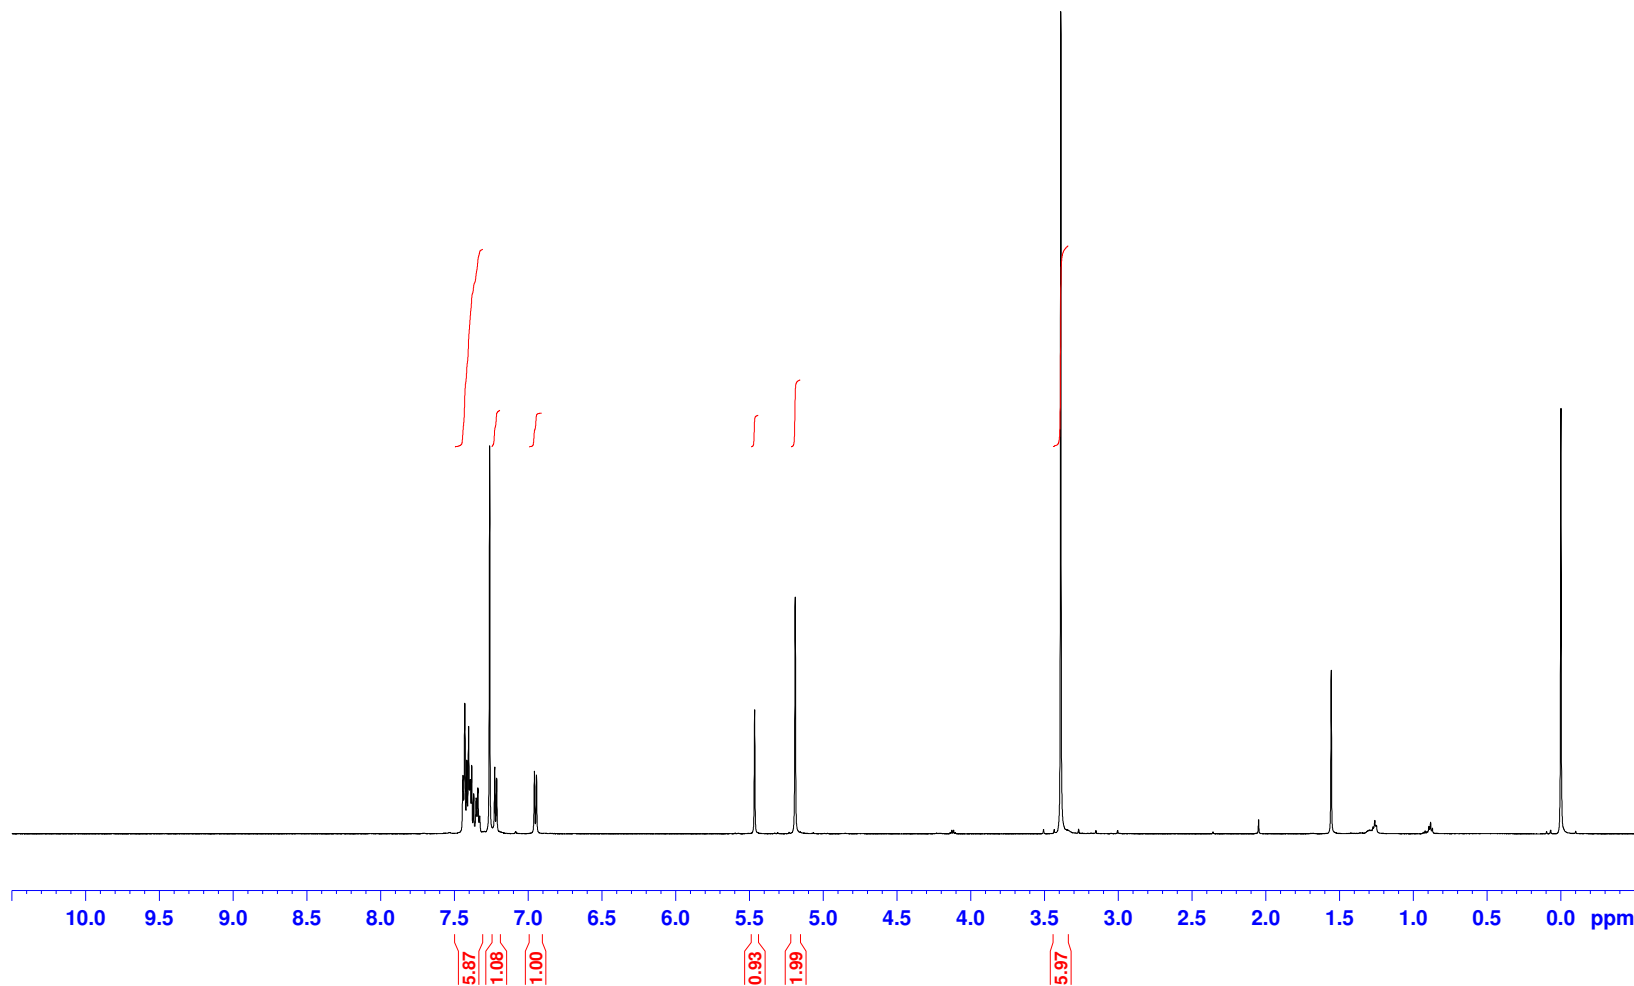



3b

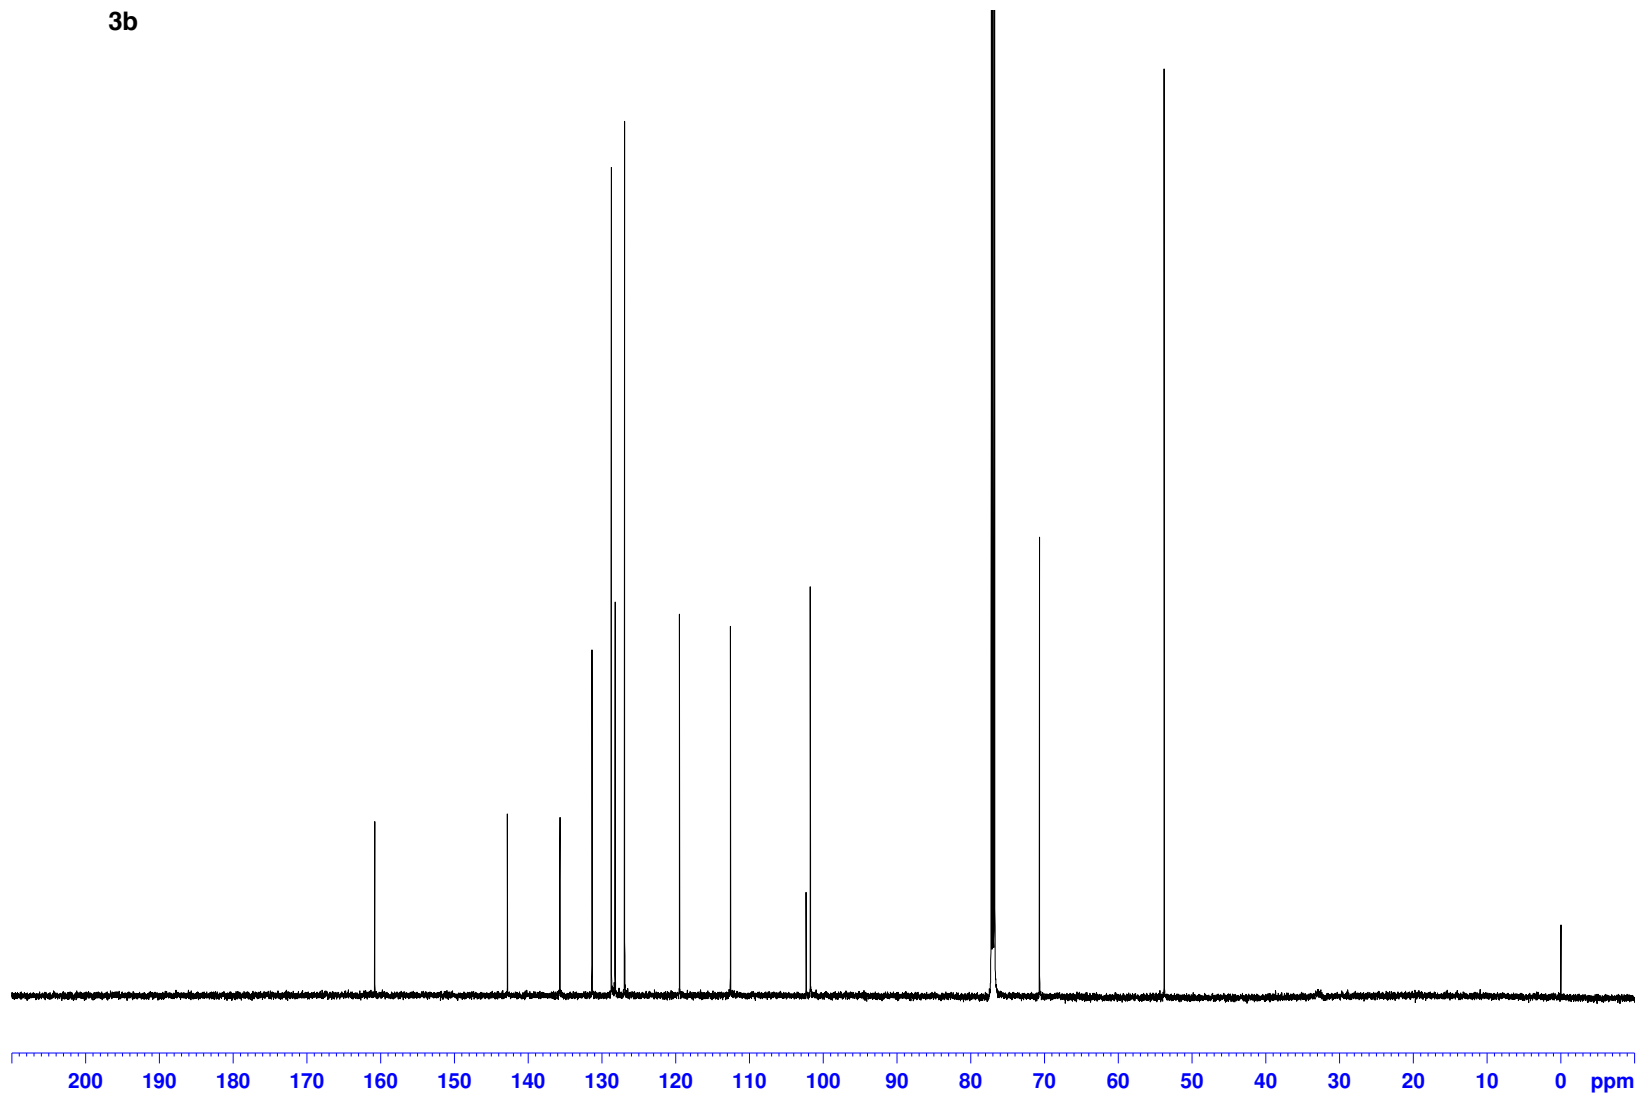

Current Data Parameters  
 NAME rs3-161-1  
 EXPNO 21  
 PROCNO 1

F2 - Acquisition Parameters  
 Date\_ 20150602  
 Time\_ 1.53  
 INSTRUM spect  
 PROBHD 5 mm CPPBBO BB  
 PULPROG zgpg30  
 TD 65536  
 SOLVENT CDCl3  
 NS 1024  
 DS 4  
 SWH 36057.691 Hz  
 FIDRES 0.550197 Hz  
 AQ 0.9087659 sec  
 RG 175.56  
 DW 13.867 use  
 DE 18.00 use  
 TE 291.5 K  
 D1 2.0000000 sec  
 D11 0.0300000 sec  
 TD0 1

==== CHANNEL f1 =====  
 SFO1 150.9178981 MHz  
 NUC1 13C  
 P1 10.00 use  
 PLW1 70.0000000 W

==== CHANNEL f2 =====  
 SFO2 600.1324005 MHz  
 NUC2 1H  
 CPDPRG[2] waltz16  
 PCPD2 70.00 use  
 PLW2 26.0000000 W  
 PLW12 0.76407999 W  
 PLW13 0.37439999 W

F2 - Processing parameters  
 SI 32768  
 SF 150.9028128 MHz  
 WDW EM  
 SSB 0  
 LB 1.00 Hz  
 GB 0  
 PC 1.40

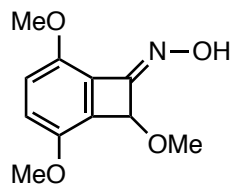

(Z)-2c

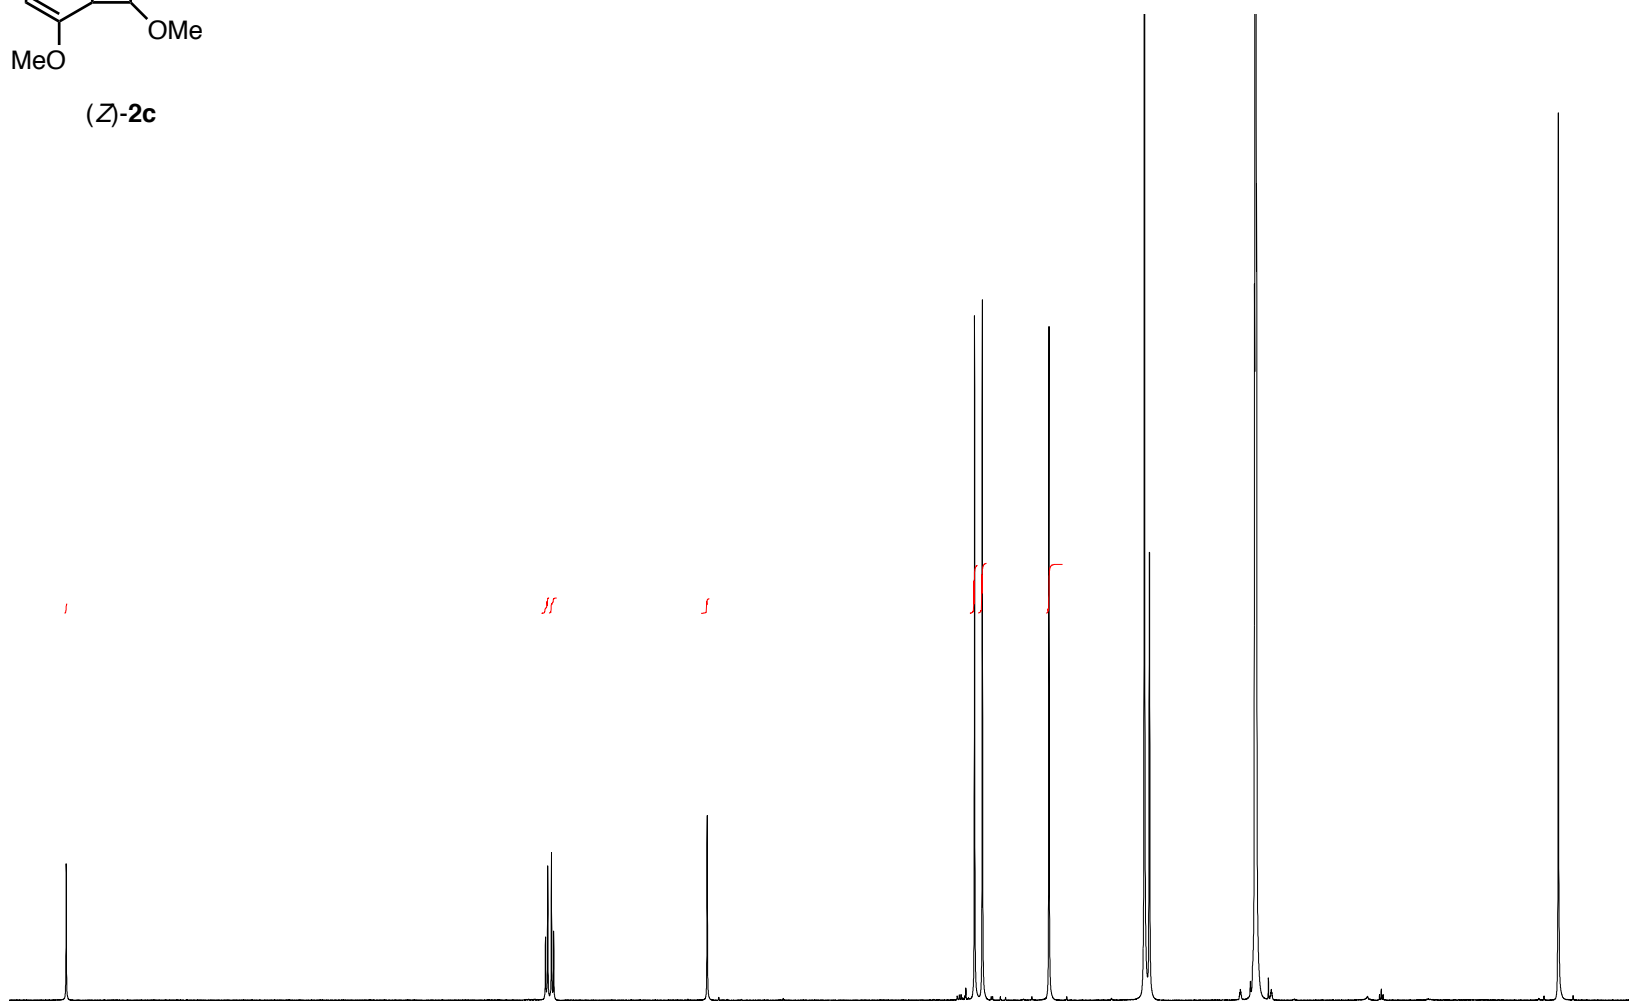

Current Data Parameters  
 NAME rs3-236-1 acetone  
 EXPNO 10  
 PROCNO 1

F2 - Acquisition Parameters  
 Date\_ 20150807  
 Time 21.00  
 INSTRUM spect  
 PROBHD 5 mm CPPBBO BB  
 PULPROG zg30  
 TD 65536  
 SOLVENT Acetone  
 NS 16  
 DS 2  
 SWH 12019.230 Hz  
 FIDRES 0.183399 Hz  
 AQ 2.7262976 sec  
 RG 31.94  
 DW 41.600 use  
 DE 10.00 use  
 TE 300.0 K  
 D1 1.00000000 sec  
 TD0 1

==== CHANNEL f1 =====  
 SF01 600.1337060 MHz  
 NUC1 1H  
 P1 12.00 use  
 PLW1 23.00000000 W

F2 - Processing parameters  
 SI 65536  
 SF 600.1300109 MHz  
 WDW EM  
 SSB 0  
 LB 0.30 Hz  
 GB 0  
 PC 1.00

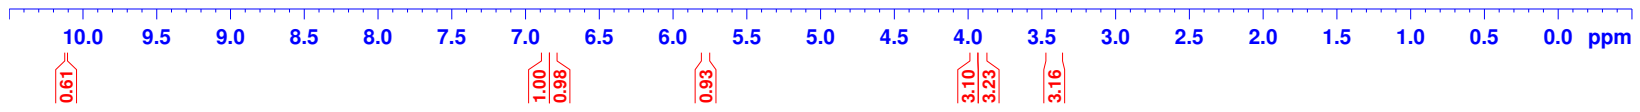

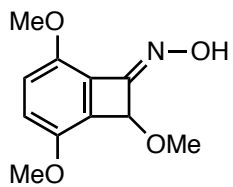

(Z)-2c

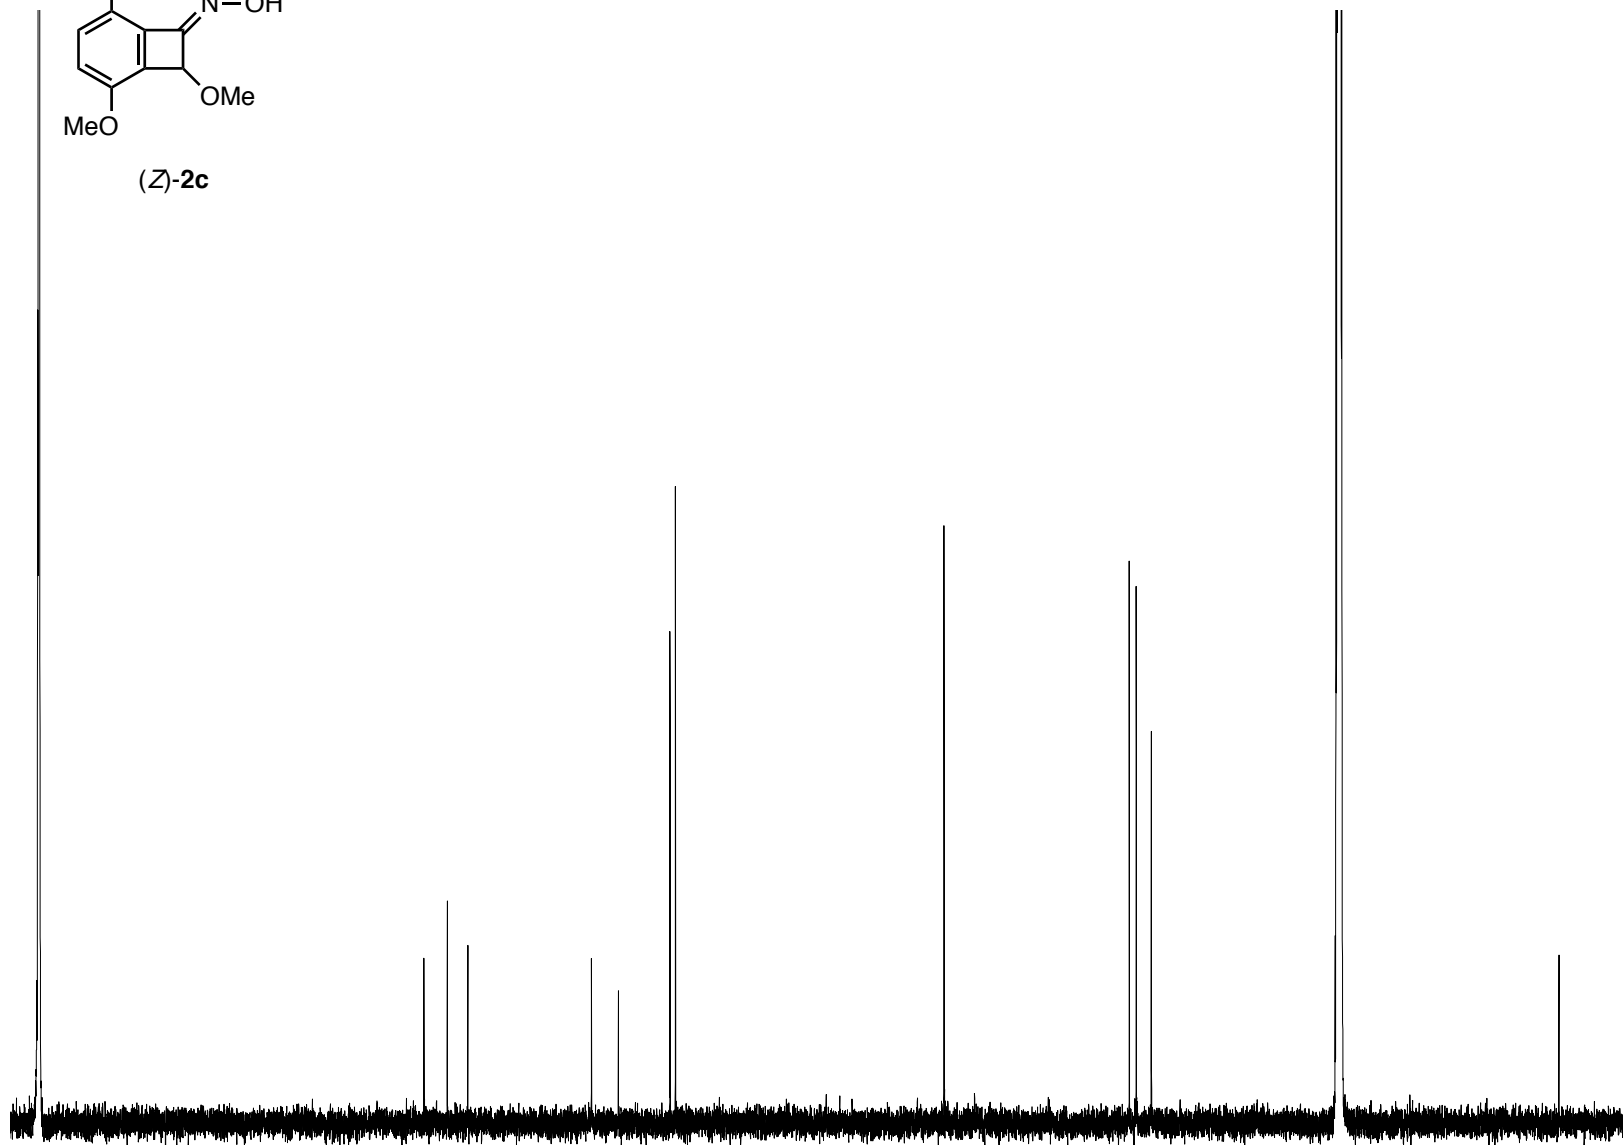

Current Data Parameters  
NAME rs3-238-2  
EXPNO 21  
PROCNO 1

F2 - Acquisition Parameters  
Date\_ 20150905  
Time\_ 22.54  
INSTRUM spect  
PROBHD 5 mm CPPBBO BB  
PULPROG zgpg30  
TD 65536  
SOLVENT Acetone  
NS 1024  
DS 4  
SWH 36057.691 Hz  
FIDRES 0.550197 Hz  
AQ 0.9087659 sec  
RG 175.56  
DW 13.867 use  
DE 18.00 use  
TE 300.0 K  
D1 2.0000000 sec  
D11 0.0300000 sec  
TD0 1

==== CHANNEL f1 =====  
SFO1 150.9178981 MHz  
NUC1 13C  
P1 10.00 use  
PLW1 70.0000000 W

==== CHANNEL f2 =====  
SFO2 600.1324005 MHz  
NUC2 1H  
CPDPRG[2] waltz16  
PCPD2 70.00 use  
PLW2 26.0000000 W  
PLW12 0.76407999 W  
PLW13 0.37439999 W

F2 - Processing parameters  
SI 32768  
SF 150.9026726 MHz  
WDW EM  
SSB 0  
LB 1.00 Hz  
GB 0  
PC 1.40

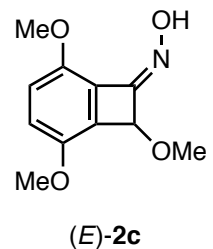

Current Data Parameters  
 NAME rs3-238-3 paradi-E  
 EXPNO 10  
 PROCNO 1

F2 - Acquisition Parameters  
 Date\_ 20161229  
 Time\_ 6.06  
 INSTRUM spect  
 PROBHD 5 mm PABBO BB/  
 PULPROG zg30  
 TD 65536  
 SOLVENT Acetone  
 NS 16  
 DS 2  
 SWH 12019.230 Hz  
 FIDRES 0.183399 Hz  
 AQ 2.7262976 sec  
 RG 99.18  
 DW 41.600 use  
 DE 6.50 use  
 TE 298.0 K  
 D1 1.00000000 sec  
 TD0 1

==== CHANNEL f1 =====  
 SFO1 600.1337060 MHz  
 NUC1 1H  
 P1 12.00 use  
 PLW1 22.00000000 W

F2 - Processing parameters  
 SI 65536  
 SF 600.1300126 MHz  
 WDW EM  
 SSB 0  
 LB 0.30 Hz  
 GB 0  
 PC 1.00

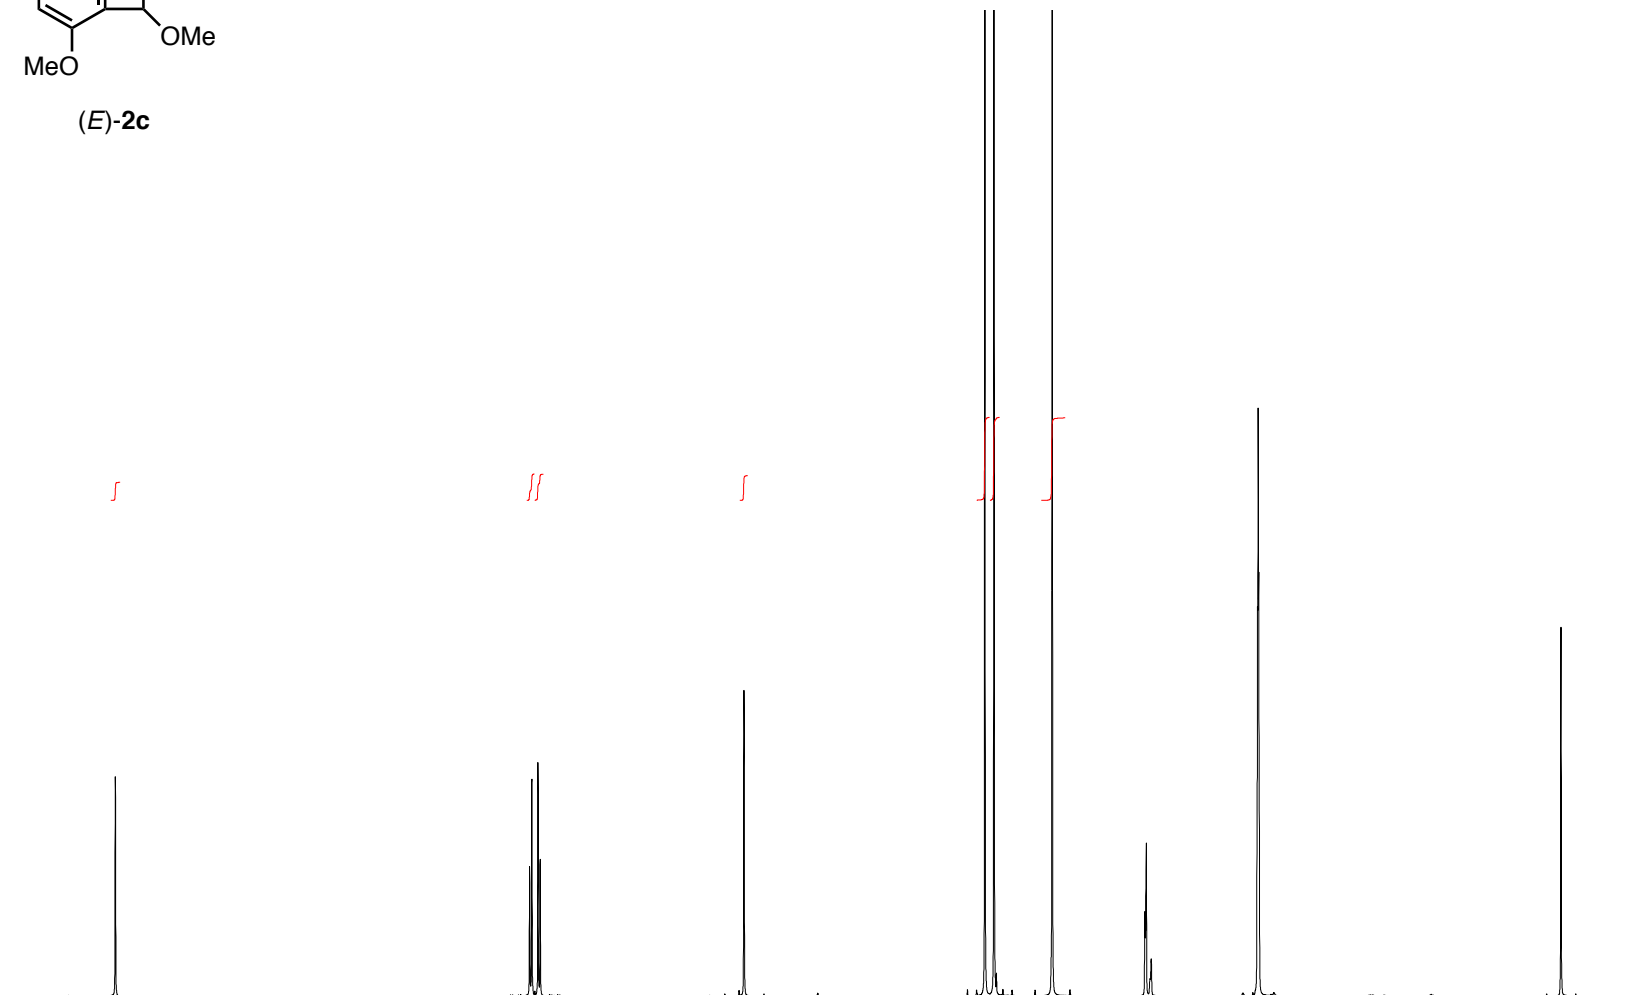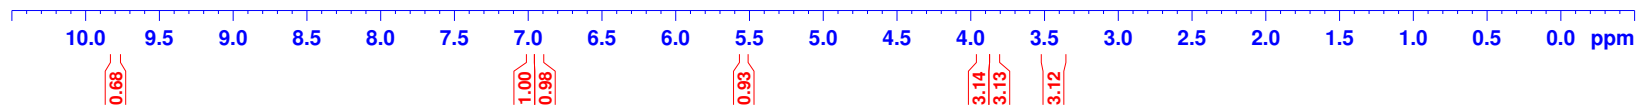

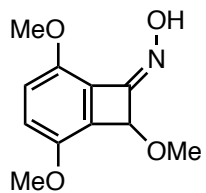

(E)-2c

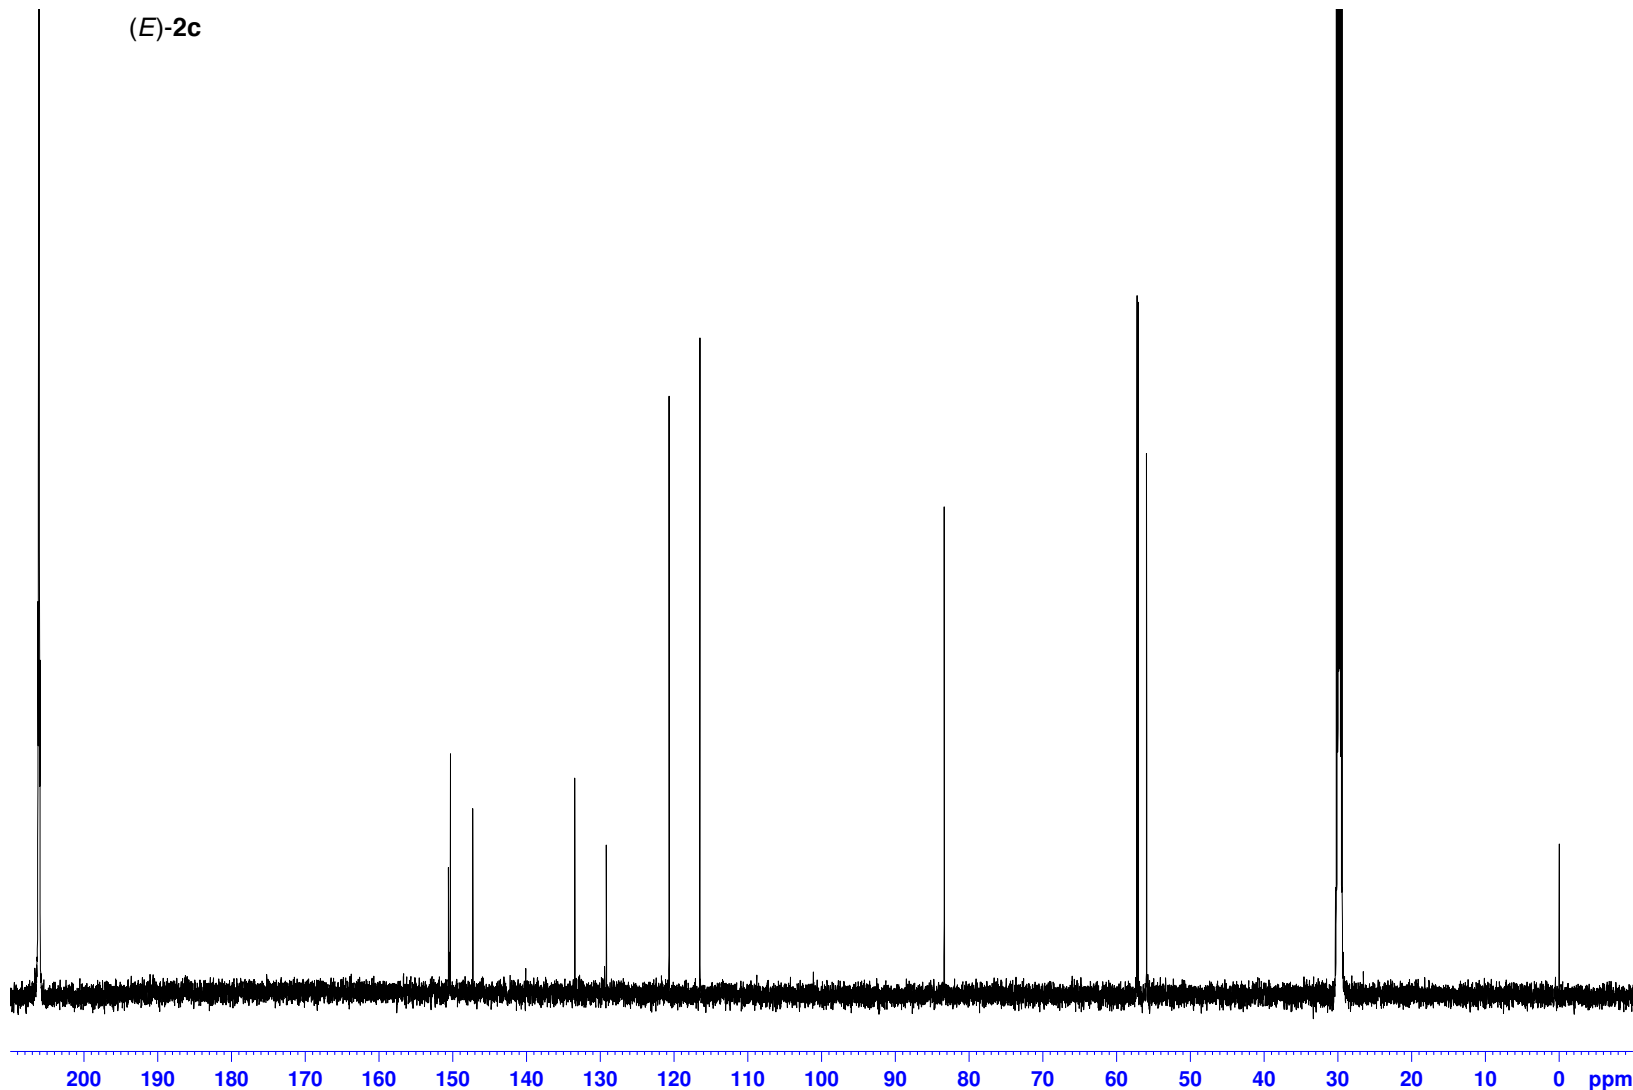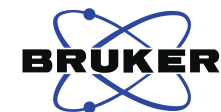

Current Data Parameters  
 NAME rs3-238-3 paradi-E  
 EXPNO 11  
 PROCNO 1

F2 - Acquisition Parameters  
 Date\_ 20161229  
 Time 6.05  
 INSTRUM spect  
 PROBHD 5 mm PABBO BB/  
 PULPROG zgpg30  
 TD 65536  
 SOLVENT Acetone  
 NS 3072  
 DS 4  
 SWH 36057.691 Hz  
 FIDRES 0.550197 Hz  
 AQ 0.9087659 sec  
 RG 175.56  
 DW 13.867 use  
 DE 6.50 use  
 TE 298.0 K  
 D1 2.00000000 sec  
 D11 0.03000000 sec  
 TD0 1

===== CHANNEL f1 =====  
 SFO1 150.9178981 MHz  
 NUC1 13C  
 P1 11.00 use  
 PLW1 93.00000000 W

===== CHANNEL f2 =====  
 SFO2 600.1324005 MHz  
 NUC2 1H  
 CPDPRG[2] waltz16  
 PCPD2 70.00 use  
 PLW2 22.00000000 W  
 PLW12 0.64652997 W  
 PLW13 0.31680000 W

F2 - Processing parameters  
 SI 32768  
 SF 150.9026726 MHz  
 WDW EM  
 SSB 0  
 LB 1.00 Hz  
 GB 0  
 PC 1.40



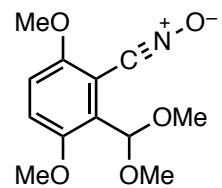

3c

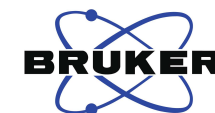

Current Data Parameters  
 NAME paradimethoxy nito  
 EXPNO 20  
 PROCNO 1

F2 - Acquisition Parameters  
 Date\_ 20170220  
 Time\_ 17.32  
 INSTRUM spect  
 PROBHD 5 mm PABBO BB/  
 PULPROG zg30  
 TD 65536  
 SOLVENT CDC13  
 NS 16  
 DS 2  
 SWH 12019.230 Hz  
 FIDRES 0.183399 Hz  
 AQ 2.7262976 sec  
 RG 75.66  
 DW 41.600 use  
 DE 6.50 use  
 TE 298.0 K  
 D1 1.0000000 sec  
 TD0 1

==== CHANNEL f1 =====  
 SFO1 600.1337060 MHz  
 NUC1 1H  
 P1 12.00 use  
 PLW1 22.0000000 W

F2 - Processing parameters  
 SI 65536  
 SF 600.1300145 MHz  
 WDW EM  
 SSB 0  
 LB 0.30 Hz  
 GB 0  
 PC 1.00

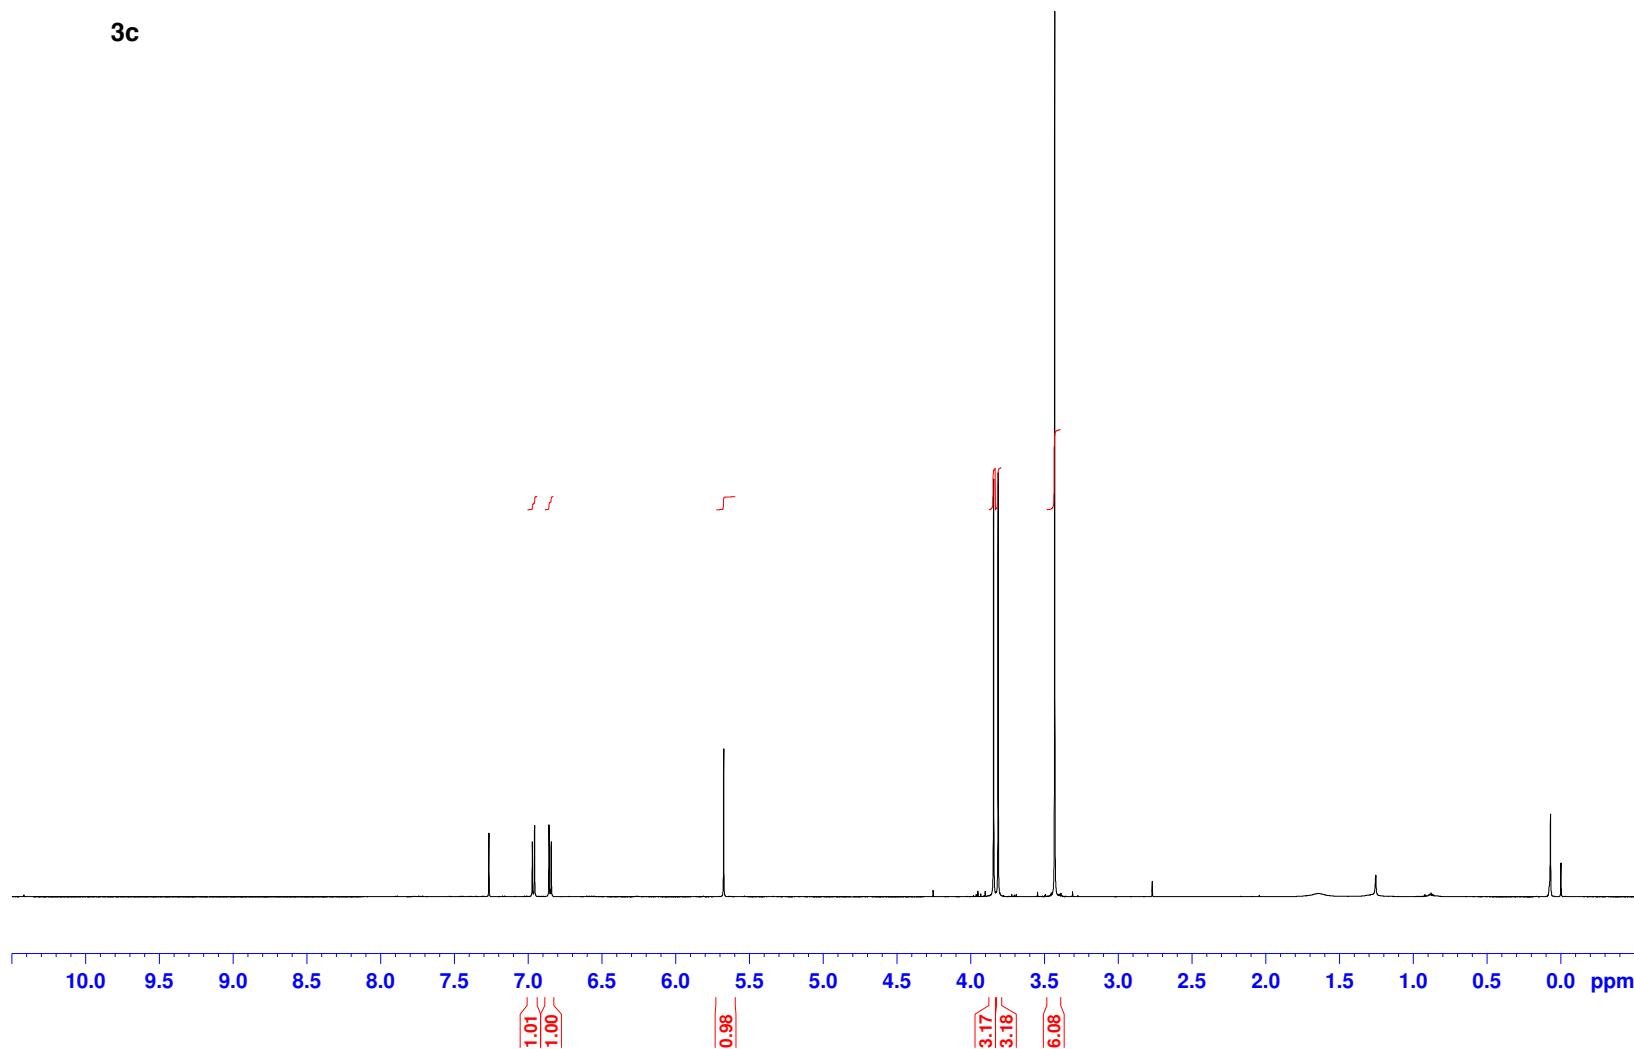

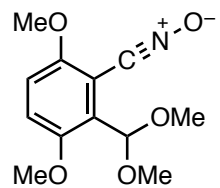

3c

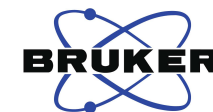

Current Data Parameters  
 NAME paradimethoxy nito  
 EXPNO 21  
 PROCNO 1

F2 - Acquisition Parameters  
 Date\_ 20170221  
 Time\_ 5.00  
 INSTRUM spect  
 PROBHD 5 mm PABBO BB/  
 PULPROG zgpg30  
 TD 65536  
 SOLVENT CDCl3  
 NS 6000  
 DS 4  
 SWH 36057.691 Hz  
 FIDRES 0.550197 Hz  
 AQ 0.9087659 sec  
 RG 175.56  
 DW 13.867 use  
 DE 6.50 use  
 TE 298.0 K  
 D1 2.0000000 sec  
 D11 0.0300000 sec  
 TD0 1

==== CHANNEL f1 =====  
 SFO1 150.9178981 MHz  
 NUC1 13C  
 P1 11.00 use  
 PLW1 93.0000000 W

==== CHANNEL f2 =====  
 SFO2 600.1324005 MHz  
 NUC2 1H  
 CPDPRG[2] waltz16  
 PCPD2 70.00 use  
 PLW2 22.0000000 W  
 PLW12 0.64652997 W  
 PLW13 0.31680000 W

F2 - Processing parameters  
 SI 32768  
 SF 150.9029630 MHz  
 WDW EM  
 SSB 0  
 LB 1.00 Hz  
 GB 0  
 PC 1.40

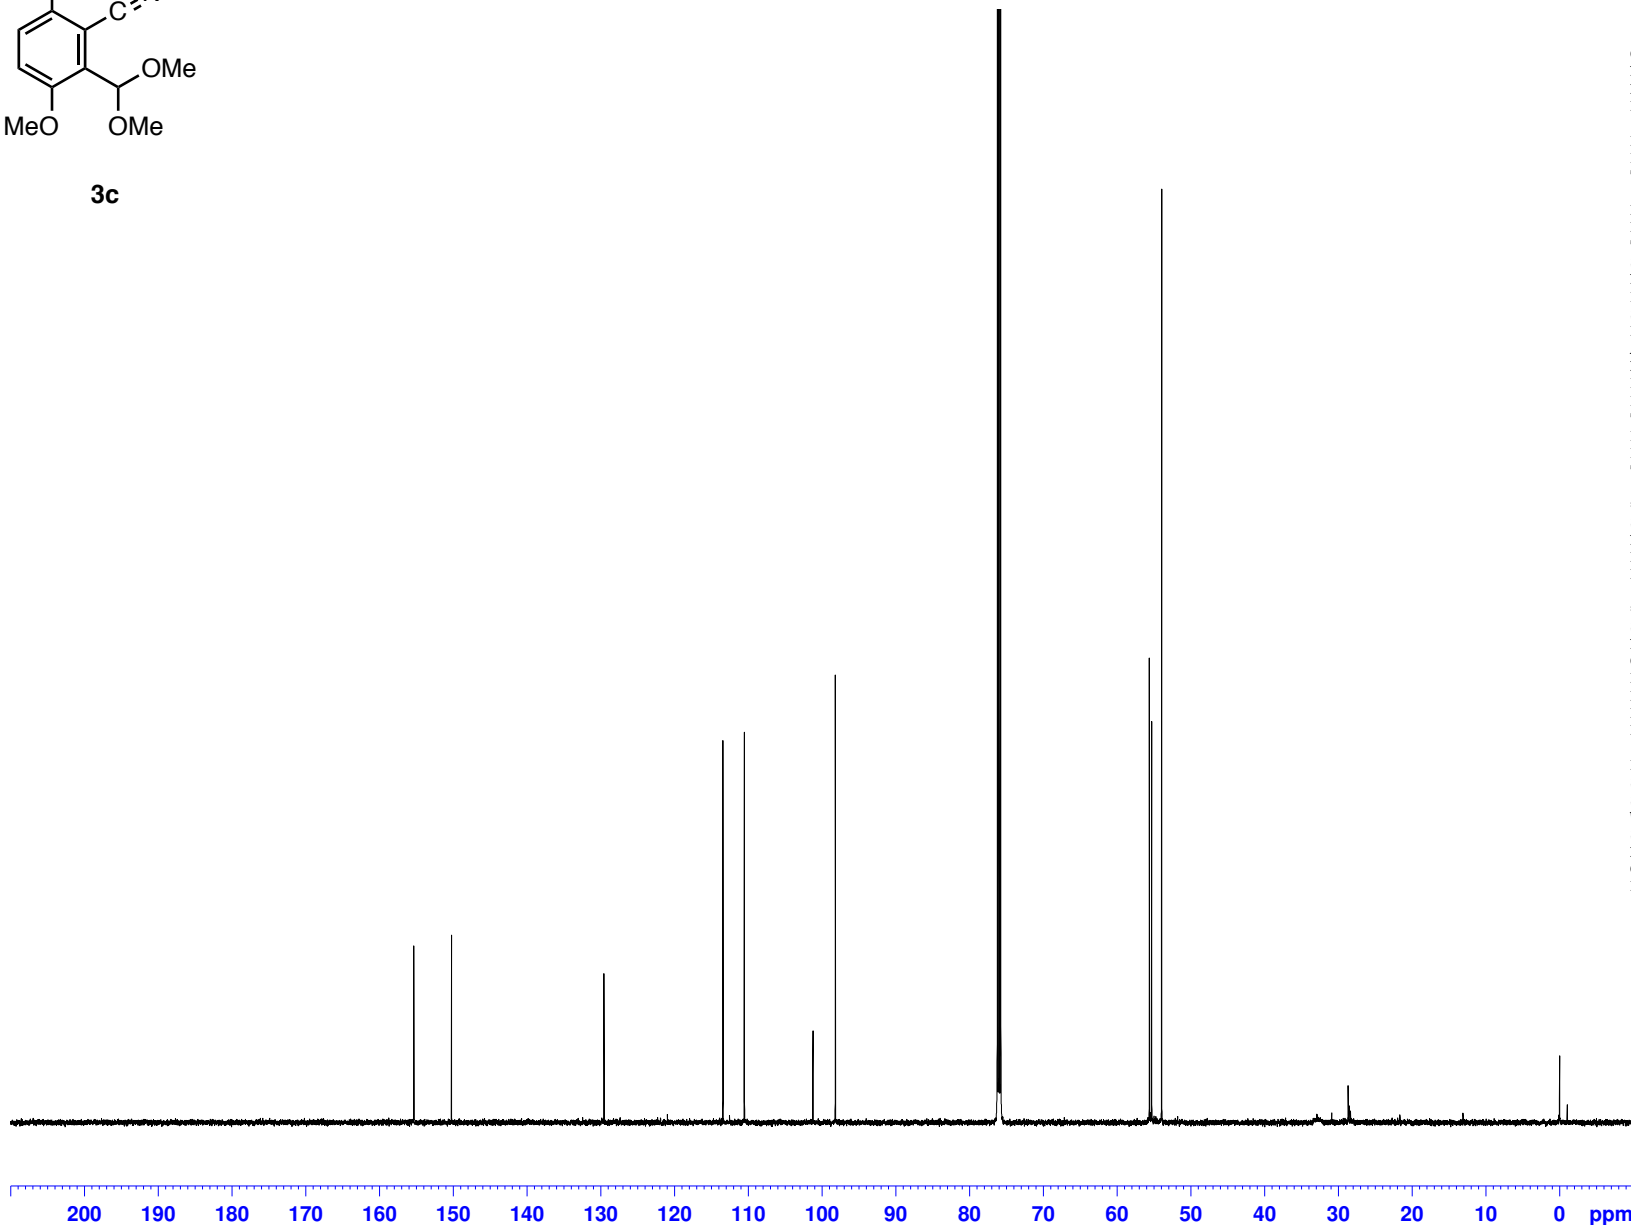

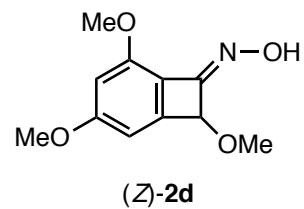

Current Data Parameters  
 NAME rs3-166-1  
 EXPNO 20  
 PROCNO 1

F2 - Acquisition Parameters  
 Date\_ 20150421  
 Time\_ 17.10  
 INSTRUM spect  
 PROBHD 5 mm CPPBBO BB  
 PULPROG zg30  
 TD 65536  
 SOLVENT Acetone  
 NS 16  
 DS 2  
 SWH 12019.230 Hz  
 FIDRES 0.183399 Hz  
 AQ 2.7262976 sec  
 RG 31.94  
 DW 41.600 use  
 DE 10.00 use  
 TE 300.0 K  
 D1 1.00000000 sec  
 TD0 1

===== CHANNEL f1 =====  
 SFO1 600.1337060 MHz  
 NUC1 1H  
 P1 12.00 use  
 PLW1 23.00000000 W

F2 - Processing parameters  
 SI 65536  
 SF 600.1300110 MHz  
 WDW EM  
 SSB 0  
 LB 0.30 Hz  
 GB 0  
 PC 1.00

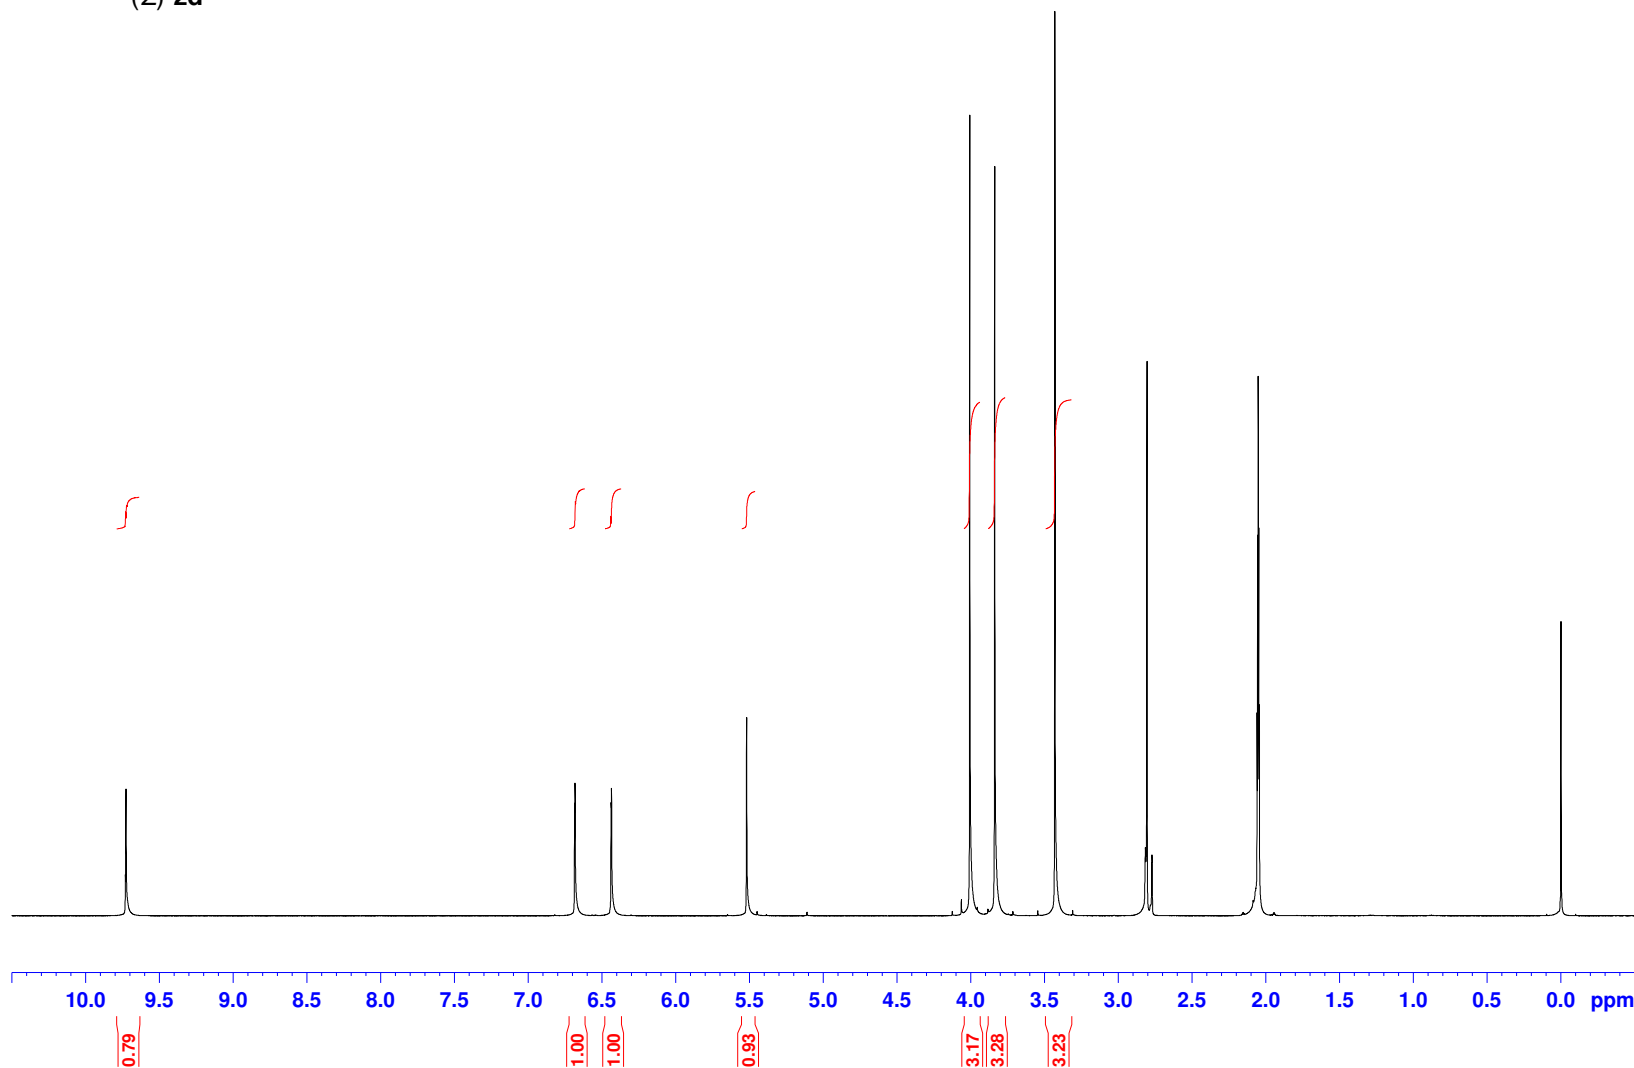

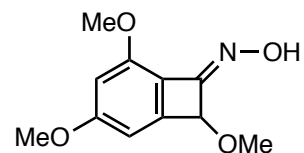

(Z)-2d

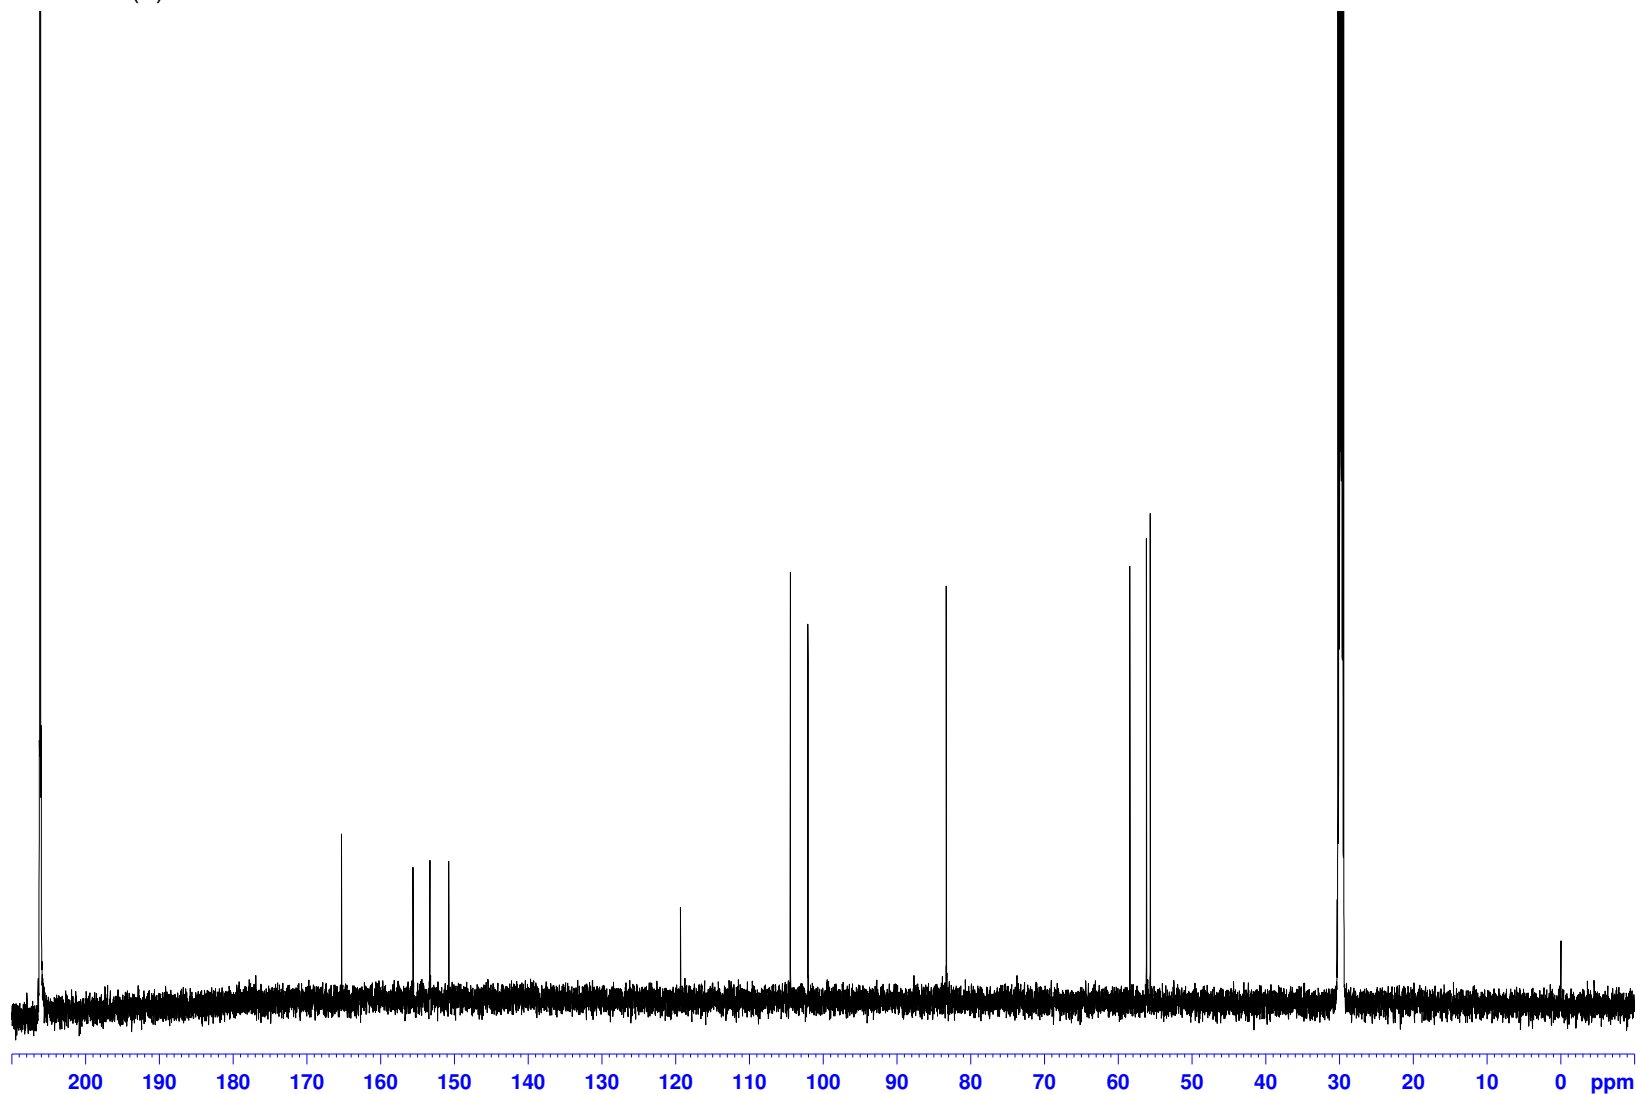

Current Data Parameters  
 NAME rs3-166-1  
 EXPNO 21  
 PROCNO 1

F2 - Acquisition Parameters  
 Date\_ 20150421  
 Time\_ 17.18  
 INSTRUM spect  
 PROBHD 5 mm CPPBBO BB  
 PULPROG zgpg30  
 TD 65536  
 SOLVENT Acetone  
 NS 128  
 DS 4  
 SWH 36057.691 Hz  
 FIDRES 0.550197 Hz  
 AQ 0.9087659 sec  
 RG 175.56  
 DW 13.867 use  
 DE 18.00 use  
 TE 300.0 K  
 D1 2.0000000 sec  
 D11 0.0300000 sec  
 TD0 1

==== CHANNEL f1 =====  
 SFO1 150.9178981 MHz  
 NUC1 13C  
 P1 10.00 use  
 PLW1 70.0000000 W

==== CHANNEL f2 =====  
 SFO2 600.1324005 MHz  
 NUC2 1H  
 CPDPRG[2] waltz16  
 PCPD2 70.00 use  
 PLW2 26.0000000 W  
 PLW12 0.76407999 W  
 PLW13 0.37439999 W

F2 - Processing parameters  
 SI 32768  
 SF 150.9026714 MHz  
 WDW EM  
 SSB 0  
 LB 1.00 Hz  
 GB 0  
 PC 1.40

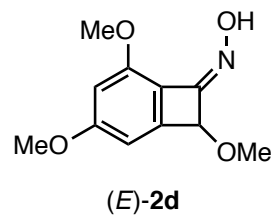

Current Data Parameters  
 NAME rs3-166-2  
 EXPNO 11  
 PROCNO 1

F2 - Acquisition Parameters  
 Date\_ 20150414  
 Time\_ 20.59  
 INSTRUM spect  
 PROBHD 5 mm CPPBBO BB  
 PULPROG zg30  
 TD 65536  
 SOLVENT Acetone  
 NS 16  
 DS 2  
 SWH 12019.230 Hz  
 FIDRES 0.183399 Hz  
 AQ 2.7262976 sec  
 RG 31.94  
 DW 41.600 use  
 DE 10.00 use  
 TE 300.0 K  
 D1 1.00000000 sec  
 TD0 1

==== CHANNEL f1 =====  
 SFO1 600.1337060 MHz  
 NUC1 1H  
 P1 12.00 use  
 PLW1 23.00000000 W

F2 - Processing parameters  
 SI 65536  
 SF 600.1300110 MHz  
 WDW EM  
 SSB 0  
 LB 0.30 Hz  
 GB 0  
 PC 1.00

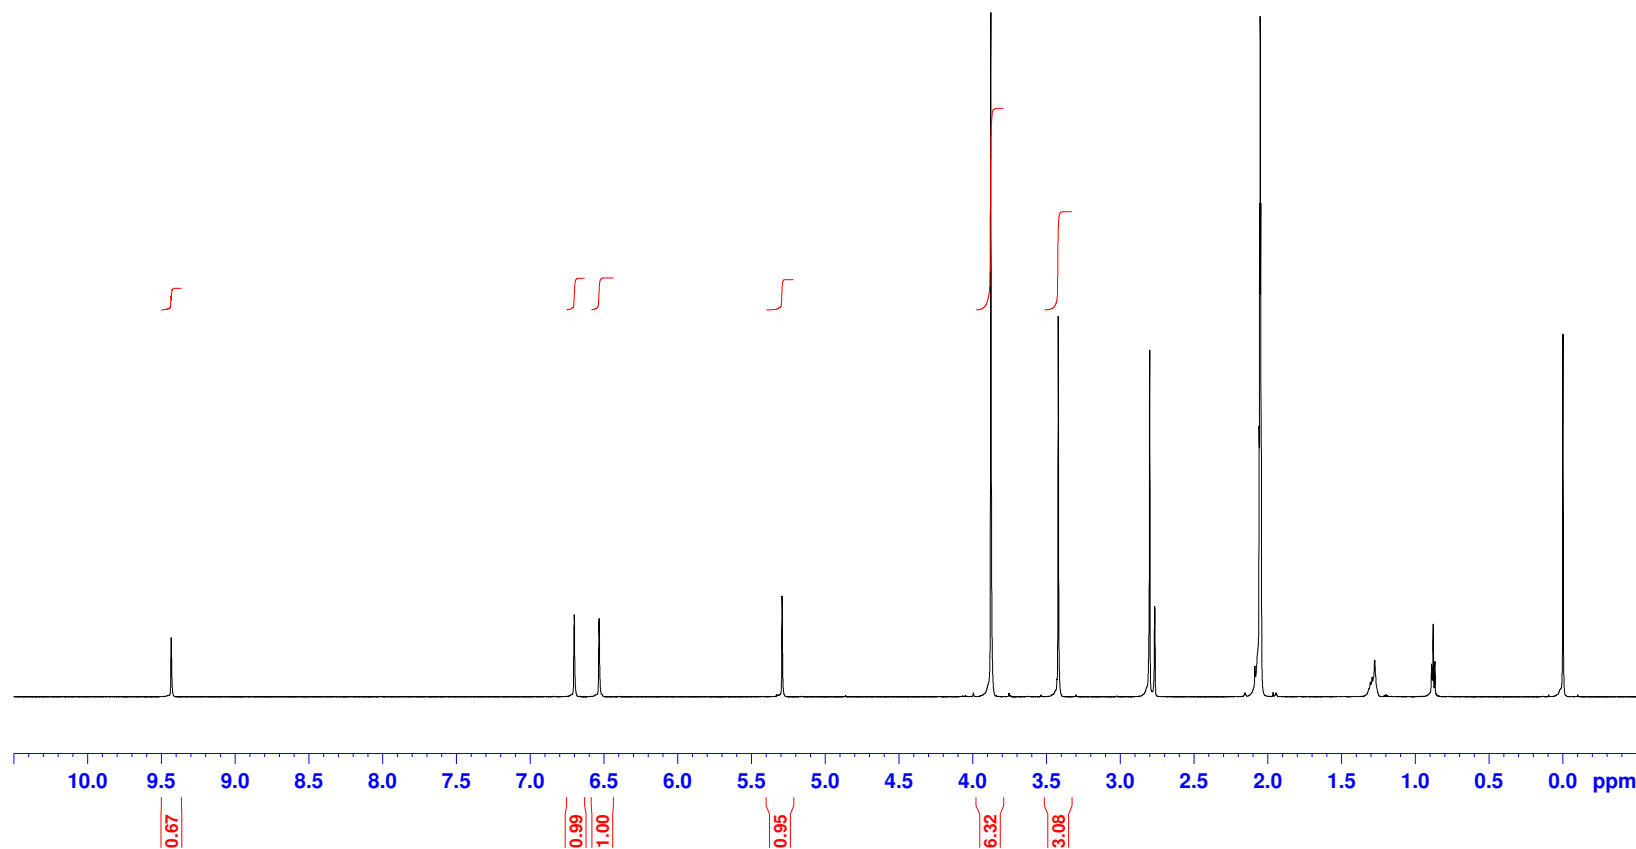

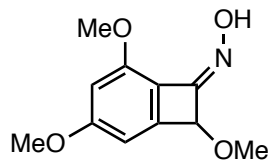

(E)-2d

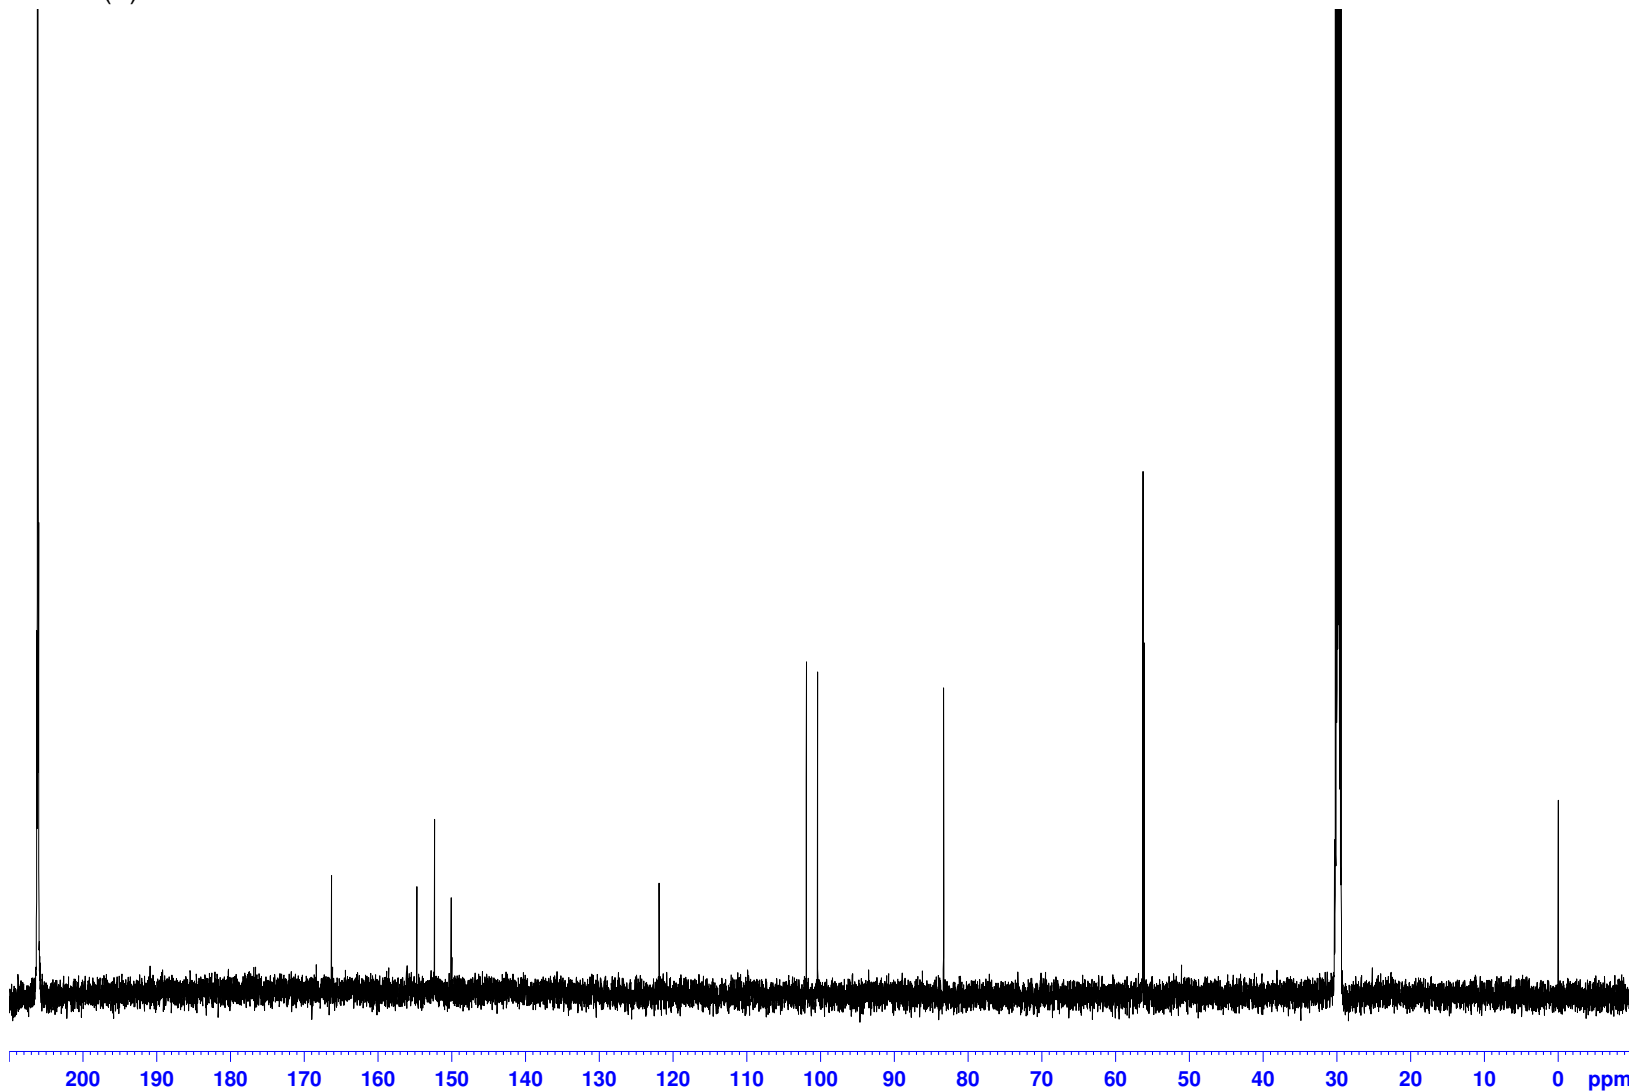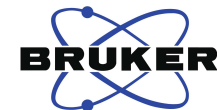

Current Data Parameters  
 NAME rs3-166-2 dimethox  
 EXPNO 21  
 PROCNO 1

F2 - Acquisition Parameters  
 Date\_ 20161227  
 Time 3.44  
 INSTRUM spect  
 PROBHD 5 mm PABBO BB/  
 PULPROG zgpg30  
 TD 65536  
 SOLVENT Acetone  
 NS 2048  
 DS 4  
 SWH 36057.691 Hz  
 FIDRES 0.550197 Hz  
 AQ 0.9087659 sec  
 RG 175.56  
 DW 13.867 use  
 DE 6.50 use  
 TE 298.0 K  
 D1 2.0000000 sec  
 D11 0.0300000 sec  
 TD0 1

==== CHANNEL f1 =====  
 SFO1 150.9178981 MHz  
 NUC1 13C  
 P1 11.00 use  
 PLW1 93.0000000 W

==== CHANNEL f2 =====  
 SFO2 600.1324005 MHz  
 NUC2 1H  
 CPDPRG[2] waltz16  
 PCPD2 70.00 use  
 PLW2 22.0000000 W  
 PLW12 0.64652997 W  
 PLW13 0.31680000 W

F2 - Processing parameters  
 SI 32768  
 SF 150.9026725 MHz  
 WDW EM  
 SSB 0  
 LB 1.00 Hz  
 GB 0  
 PC 1.40

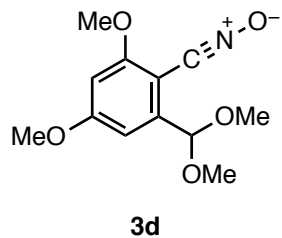

Current Data Parameters  
 NAME rs3-170-1  
 EXPNO 10  
 PROCNO 1

F2 - Acquisition Parameters  
 Date\_ 20150430  
 Time\_ 23.15  
 INSTRUM spect  
 PROBHD 5 mm CPPBBO BB  
 PULPROG zg30  
 TD 65536  
 SOLVENT CDC13  
 NS 16  
 DS 2  
 SWH 12019.230 Hz  
 FIDRES 0.183399 Hz  
 AQ 2.7262976 sec  
 RG 17.5  
 DW 41.600 use  
 DE 10.00 use  
 TE 300.0 K  
 D1 1.00000000 sec  
 TD0 1

==== CHANNEL f1 =====  
 SFO1 600.1337060 MHz  
 NUC1 1H  
 P1 12.00 use  
 PLW1 23.00000000 W

F2 - Processing parameters  
 SI 65536  
 SF 600.1300089 MHz  
 WDW EM  
 SSB 0  
 LB 0.30 Hz  
 GB 0  
 PC 1.00

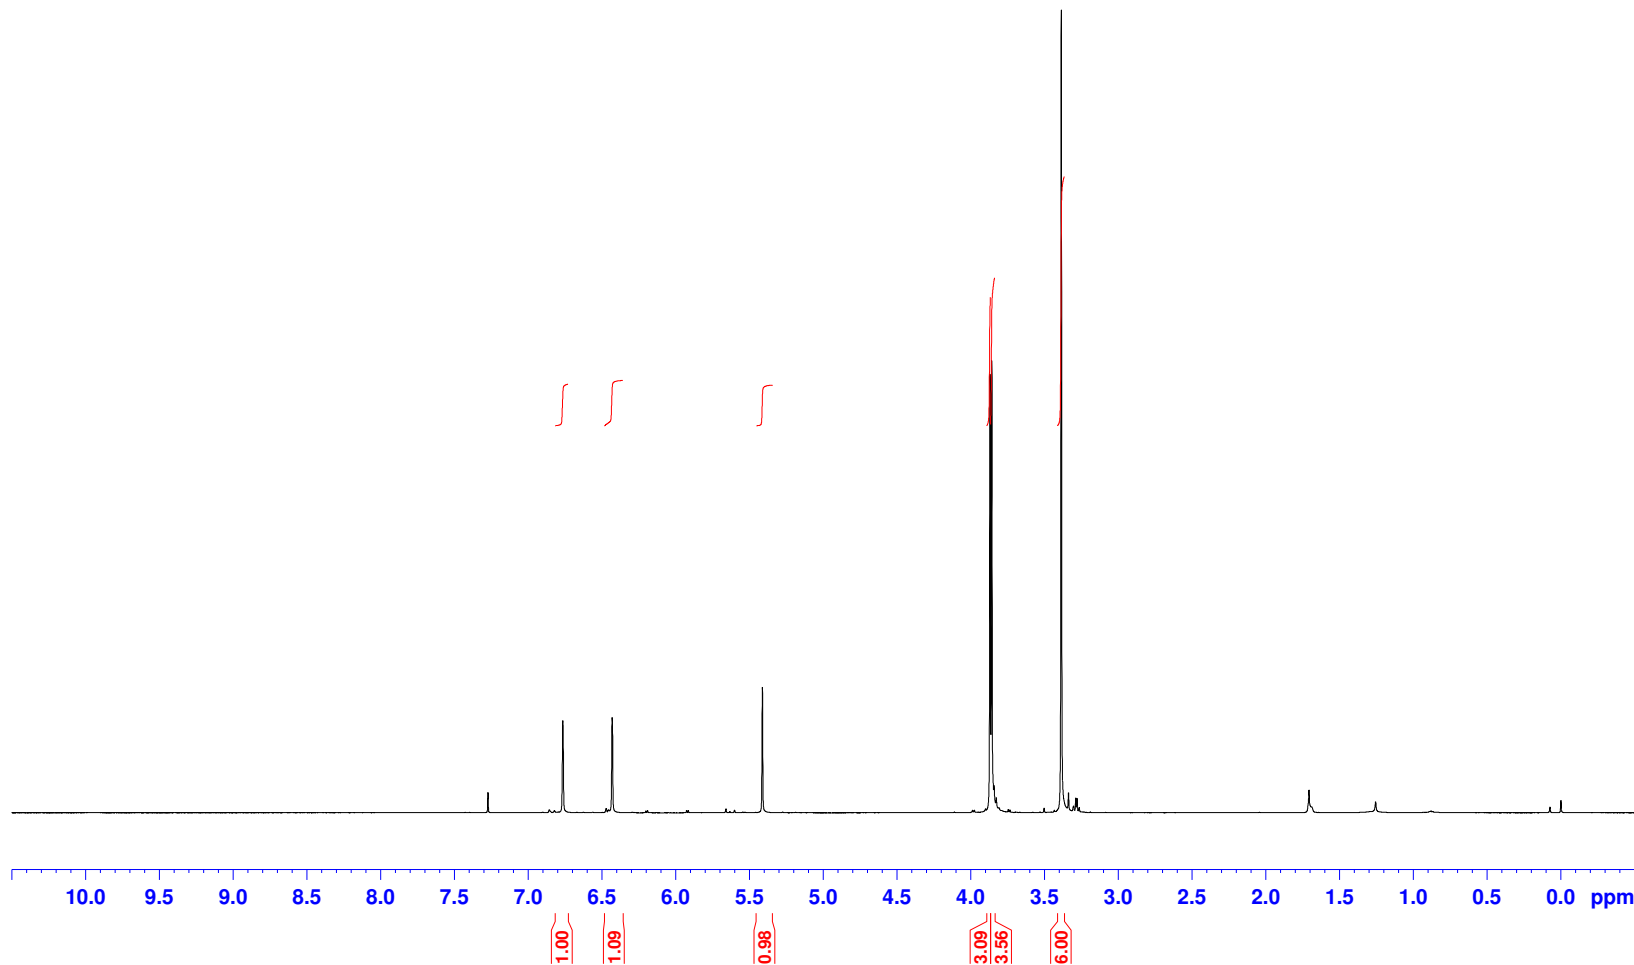

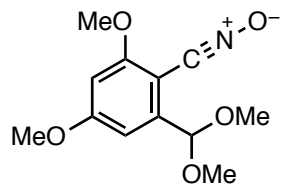

3d



Current Data Parameters  
 NAME rs3-170-1  
 EXPNO 21  
 PROCNO 1

F2 - Acquisition Parameters  
 Date\_ 20150516  
 Time\_ 19.39  
 INSTRUM spect  
 PROBHD 5 mm CPPBBO BB  
 PULPROG zgpg30  
 TD 65536  
 SOLVENT CDC13  
 NS 128  
 DS 4  
 SWH 36057.691 Hz  
 FIDRES 0.550197 Hz  
 AQ 0.9087659 sec  
 RG 175.56  
 DW 13.867 use  
 DE 18.00 use  
 TE 300.0 K  
 D1 2.00000000 sec  
 D11 0.03000000 sec  
 TD0 1

==== CHANNEL f1 =====  
 SFO1 150.9178981 MHz  
 NUC1 13C  
 P1 10.00 use  
 PLW1 70.00000000 W

==== CHANNEL f2 =====  
 SFO2 600.1324005 MHz  
 NUC2 1H  
 CPDPRG[2] waltz16  
 PCPD2 70.00 use  
 PLW2 26.00000000 W  
 PLW12 0.76407999 W  
 PLW13 0.37439999 W

F2 - Processing parameters  
 SI 32768  
 SF 150.9028056 MHz  
 WDW EM  
 SSB 0  
 LB 1.00 Hz  
 GB 0  
 PC 1.40

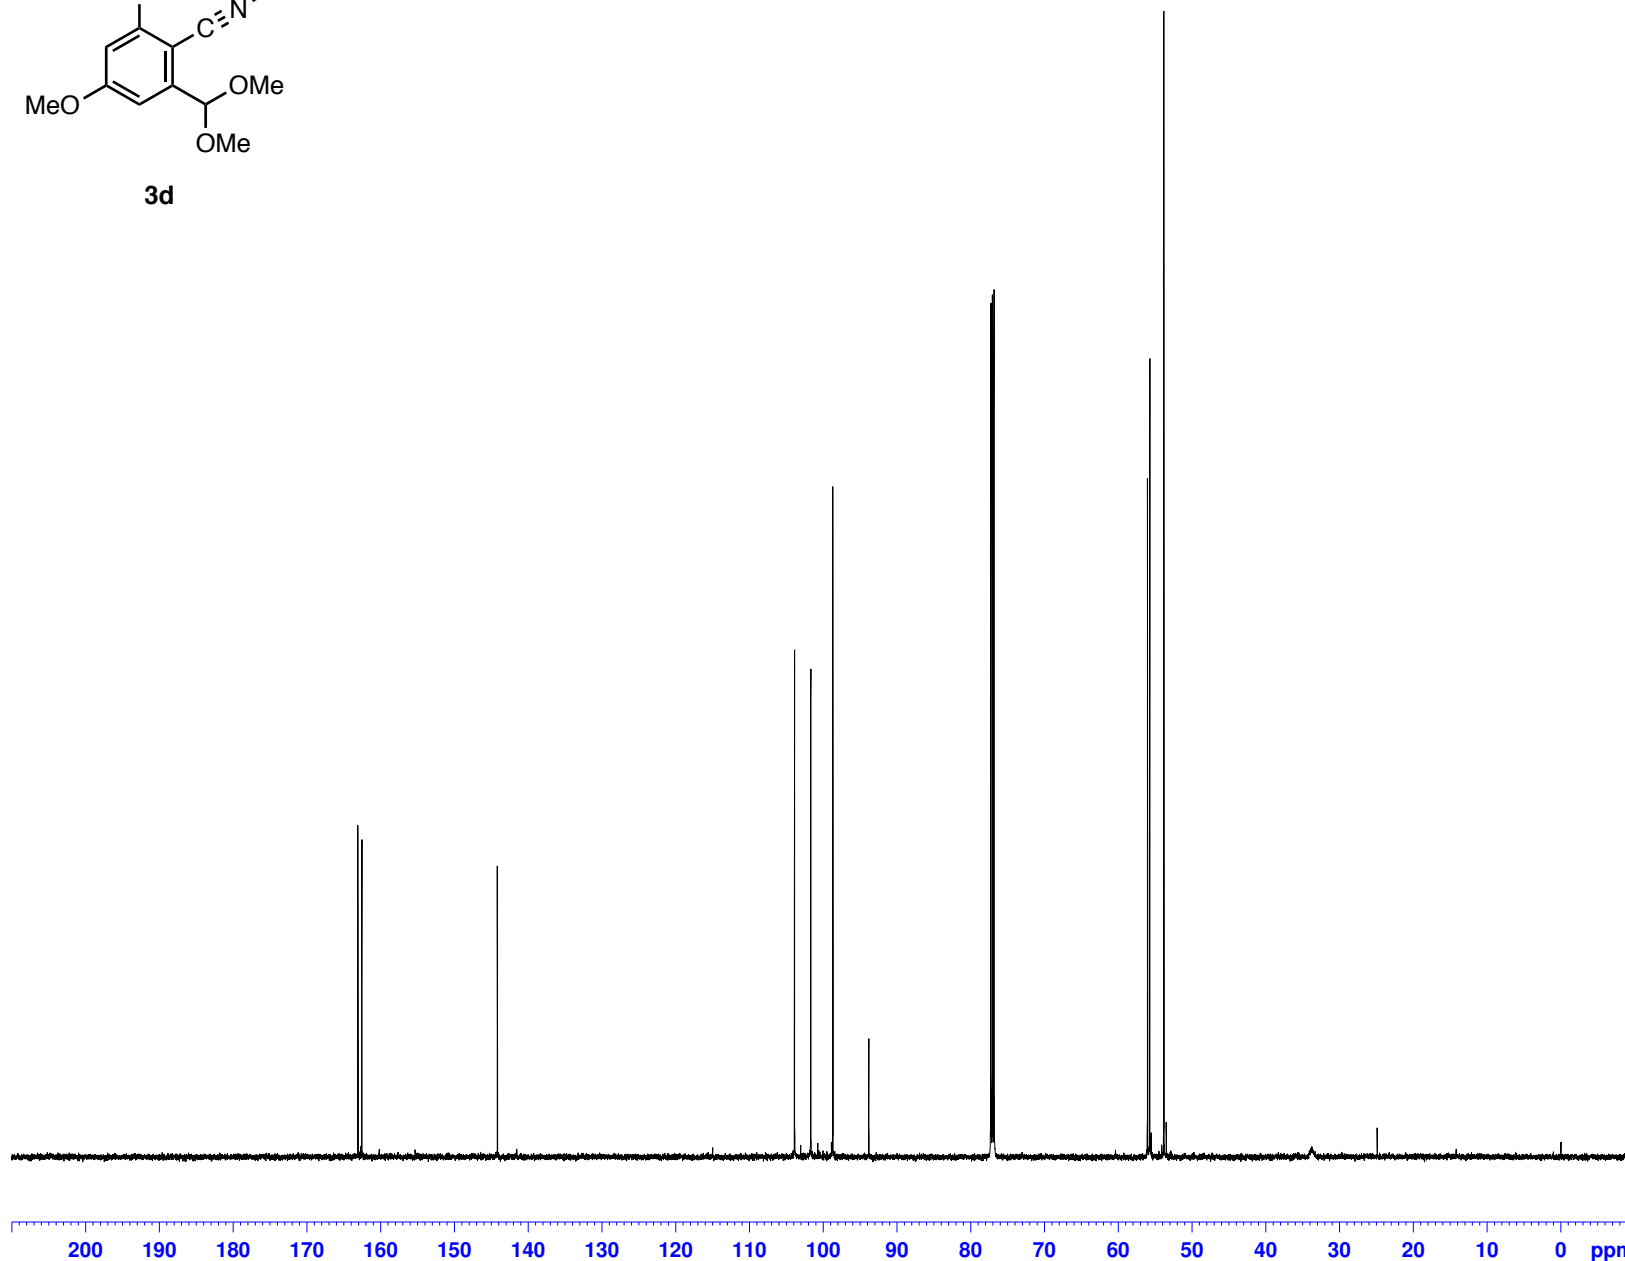



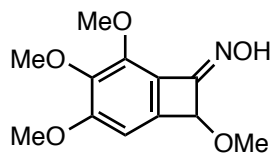

2e



Current Data Parameters  
 NAME rs3-108-1  
 EXPNO 20  
 PROCNO 1

F2 - Acquisition Parameters  
 Date\_ 20150411  
 Time\_ 0.10  
 INSTRUM spect  
 PROBHD 5 mm CPPBBO BB  
 PULPROG zg30  
 TD 65536  
 SOLVENT Acetone  
 NS 16  
 DS 2  
 SWH 12019.230 Hz  
 FIDRES 0.183399 Hz  
 AQ 2.7262976 sec  
 RG 31.94  
 DW 41.600 use  
 DE 10.00 use  
 TE 300.0 K  
 D1 1.0000000 sec  
 TD0 1

==== CHANNEL f1 =====  
 SFO1 600.1337060 MHz  
 NUC1 1H  
 P1 12.00 use  
 PLW1 23.0000000 W

F2 - Processing parameters  
 SI 65536  
 SF 600.1300109 MHz  
 WDW EM  
 SSB 0  
 LB 0.30 Hz  
 GB 0  
 PC 1.00

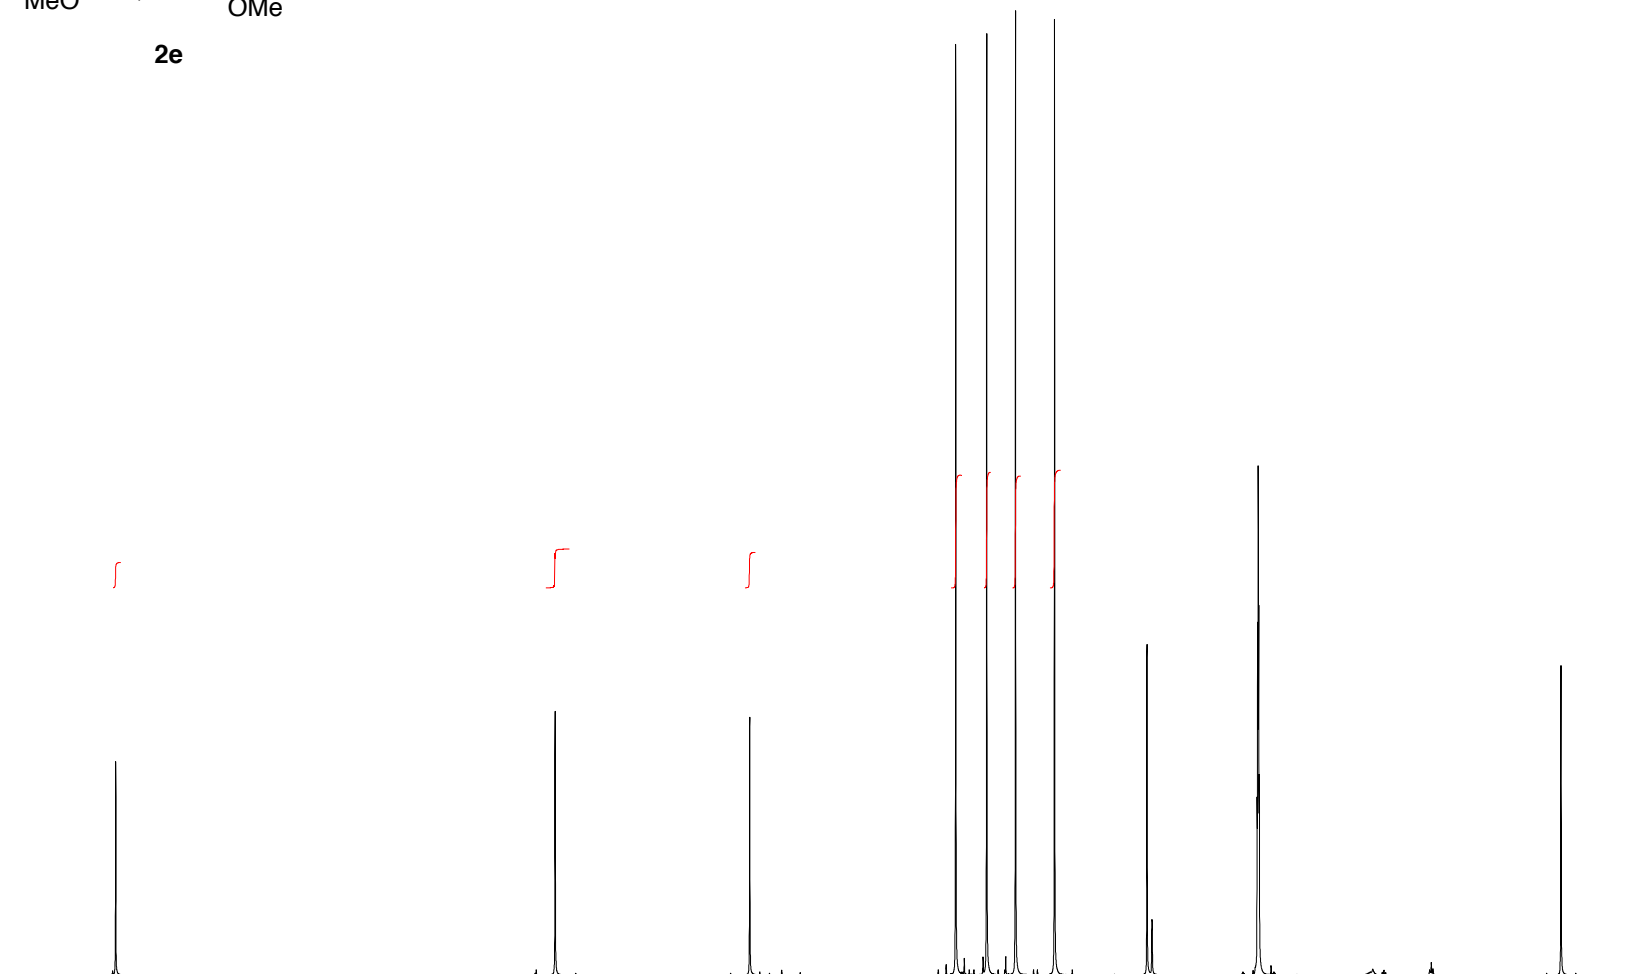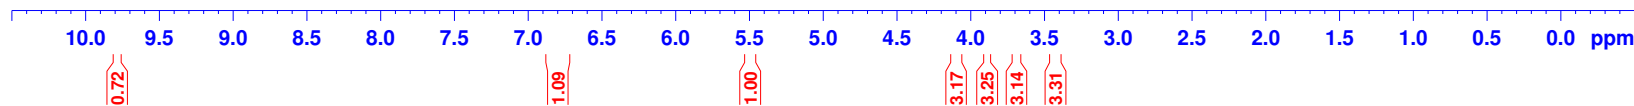



2e

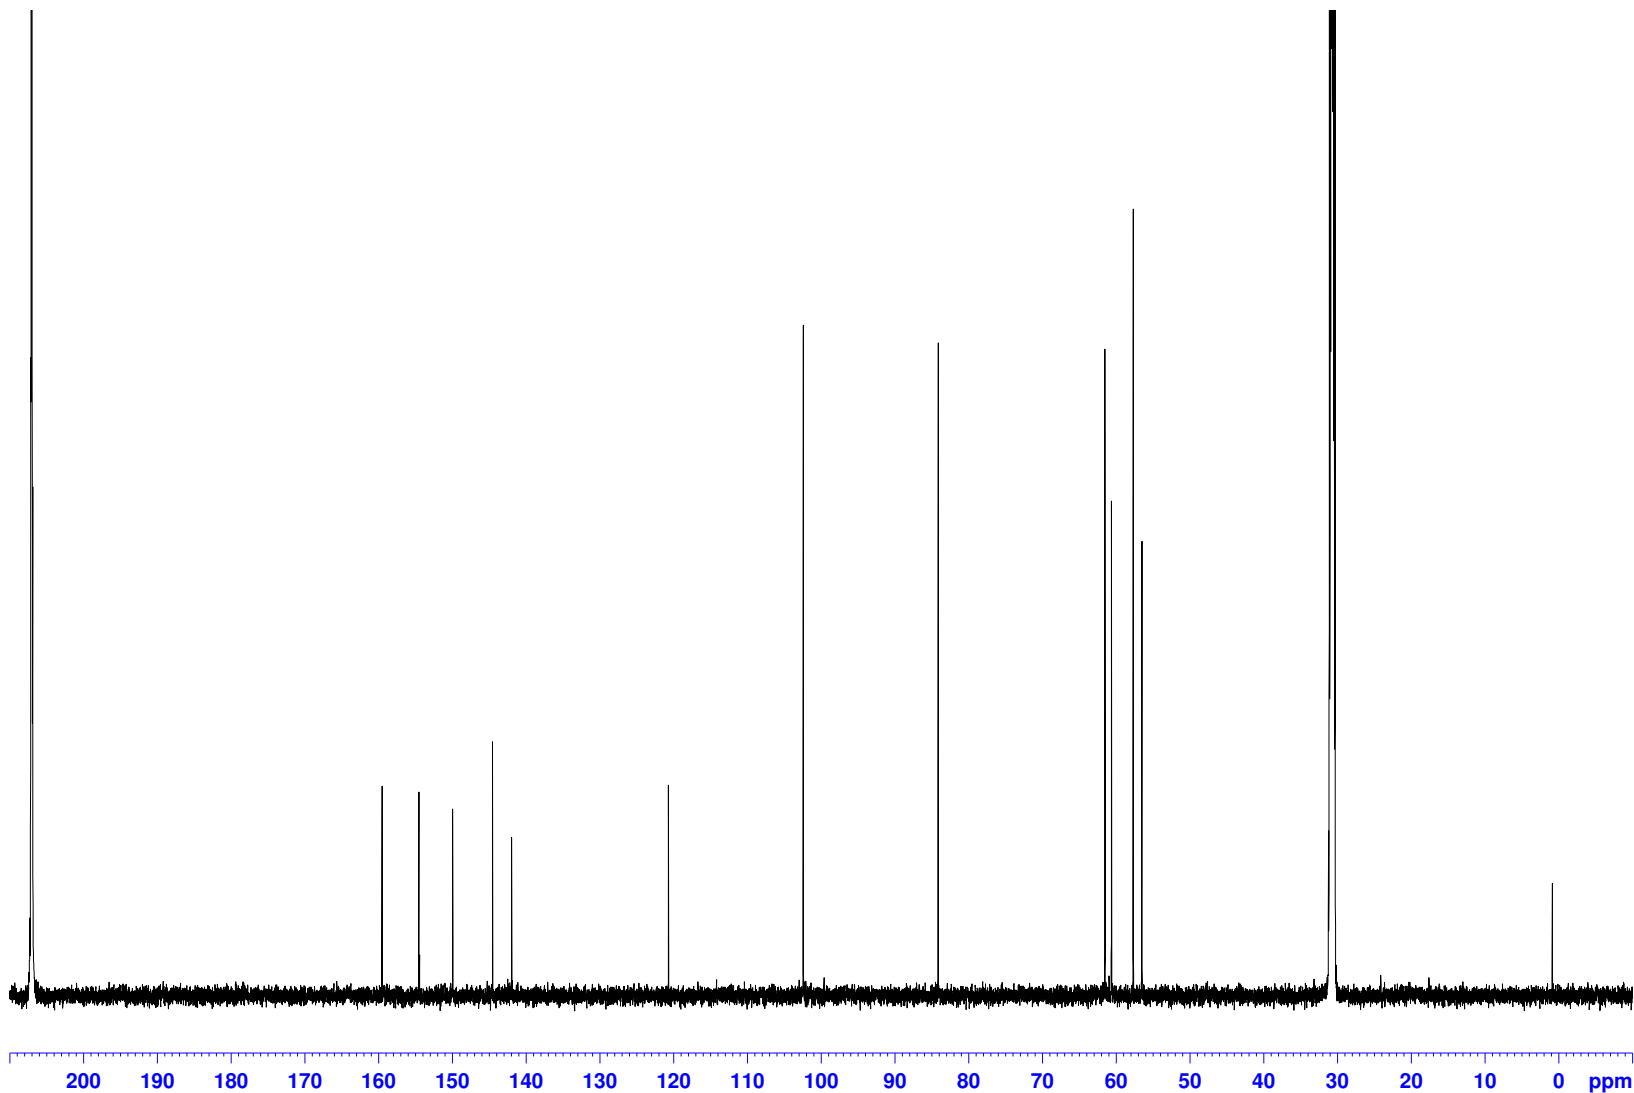

Current Data Parameters  
 NAME rs3-108-1  
 EXPNO 21  
 PROCNO 1

F2 - Acquisition Parameters  
 Date\_ 20150411  
 Time\_ 7.53  
 INSTRUM spect  
 PROBHD 5 mm CPPBBO BB  
 PULPROG zgpg30  
 TD 65536  
 SOLVENT Acetone  
 NS 1024  
 DS 4  
 SWH 36057.691 Hz  
 FIDRES 0.550197 Hz  
 AQ 0.9087659 sec  
 RG 175.56  
 DW 13.867 use  
 DE 18.00 use  
 TE 300.0 K  
 D1 2.0000000 sec  
 D11 0.0300000 sec  
 TD0 1

==== CHANNEL f1 =====  
 SFO1 150.9178981 MHz  
 NUC1 13C  
 P1 10.00 use  
 PLW1 70.0000000 W

==== CHANNEL f2 =====  
 SFO2 600.1324005 MHz  
 NUC2 1H  
 CPDPRG[2] waltz16  
 PCPD2 70.00 use  
 PLW2 26.0000000 W  
 PLW12 0.76407999 W  
 PLW13 0.37439999 W

F2 - Processing parameters  
 SI 32768  
 SF 150.9025361 MHz  
 WDW EM  
 SSB 0  
 LB 1.00 Hz  
 GB 0  
 PC 1.40

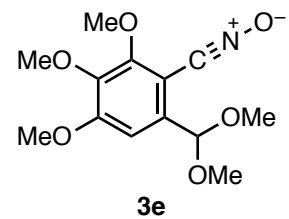

Current Data Parameters  
 NAME tri  
 EXPNO 10  
 PROCNO 1

F2 - Acquisition Parameters  
 Date\_ 20150407  
 Time\_ 23.14  
 INSTRUM spect  
 PROBHD 5 mm CPPBBO BB  
 PULPROG zg30  
 TD 65536  
 SOLVENT CDC13  
 NS 16  
 DS 2  
 SWH 12019.230 Hz  
 FIDRES 0.183399 Hz  
 AQ 2.7262976 sec  
 RG 31.94  
 DW 41.600 use  
 DE 10.00 use  
 TE 300.0 K  
 D1 1.00000000 sec  
 TD0 1

==== CHANNEL f1 =====  
 SFO1 600.1337060 MHz  
 NUC1 1H  
 P1 12.00 use  
 PLW1 23.00000000 W

F2 - Processing parameters  
 SI 65536  
 SF 600.1300161 MHz  
 WDW EM  
 SSB 0  
 LB 0.30 Hz  
 GB 0  
 PC 1.00

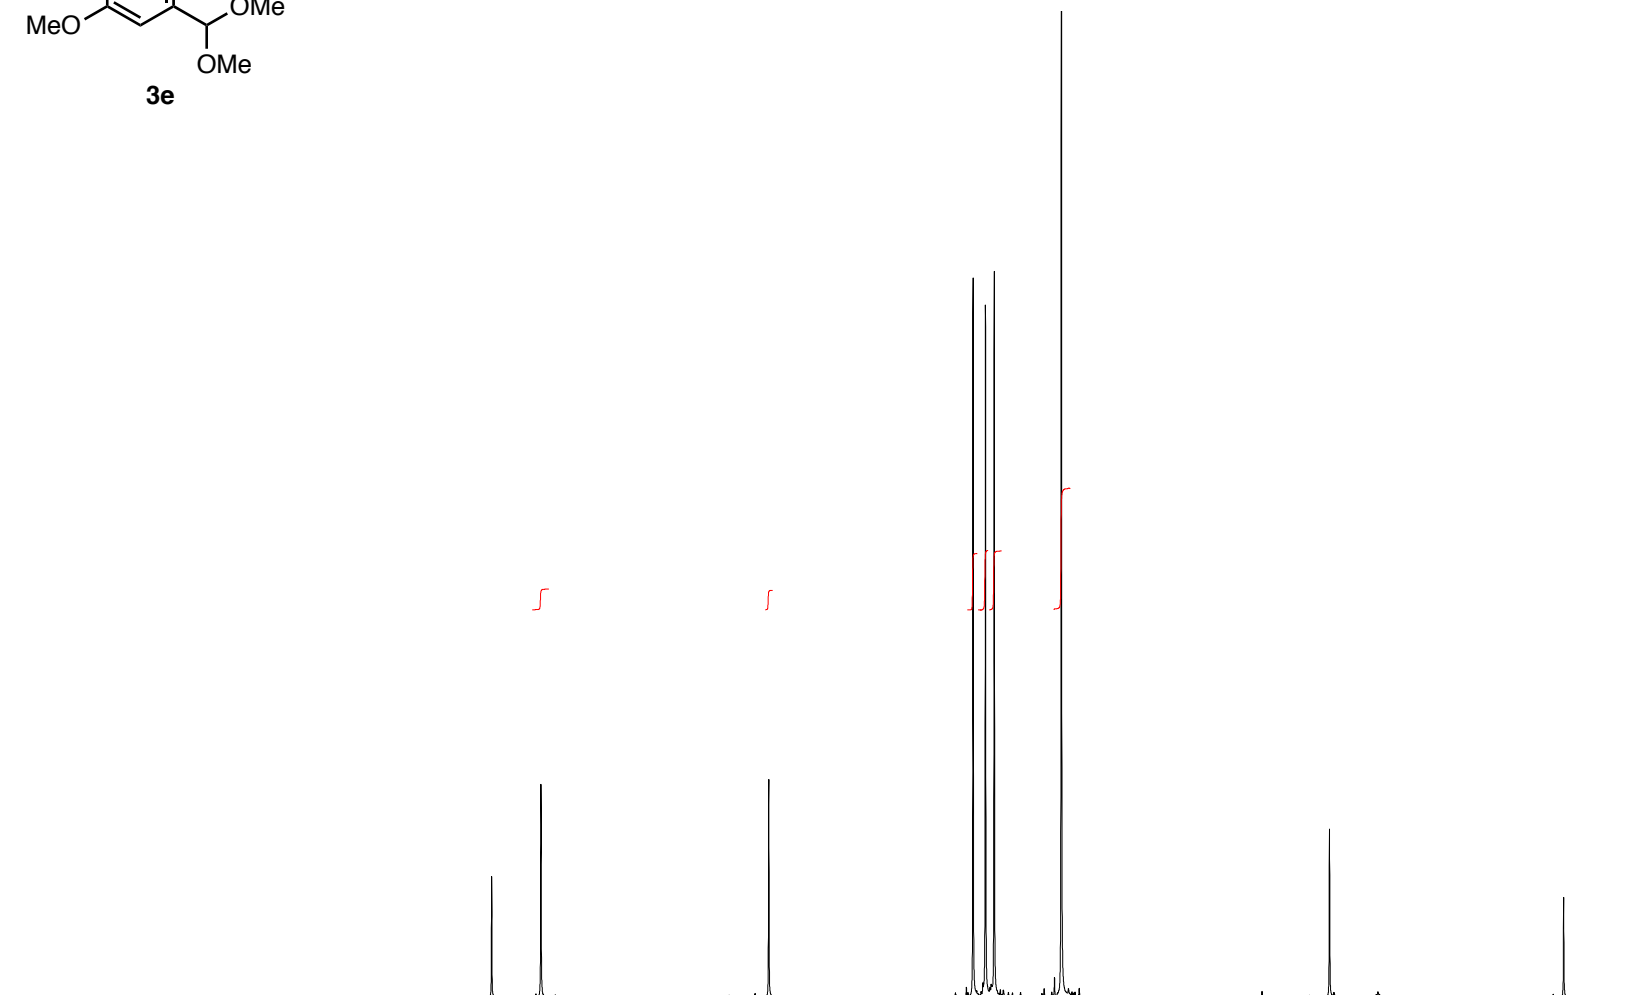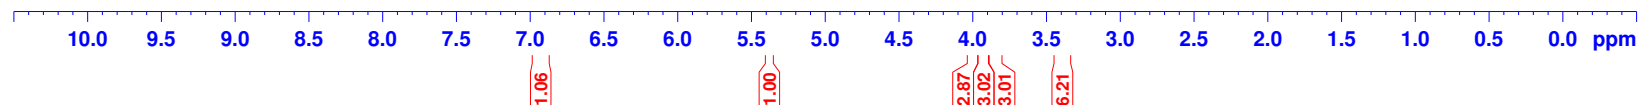

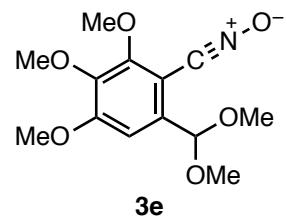

Current Data Parameters  
 NAME tri  
 EXPNO 11  
 PROCNO 1

F2 - Acquisition Parameters  
 Date\_ 20150407  
 Time\_ 23.31  
 INSTRUM spect  
 PROBHD 5 mm CPPBBO BB  
 PULPROG zgpg30  
 TD 65536  
 SOLVENT CDCl3  
 NS 128  
 DS 4  
 SWH 36057.691 Hz  
 FIDRES 0.550197 Hz  
 AQ 0.9087659 sec  
 RG 175.56  
 DW 13.867 use  
 DE 18.00 use  
 TE 300.0 K  
 D1 2.0000000 sec  
 D11 0.0300000 sec  
 TD0 1

==== CHANNEL f1 =====  
 SFO1 150.9178981 MHz  
 NUC1 13C  
 P1 10.00 use  
 PLW1 70.0000000 W

==== CHANNEL f2 =====  
 SFO2 600.1324005 MHz  
 NUC2 1H  
 CPDPRG[2] waltz16  
 PCPD2 70.00 use  
 PLW2 26.0000000 W  
 PLW12 0.76407999 W  
 PLW13 0.37439999 W

F2 - Processing parameters  
 SI 32768  
 SF 150.9028090 MHz  
 WDW EM  
 SSB 0  
 LB 1.00 Hz  
 GB 0  
 PC 1.40

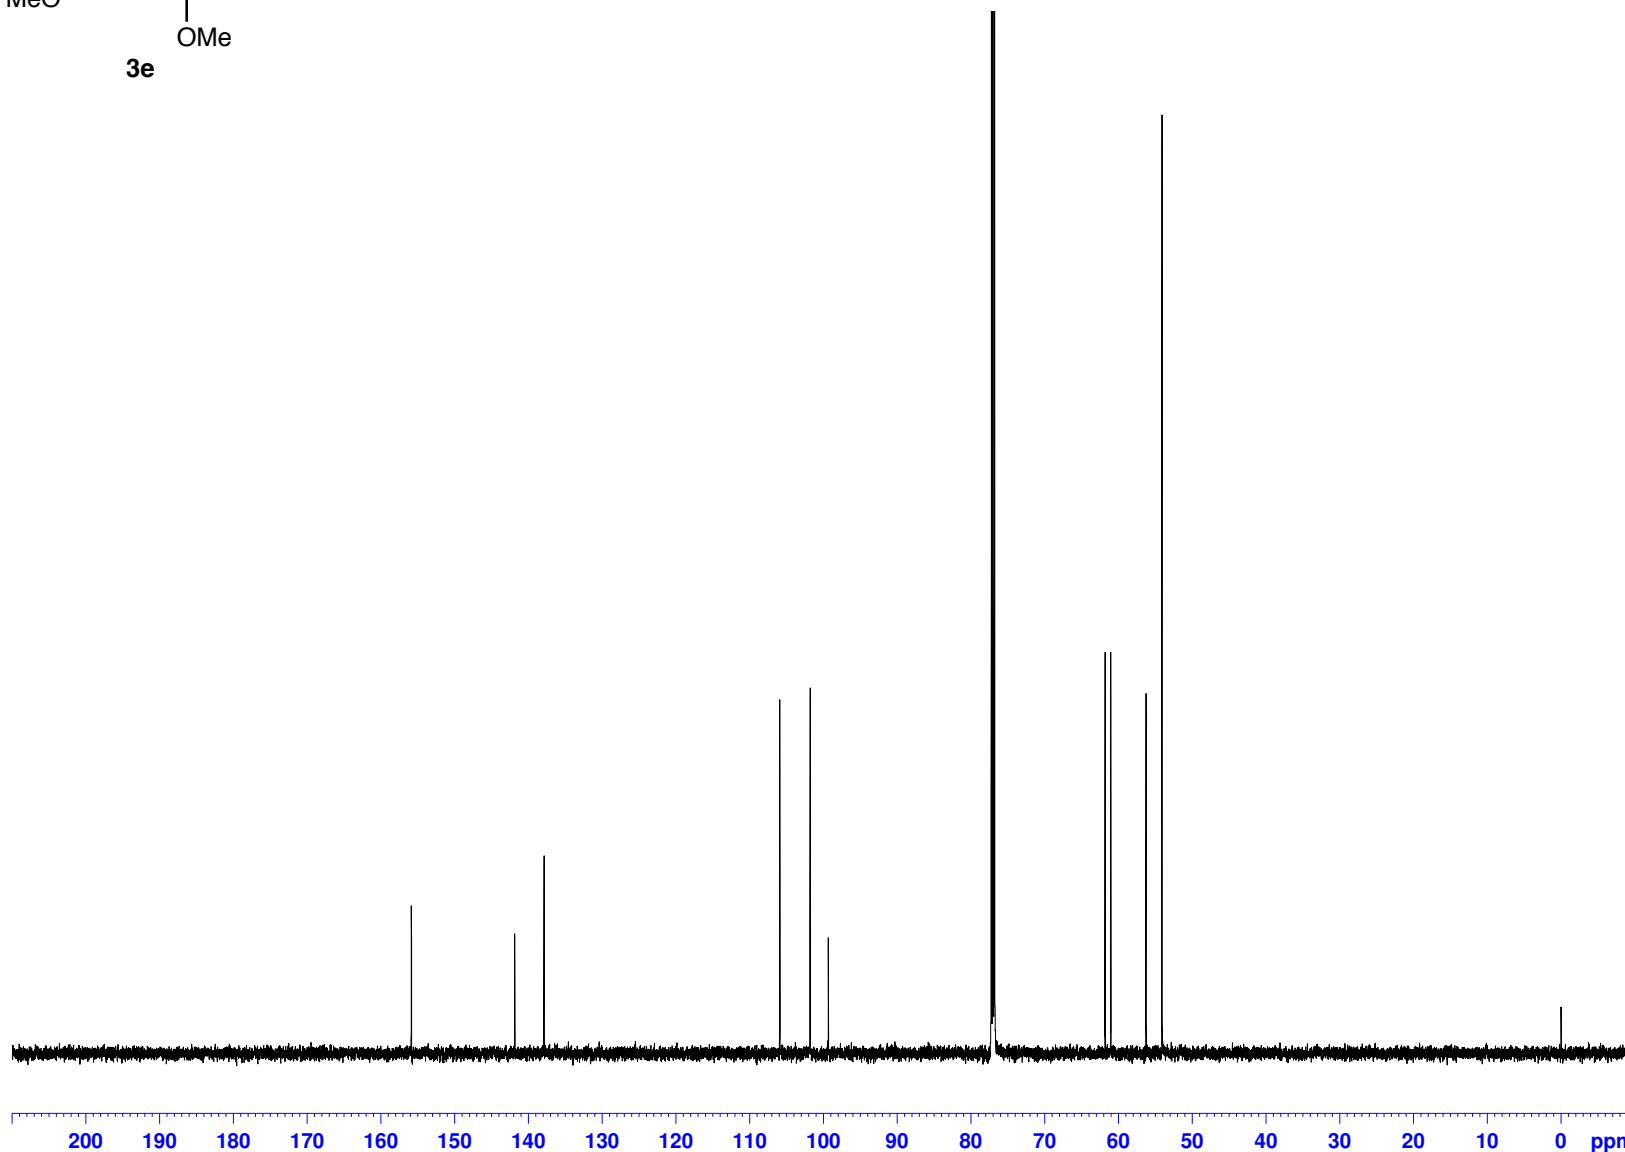

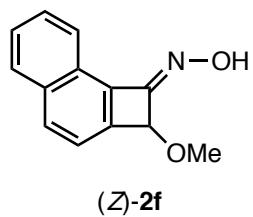

Current Data Parameters  
 NAME naphtho oxine-Z  
 EXPNO 10  
 PROCNO 1

F2 - Acquisition Parameters  
 Date\_ 20170119  
 Time\_ 13.25  
 INSTRUM spect  
 PROBHD 5 mm PABBO BB/  
 PULPROG zg30  
 TD 65536  
 SOLVENT Acetone  
 NS 16  
 DS 2  
 SWH 12019.230 Hz  
 FIDRES 0.183399 Hz  
 AQ 2.7262976 sec  
 RG 114  
 DW 41.600 use  
 DE 6.50 use  
 TE 298.0 K  
 D1 1.00000000 sec  
 TD0 1

==== CHANNEL f1 =====  
 SFO1 600.1337060 MHz  
 NUC1 1H  
 P1 12.00 use  
 PLW1 22.00000000 W

F2 - Processing parameters  
 SI 65536  
 SF 600.1300113 MHz  
 WDW EM  
 SSB 0  
 LB 0.30 Hz  
 GB 0  
 PC 1.00

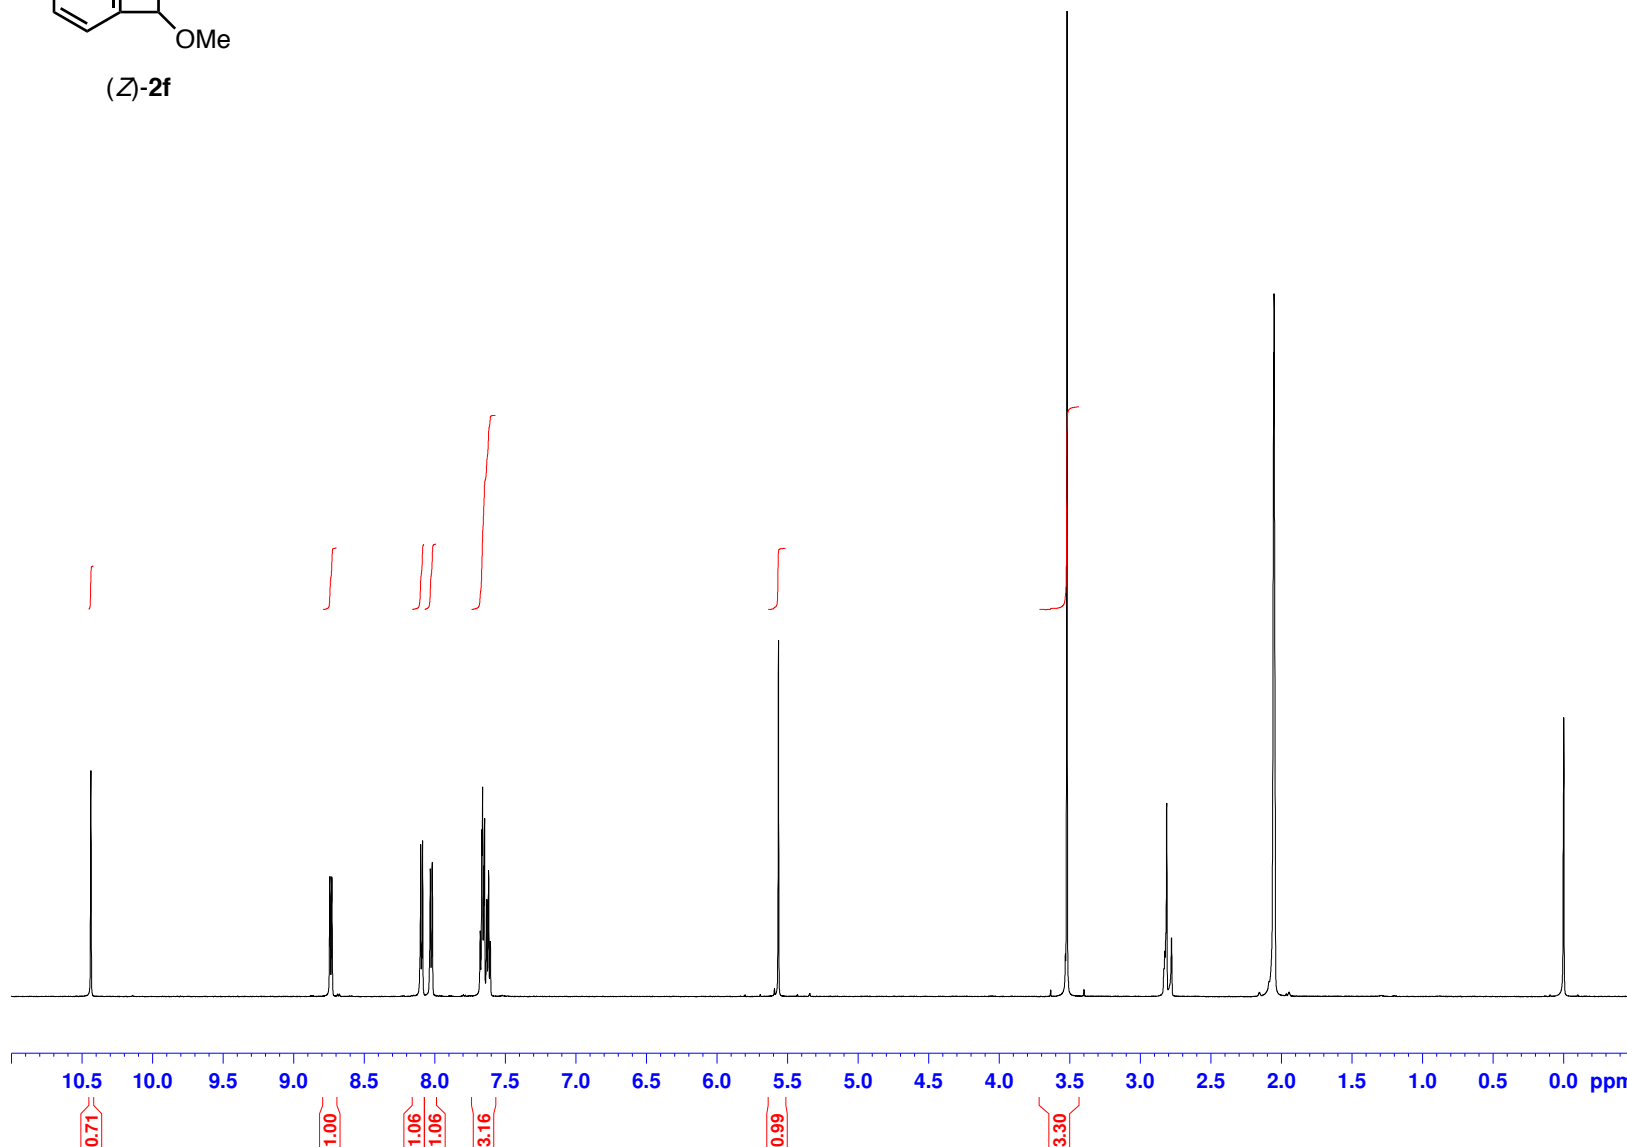

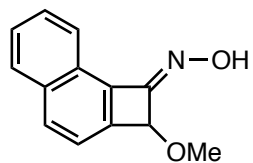

(Z)-2f

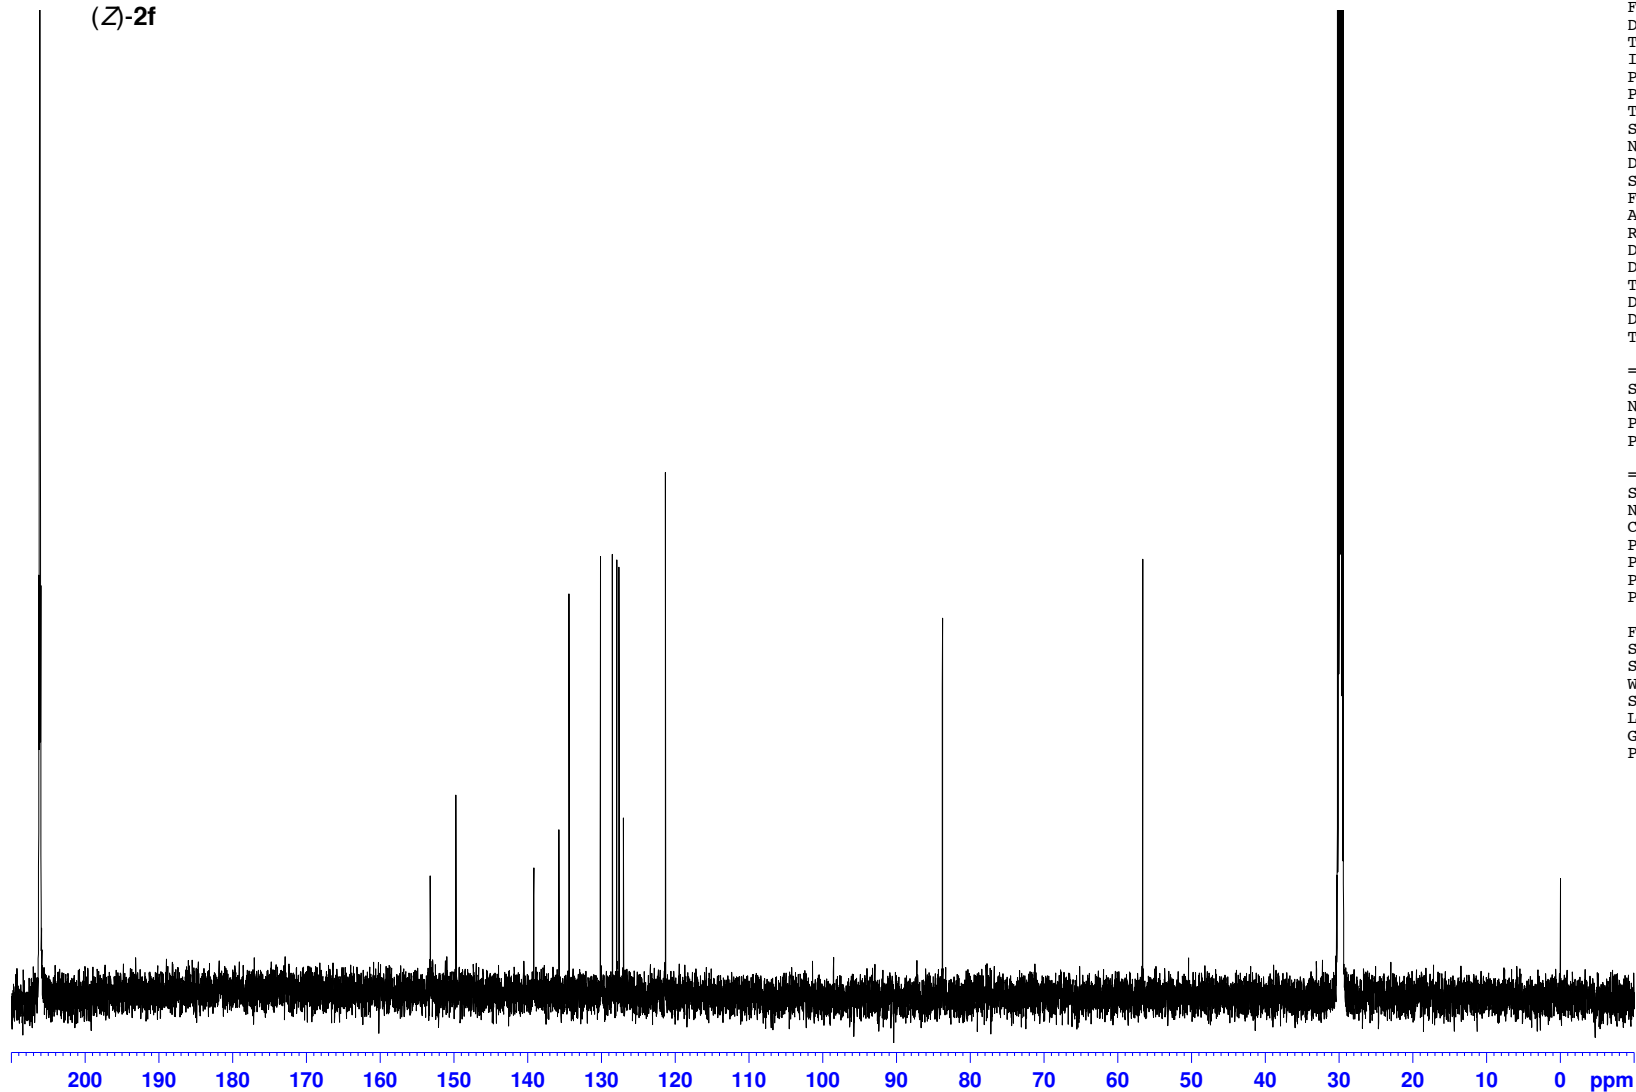

Current Data Parameters  
 NAME naphtho oxine-Z  
 EXPNO 11  
 PROCNO 1

F2 - Acquisition Parameters  
 Date\_ 20170119  
 Time\_ 13.23  
 INSTRUM spect  
 PROBHD 5 mm PABBO BB/  
 PULPROG zgpg30  
 TD 65536  
 SOLVENT Acetone  
 NS 1024  
 DS 4  
 SWH 36057.691 Hz  
 FIDRES 0.550197 Hz  
 AQ 0.9087659 sec  
 RG 175.56  
 DW 13.867 use  
 DE 6.50 use  
 TE 298.0 K  
 D1 2.0000000 sec  
 D11 0.0300000 sec  
 TD0 1

==== CHANNEL f1 =====  
 SFO1 150.9178981 MHz  
 NUC1 13C  
 P1 11.00 use  
 PLW1 93.0000000 W

==== CHANNEL f2 =====  
 SFO2 600.1324005 MHz  
 NUC2 1H  
 CPDPRG[2] waltz16  
 PCPD2 70.00 use  
 PLW2 22.0000000 W  
 PLW12 0.64652997 W  
 PLW13 0.31680000 W

F2 - Processing parameters  
 SI 32768  
 SF 150.9026725 MHz  
 WDW EM  
 SSB 0  
 LB 1.00 Hz  
 GB 0  
 PC 1.40

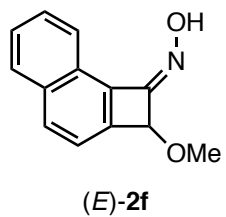

Current Data Parameters  
 NAME rs3-441-3  
 EXPNO 10  
 PROCNO 1

F2 - Acquisition Parameters  
 Date\_ 20161129  
 Time\_ 20.09  
 INSTRUM spect  
 PROBHD 5 mm PABBO BB/  
 PULPROG zg30  
 TD 65536  
 SOLVENT Acetone  
 NS 16  
 DS 2  
 SWH 12019.230 Hz  
 FIDRES 0.183399 Hz  
 AQ 2.7262976 sec  
 RG 83.7  
 DW 41.600 use  
 DE 6.50 use  
 TE 298.0 K  
 D1 1.0000000 sec  
 TD0 1

==== CHANNEL f1 =====  
 SFO1 600.1337060 MHz  
 NUC1 1H  
 P1 12.00 use  
 PLW1 22.0000000 W

F2 - Processing parameters  
 SI 65536  
 SF 600.1300111 MHz  
 WDW EM  
 SSB 0  
 LB 0.30 Hz  
 GB 0  
 PC 1.00

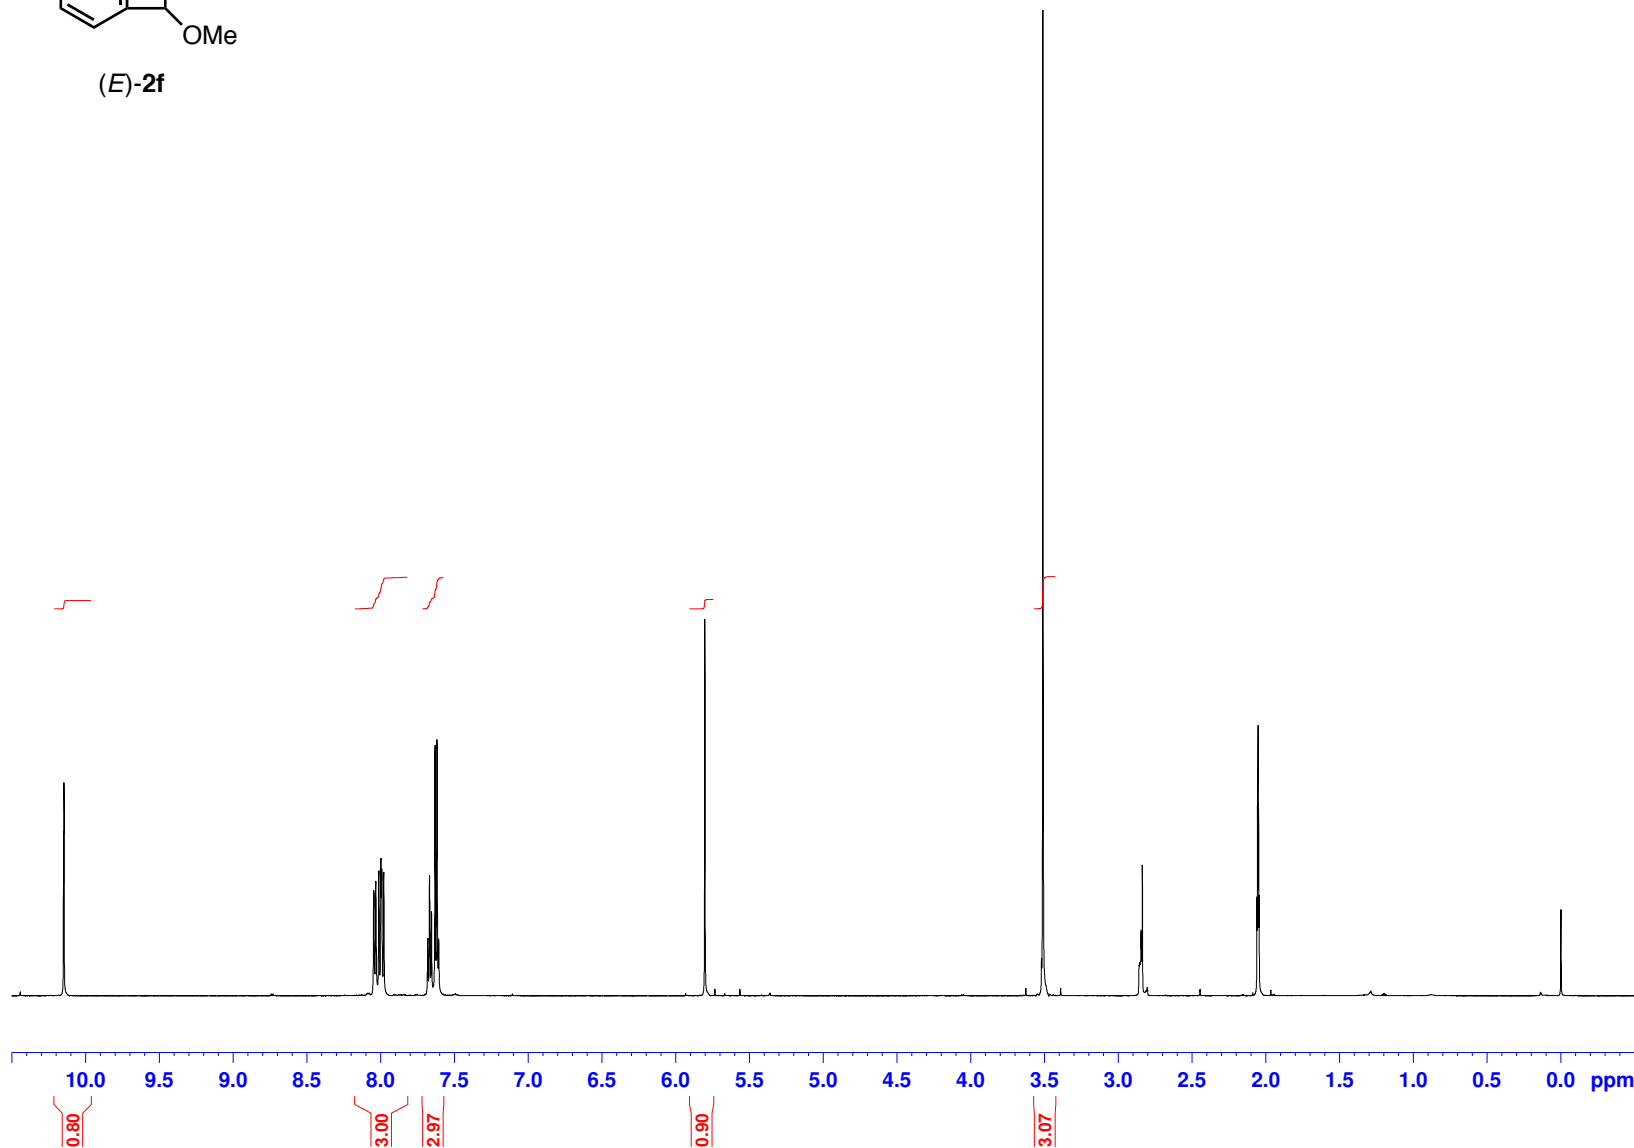

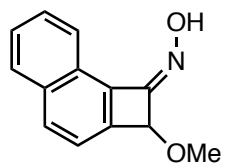

(E)-2f

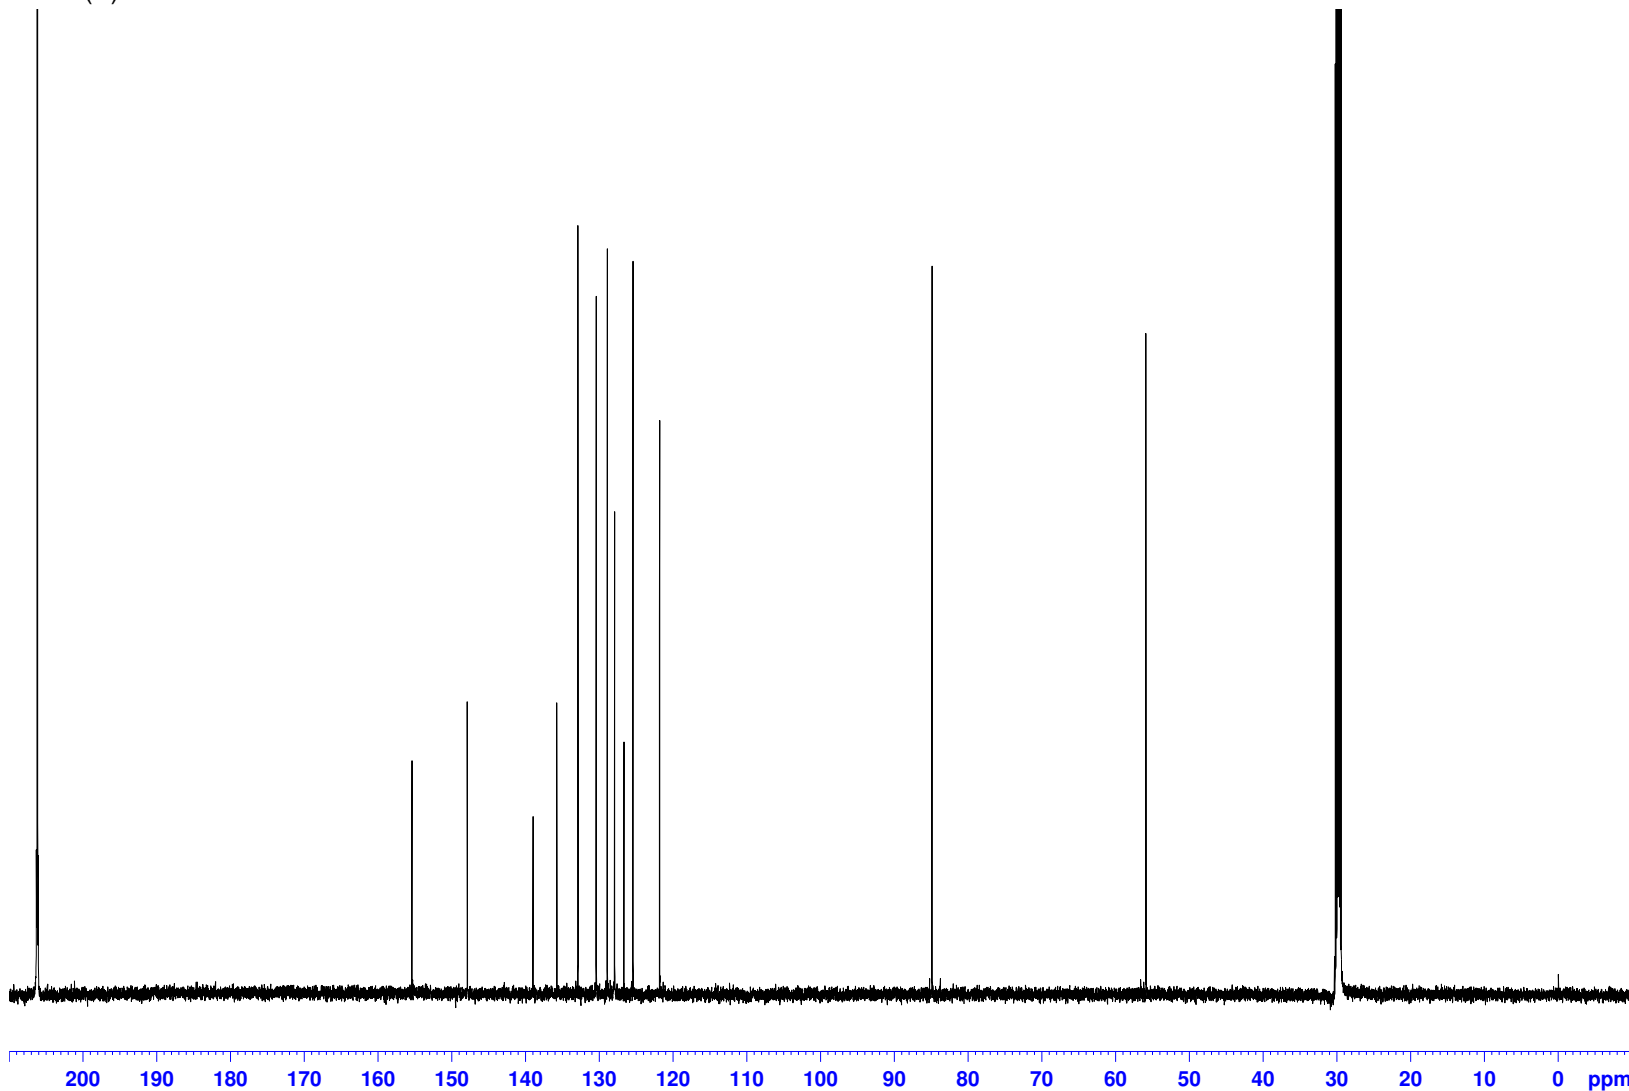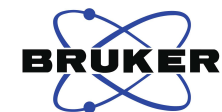

Current Data Parameters  
 NAME rs3-441-3  
 EXPNO 20  
 PROCNO 1

F2 - Acquisition Parameters  
 Date\_ 20161202  
 Time 0.54  
 INSTRUM spect  
 PROBHD 5 mm PABBO BB/  
 PULPROG zgpg30  
 TD 65536  
 SOLVENT Acetone  
 NS 1024  
 DS 4  
 SWH 36057.691 Hz  
 FIDRES 0.550197 Hz  
 AQ 0.9087659 sec  
 RG 175.56  
 DW 13.867 use  
 DE 6.50 use  
 TE 298.0 K  
 D1 2.0000000 sec  
 D11 0.0300000 sec  
 TD0 1

==== CHANNEL f1 =====  
 SFO1 150.9178981 MHz  
 NUC1 13C  
 P1 11.00 use  
 PLW1 93.0000000 W

==== CHANNEL f2 =====  
 SFO2 600.1324005 MHz  
 NUC2 1H  
 CPDPRG[2] waltz16  
 PCPD2 70.00 use  
 PLW2 22.0000000 W  
 PLW12 0.64652997 W  
 PLW13 0.31680000 W

F2 - Processing parameters  
 SI 32768  
 SF 150.9026737 MHz  
 WDW EM  
 SSB 0  
 LB 1.00 Hz  
 GB 0  
 PC 1.40



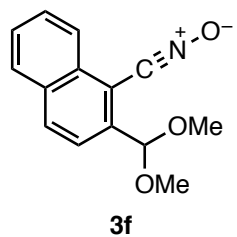

Current Data Parameters  
 NAME nitri 1  
 EXPNO 10  
 PROCNO 1

F2 - Acquisition Parameters  
 Date\_ 20170118  
 Time\_ 23.34  
 INSTRUM spect  
 PROBHD 5 mm PABBO BB/  
 PULPROG zg30  
 TD 65536  
 SOLVENT CDC13  
 NS 16  
 DS 2  
 SWH 12019.230 Hz  
 FIDRES 0.183399 Hz  
 AQ 2.7262976 sec  
 RG 87.68  
 DW 41.600 use  
 DE 6.50 use  
 TE 298.0 K  
 D1 1.00000000 sec  
 TD0 1

==== CHANNEL f1 =====  
 SFO1 600.1337060 MHz  
 NUC1 1H  
 P1 12.00 use  
 PLW1 22.00000000 W

F2 - Processing parameters  
 SI 65536  
 SF 600.1300183 MHz  
 WDW EM  
 SSB 0  
 LB 0.30 Hz  
 GB 0  
 PC 1.00

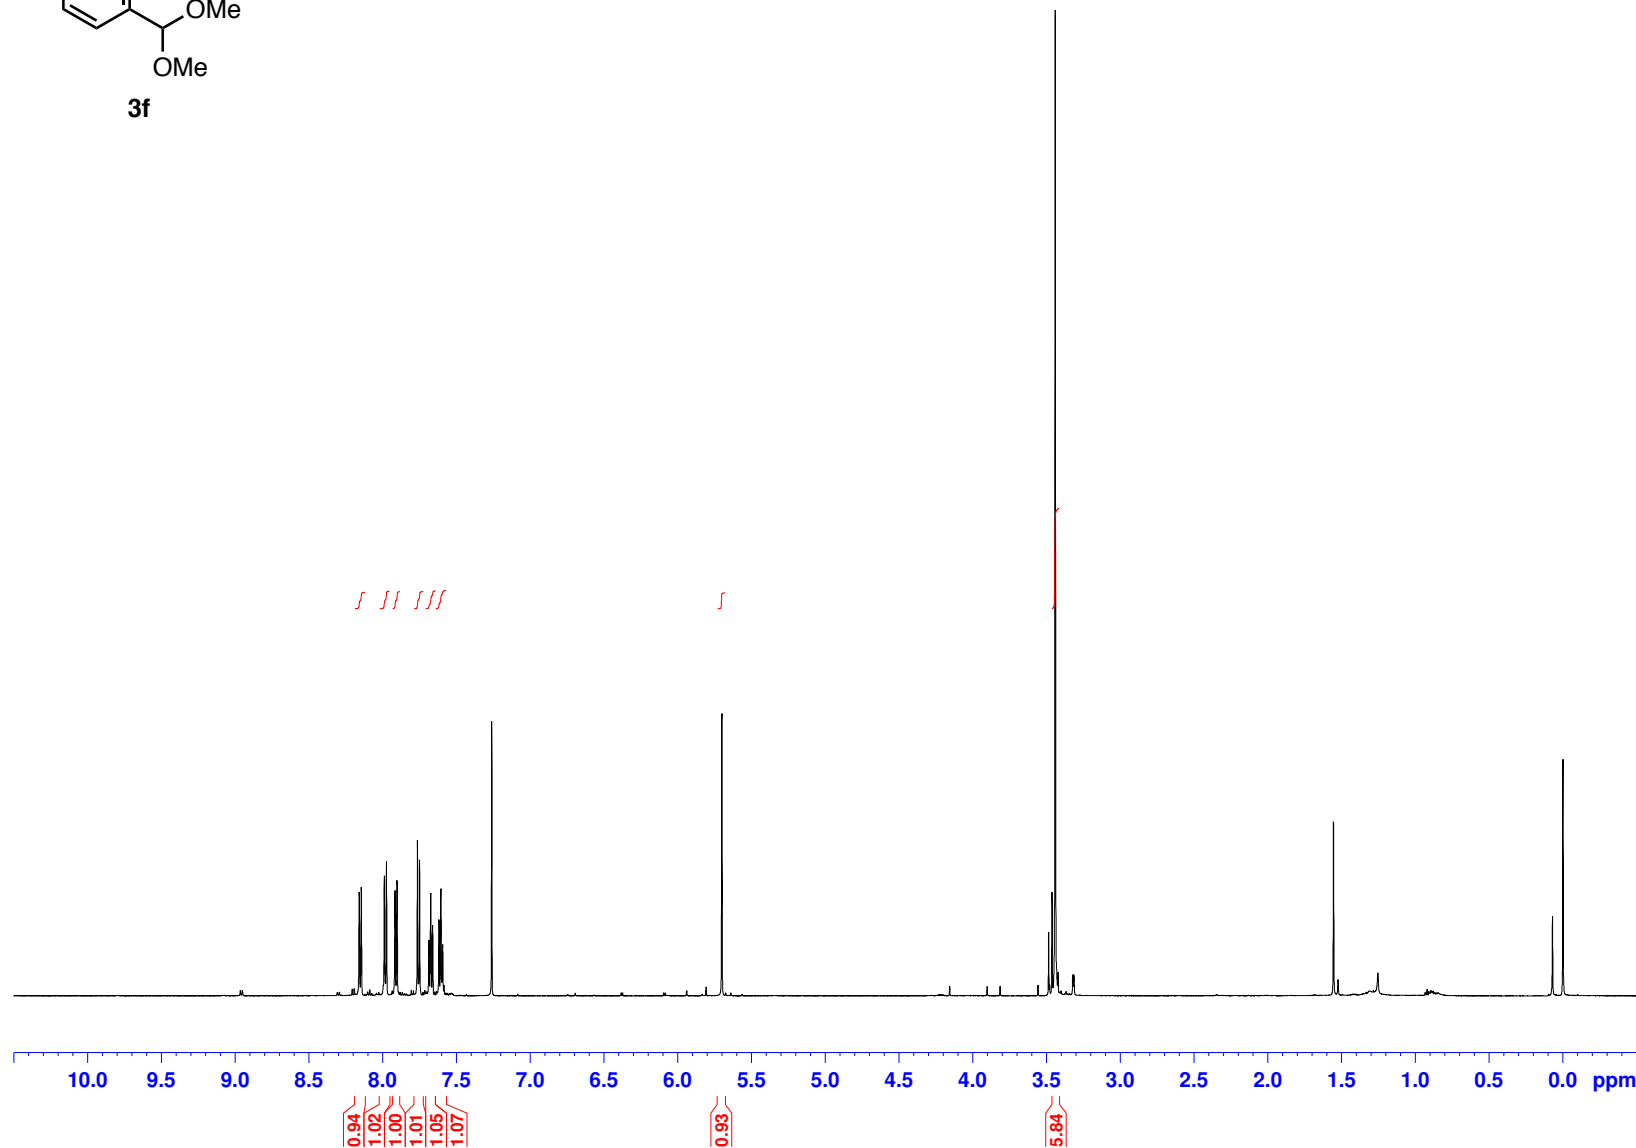



Current Data Parameters  
 NAME nitri 1  
 EXPNO 11  
 PROCNO 1

F2 - Acquisition Parameters  
 Date\_ 20170119  
 Time\_ 5.56  
 INSTRUM spect  
 PROBHD 5 mm PABBO BB/  
 PULPROG zgpg30  
 TD 65536  
 SOLVENT CDC13  
 NS 3500  
 DS 4  
 SWH 36057.691 Hz  
 FIDRES 0.550197 Hz  
 AQ 0.9087659 sec  
 RG 175.56  
 DW 13.867 use  
 DE 6.50 use  
 TE 298.0 K  
 D1 2.0000000 sec  
 D11 0.0300000 sec  
 TD0 1

==== CHANNEL f1 =====  
 SFO1 150.9178981 MHz  
 NUC1 13C  
 P1 11.00 use  
 PLW1 93.0000000 W

==== CHANNEL f2 =====  
 SFO2 600.1324005 MHz  
 NUC2 1H  
 CPDPRG[2] waltz16  
 PCPD2 70.00 use  
 PLW2 22.0000000 W  
 PLW12 0.64652997 W  
 PLW13 0.31680000 W

F2 - Processing parameters  
 SI 32768  
 SF 150.9028096 MHz  
 WDW EM  
 SSB 0  
 LB 1.00 Hz  
 GB 0  
 PC 1.40

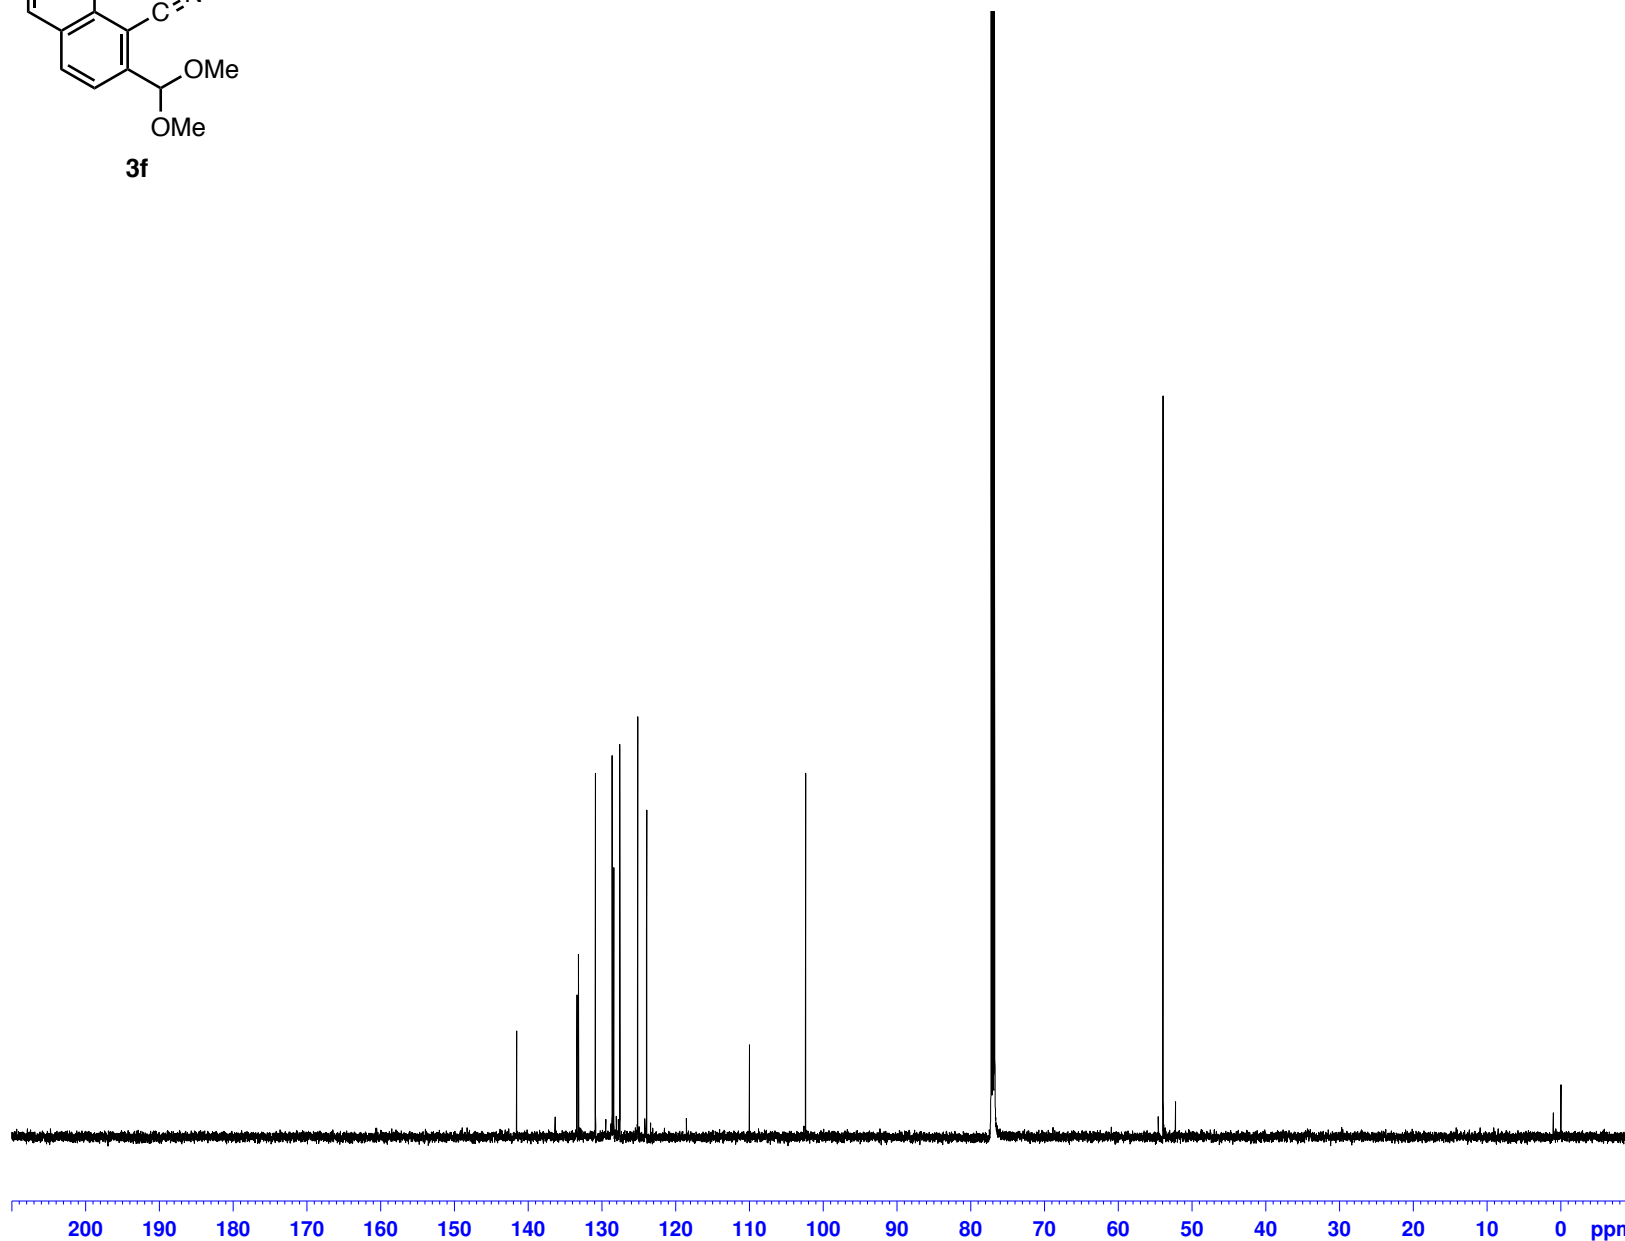



Current Data Parameters  
NAME 70-1  
EXPNO 10  
PROCNO 1

F2 - Acquisition Parameters  
Date\_ 20150603  
Time\_ 22.43  
INSTRUM spect  
PROBHD 5 mm CPPBBO BB  
PULPROG zg30  
TD 65536  
SOLVENT Acetone  
NS 16  
DS 2  
SWH 12019.230 Hz  
FIDRES 0.183399 Hz  
AQ 2.7262976 sec  
RG 31.94  
DW 41.600 use  
DE 10.00 use  
TE 300.0 K  
D1 1.0000000 sec  
TD0 1

==== CHANNEL f1 =====  
SFO1 600.1337060 MHz  
NUC1 1H  
P1 12.00 use  
PLW1 23.0000000 W

F2 - Processing parameters  
SI 65536  
SF 600.1300115 MHz  
WDW EM  
SSB 0  
LB 0.30 Hz  
GB 0  
PC 1.00

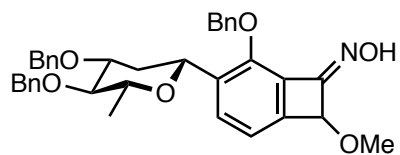

2g

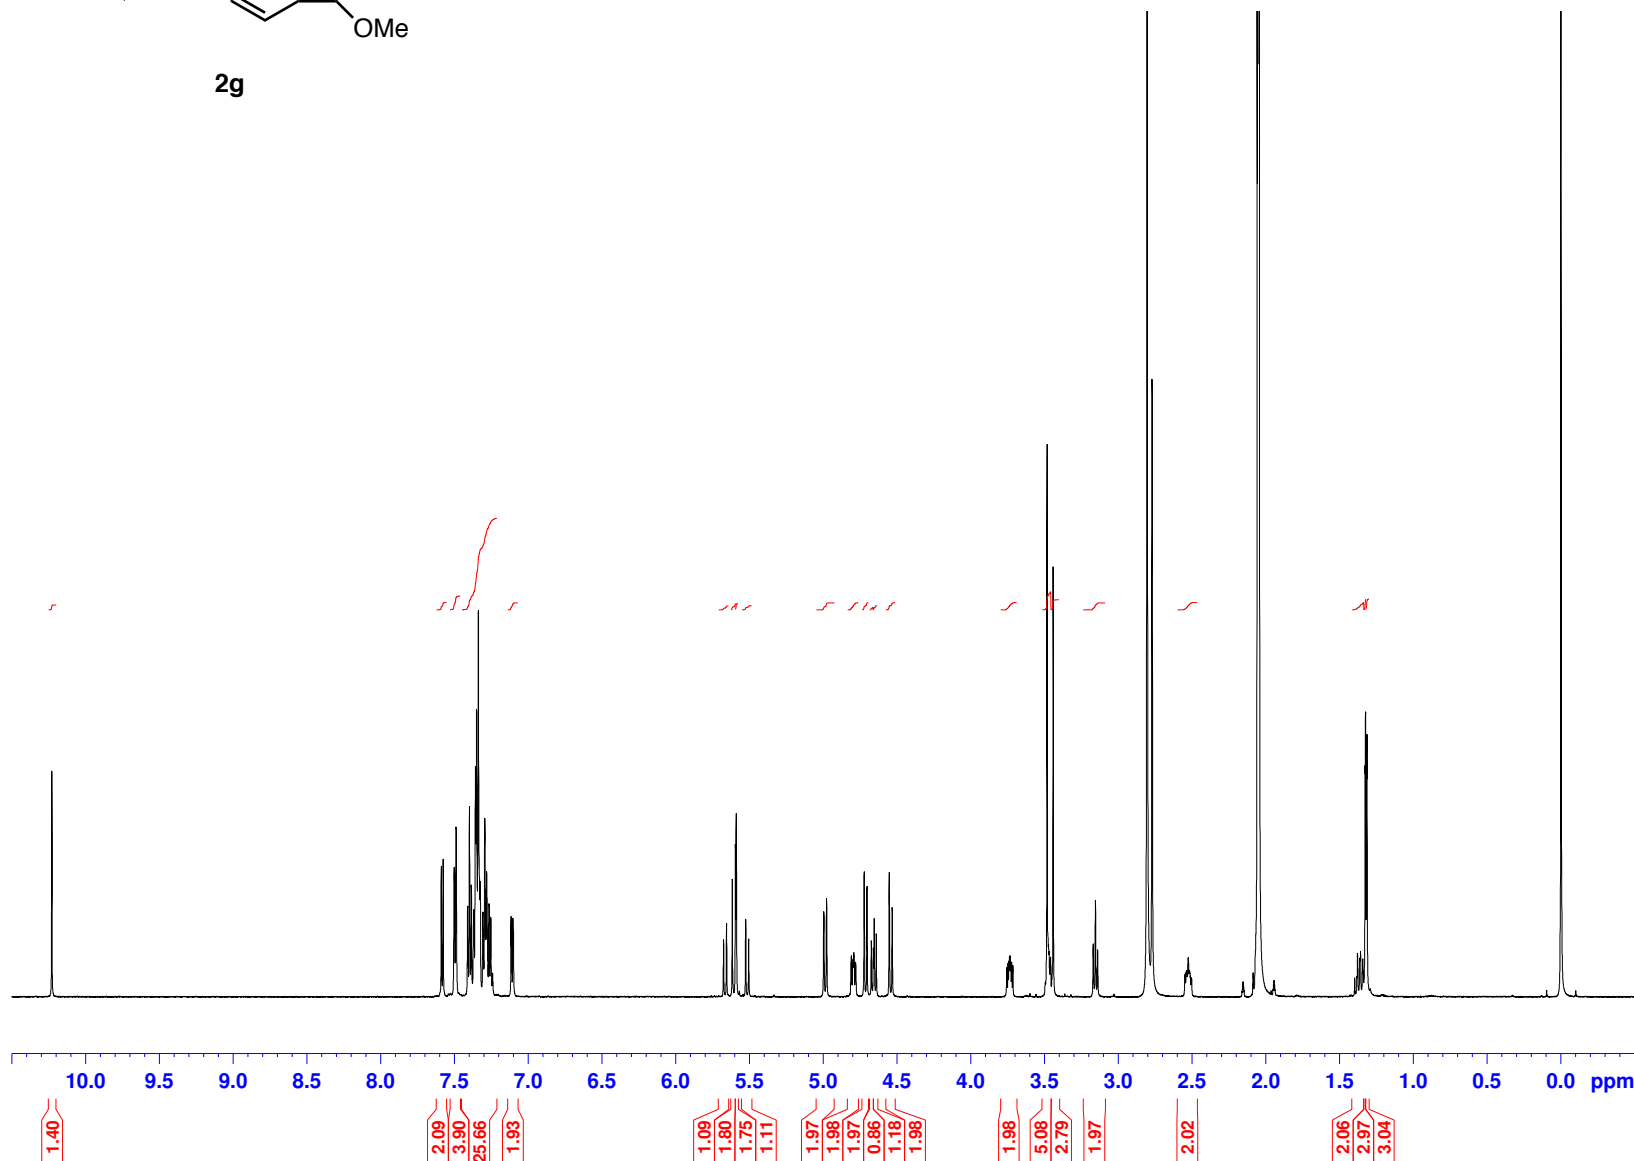

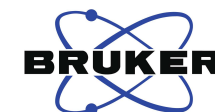

Current Data Parameters  
NAME 70-1 13C  
EXPNO 10  
PROCNO 1

F2 - Acquisition Parameters  
Date\_ 20150604  
Time\_ 4.22  
INSTRUM spect  
PROBHD 5 mm CPPBBO BB  
PULPROG zgpg30  
TD 65536  
SOLVENT Acetone  
NS 1024  
DS 4  
SWH 36057.691 Hz  
FIDRES 0.550197 Hz  
AQ 0.9087659 sec  
RG 175.56  
DW 13.867 use  
DE 18.00 use  
TE 300.0 K  
D1 2.0000000 sec  
D11 0.0300000 sec  
TD0 1

==== CHANNEL f1 =====  
SFO1 150.9178981 MHz  
NUC1 13C  
P1 10.00 use  
PLW1 70.0000000 W

==== CHANNEL f2 =====  
SFO2 600.1324005 MHz  
NUC2 1H  
CPDPRG[2] waltz16  
PCPD2 70.00 use  
PLW2 26.0000000 W  
PLW12 0.76407999 W  
PLW13 0.37439999 W

F2 - Processing parameters  
SI 32768  
SF 150.9026725 MHz  
WDW EM  
SSB 0  
LB 1.00 Hz  
GB 0  
PC 1.40

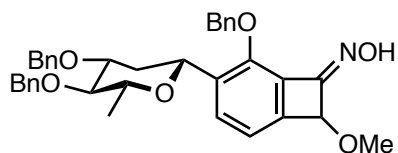

2g

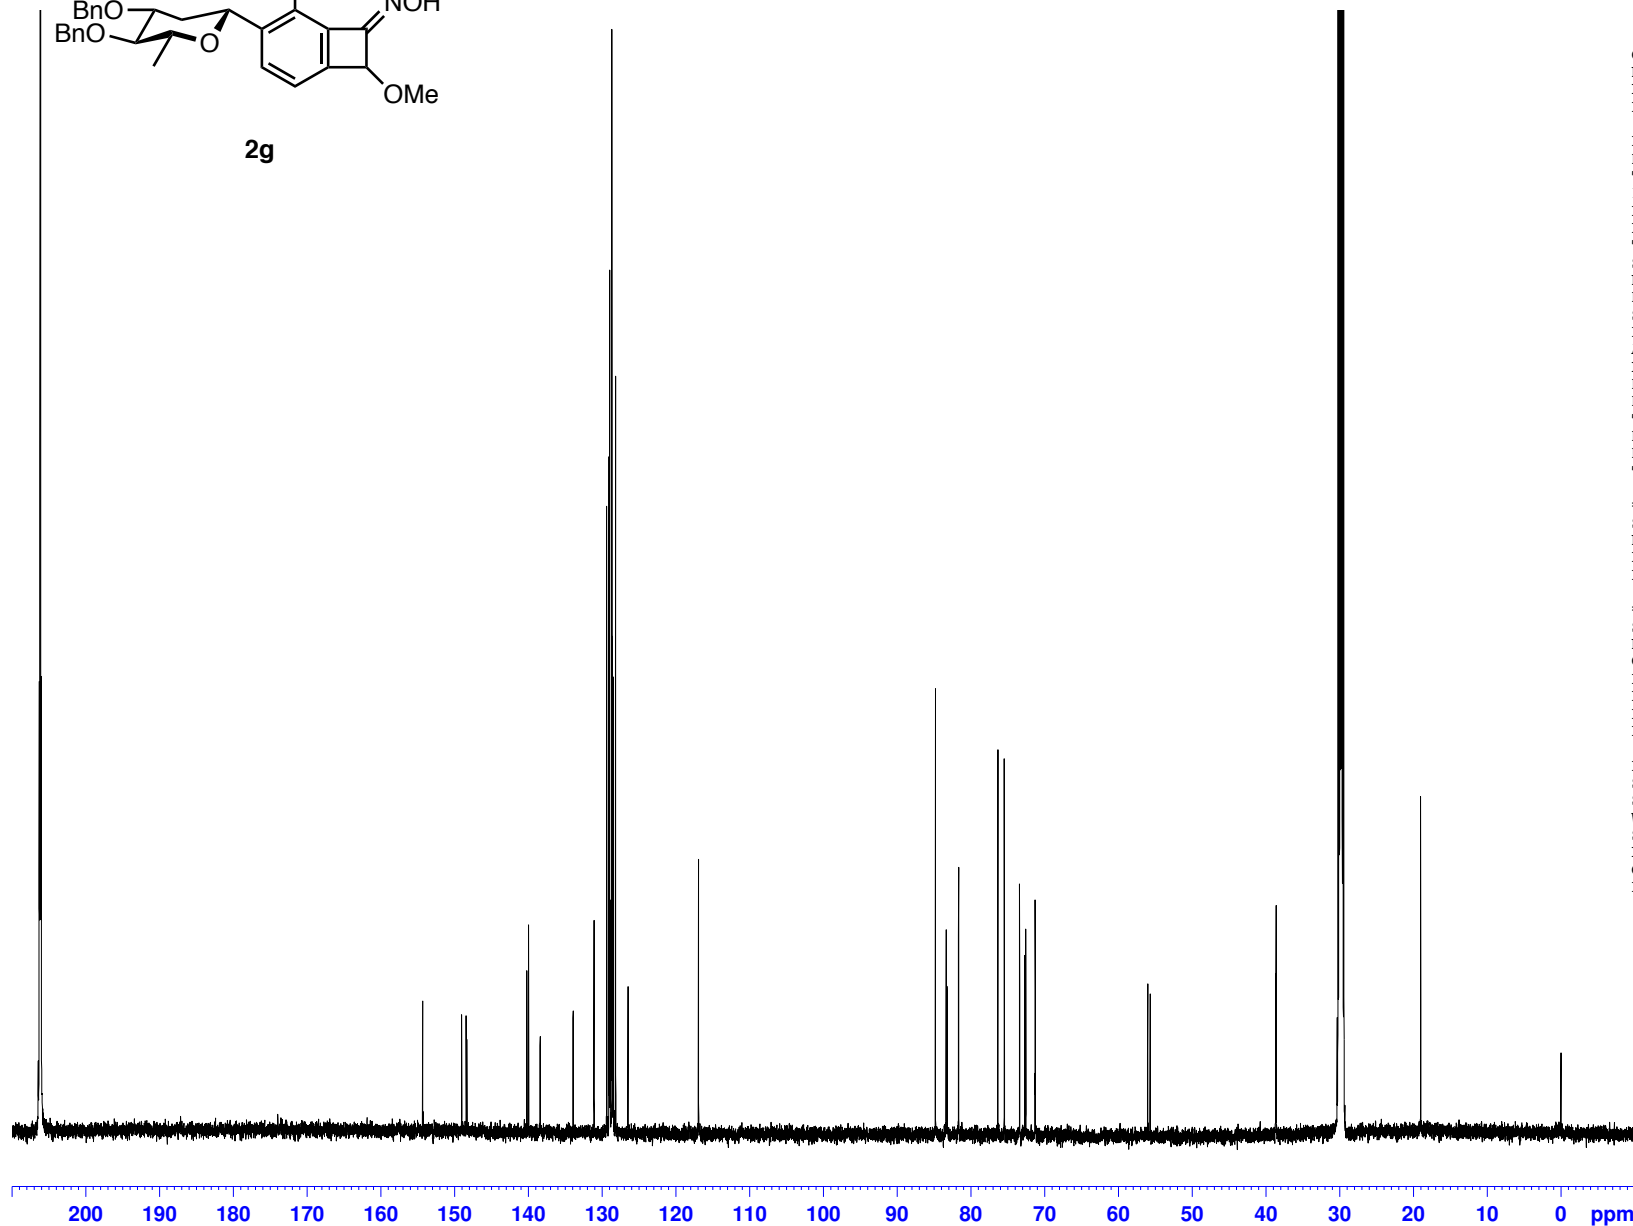



Current Data Parameters  
NAME rs3-102-1-2  
EXPNO 11  
PROCNO 1

F2 - Acquisition Parameters  
Date\_ 20150528  
Time 18.51  
INSTRUM spect  
PROBHD 5 mm CPPBBO BB  
PULPROG zg30  
TD 65536  
SOLVENT CDCl3  
NS 16  
DS 2  
SWH 12019.230 Hz  
FIDRES 0.183399 Hz  
AQ 2.7262976 sec  
RG 31.94  
DW 41.600 use  
DE 10.00 use  
TE 291.5 K  
D1 1.0000000 sec  
TD0 1

==== CHANNEL f1 =====  
SFO1 600.1337060 MHz  
NUC1 1H  
P1 12.00 use  
PLW1 23.0000000 W

F2 - Processing parameters  
SI 65536  
SF 600.1300142 MHz  
WDW EM  
SSB 0  
LB 0.30 Hz  
GB 0  
PC 1.00

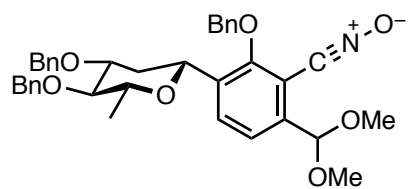

3g

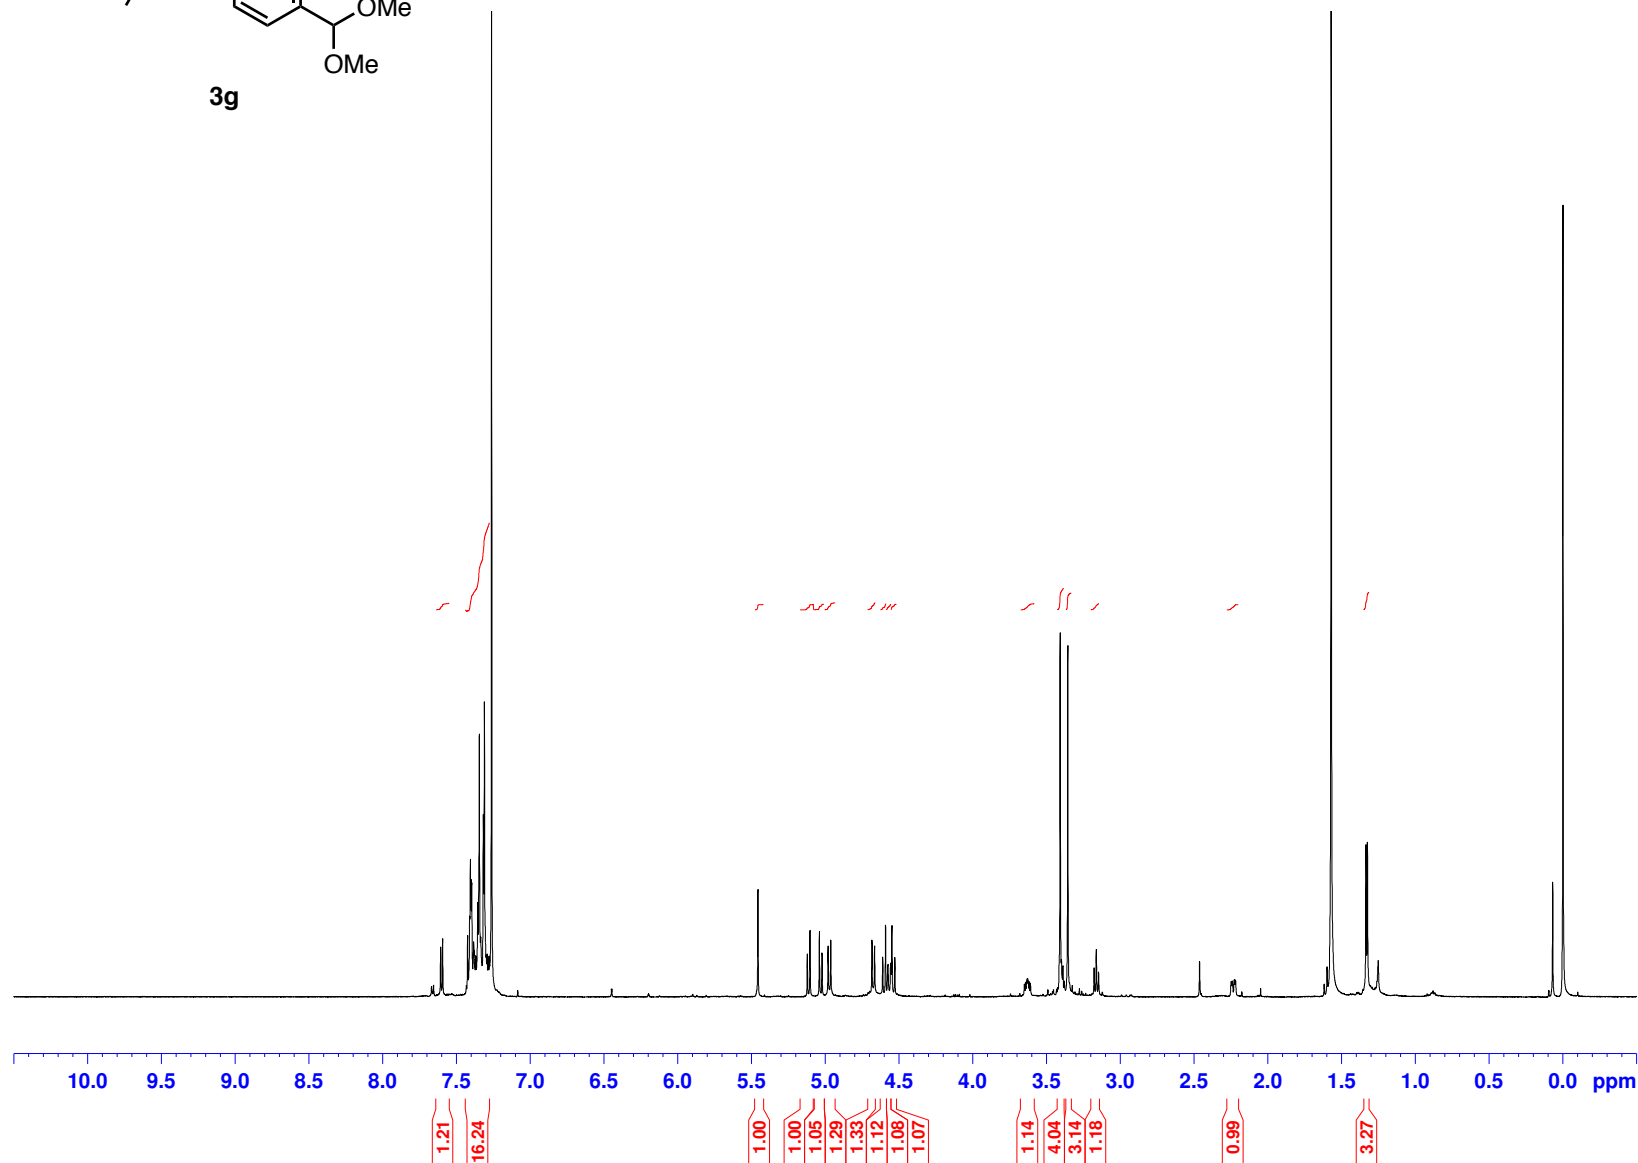

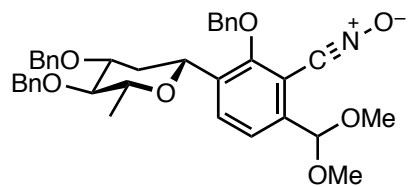

3g



Current Data Parameters  
 NAME rs3-102-1  
 EXPNO 40  
 PROCNO 1

F2 - Acquisition Parameters  
 Date\_ 20150529  
 Time\_ 4.56  
 INSTRUM spect  
 PROBHD 5 mm CPPBBO BB  
 PULPROG zgpg30  
 TD 65536  
 SOLVENT CDC13  
 NS 1024  
 DS 4  
 SWH 36057.691 Hz  
 FIDRES 0.550197 Hz  
 AQ 0.9087659 sec  
 RG 175.56  
 DW 13.867 use  
 DE 18.00 use  
 TE 291.5 K  
 D1 2.0000000 sec  
 D11 0.0300000 sec  
 TD0 1

==== CHANNEL f1 =====  
 SFO1 150.9178981 MHz  
 NUC1 13C  
 P1 10.00 use  
 PLW1 70.0000000 W

==== CHANNEL f2 =====  
 SFO2 600.1324005 MHz  
 NUC2 1H  
 CPDPRG[2] waltz16  
 PCPD2 70.00 use  
 PLW2 26.0000000 W  
 PLW12 0.76407999 W  
 PLW13 0.37439999 W

F2 - Processing parameters  
 SI 32768  
 SF 150.9028167 MHz  
 WDW EM  
 SSB 0  
 LB 1.00 Hz  
 GB 0  
 PC 1.40

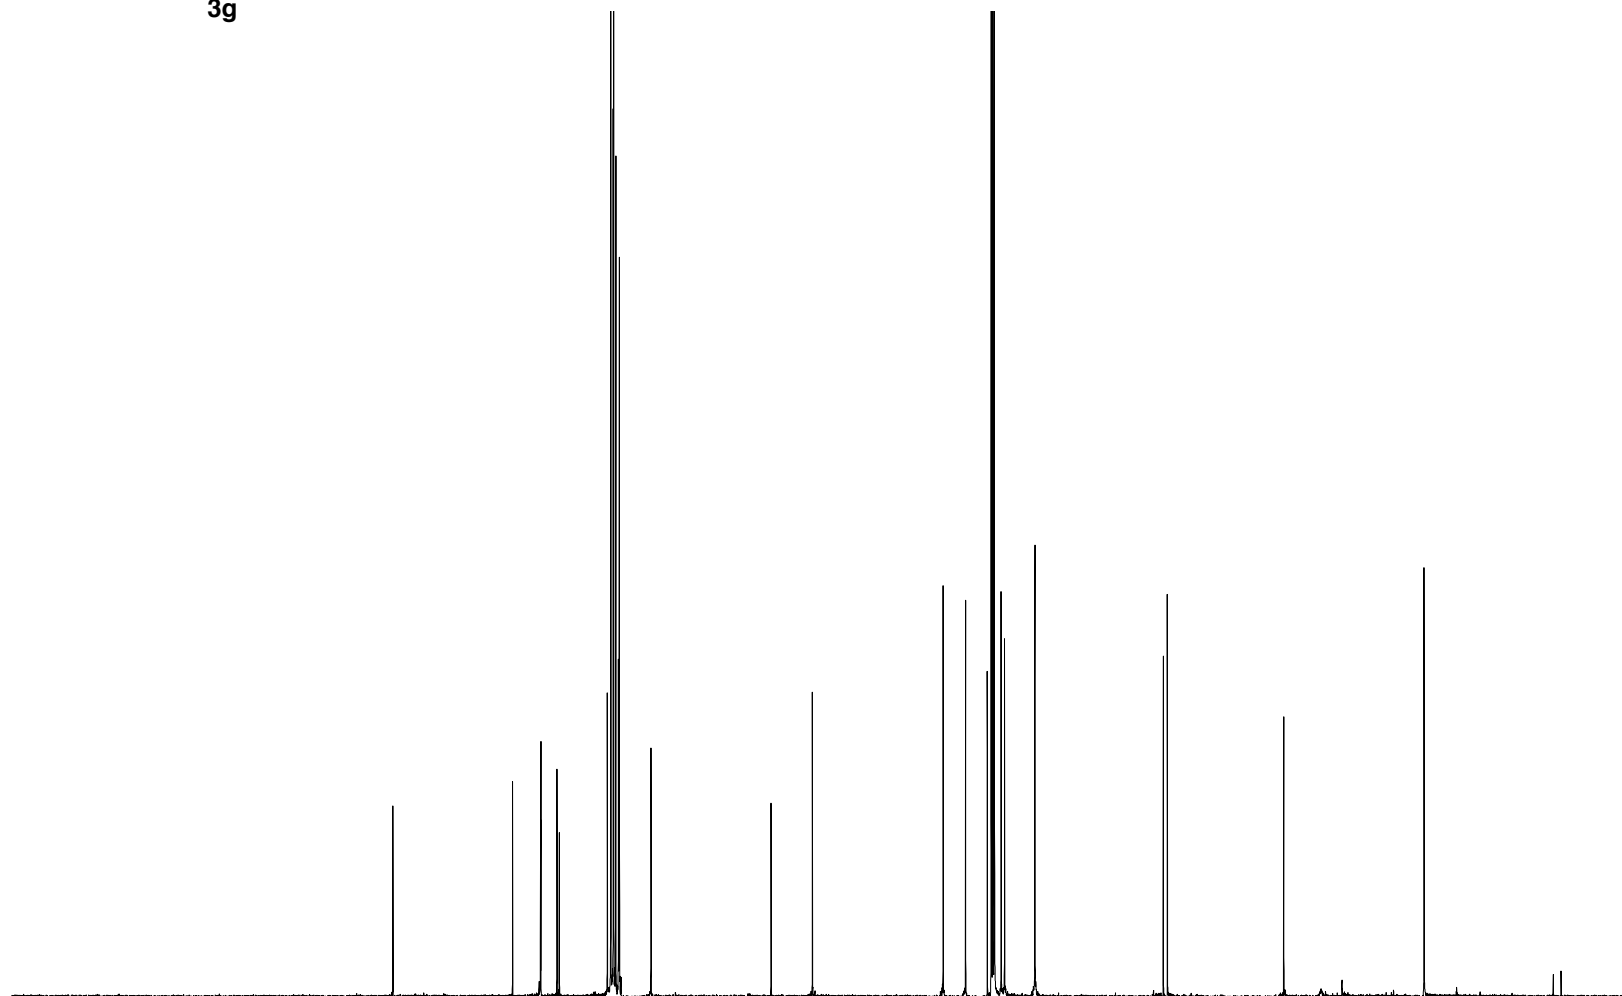

200 190 180 170 160 150 140 130 120 110 100 90 80 70 60 50 40 30 20 10 0 ppm

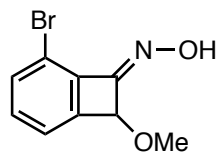

(Z)-2h



Current Data Parameters  
 NAME rs3-148-1  
 EXPNO 30  
 PROCNO 1

F2 - Acquisition Parameters  
 Date\_ 20150331  
 Time\_ 21.52  
 INSTRUM spect  
 PROBHD 5 mm CPPBBO BB  
 PULPROG zg30  
 TD 65536  
 SOLVENT Acetic  
 NS 16  
 DS 2  
 SWH 12019.230 Hz  
 FIDRES 0.183399 Hz  
 AQ 2.7262976 sec  
 RG 31.94  
 DW 41.600 use  
 DE 10.00 use  
 TE 300.0 K  
 D1 1.00000000 sec  
 TD0 1

==== CHANNEL f1 =====  
 SFO1 600.1337060 MHz  
 NUC1 1H  
 P1 12.00 use  
 PLW1 23.00000000 W

F2 - Processing parameters  
 SI 65536  
 SF 600.1300045 MHz  
 WDW EM  
 SSB 0  
 LB 0.30 Hz  
 GB 0  
 PC 1.00

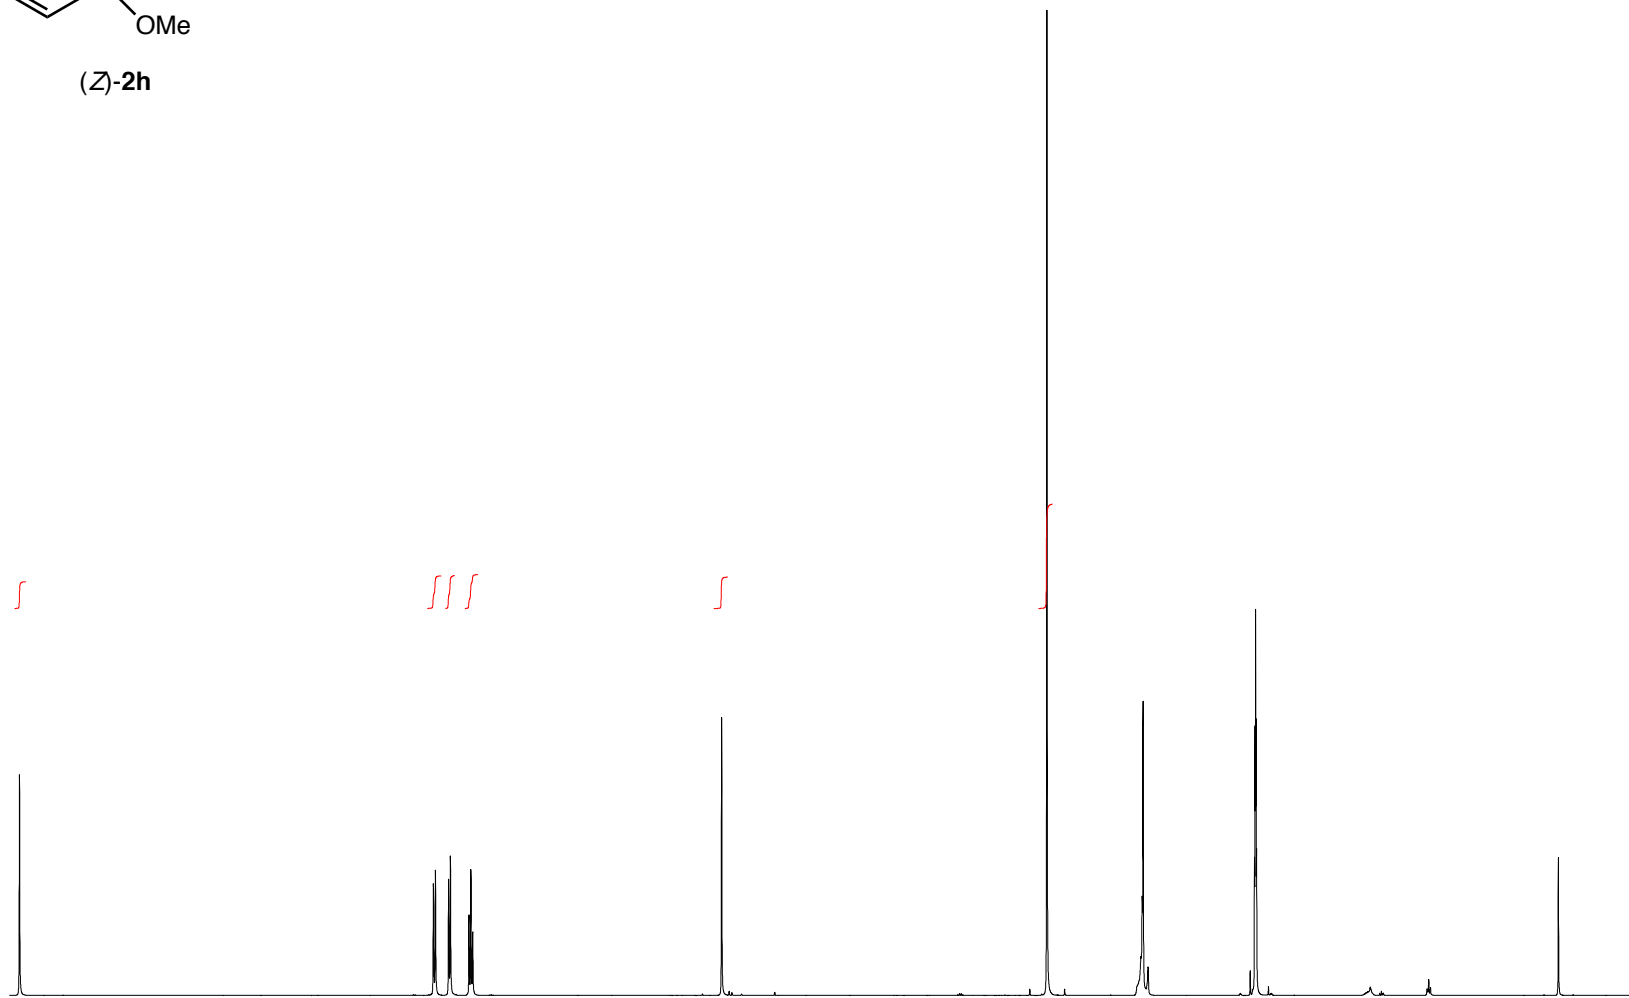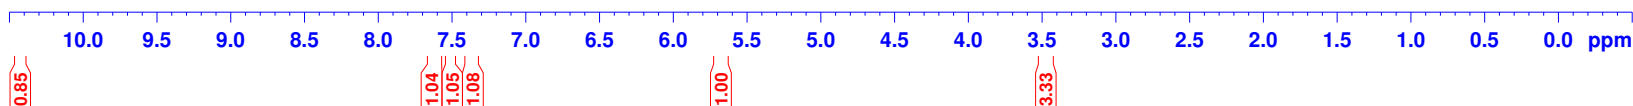



(Z)-2h

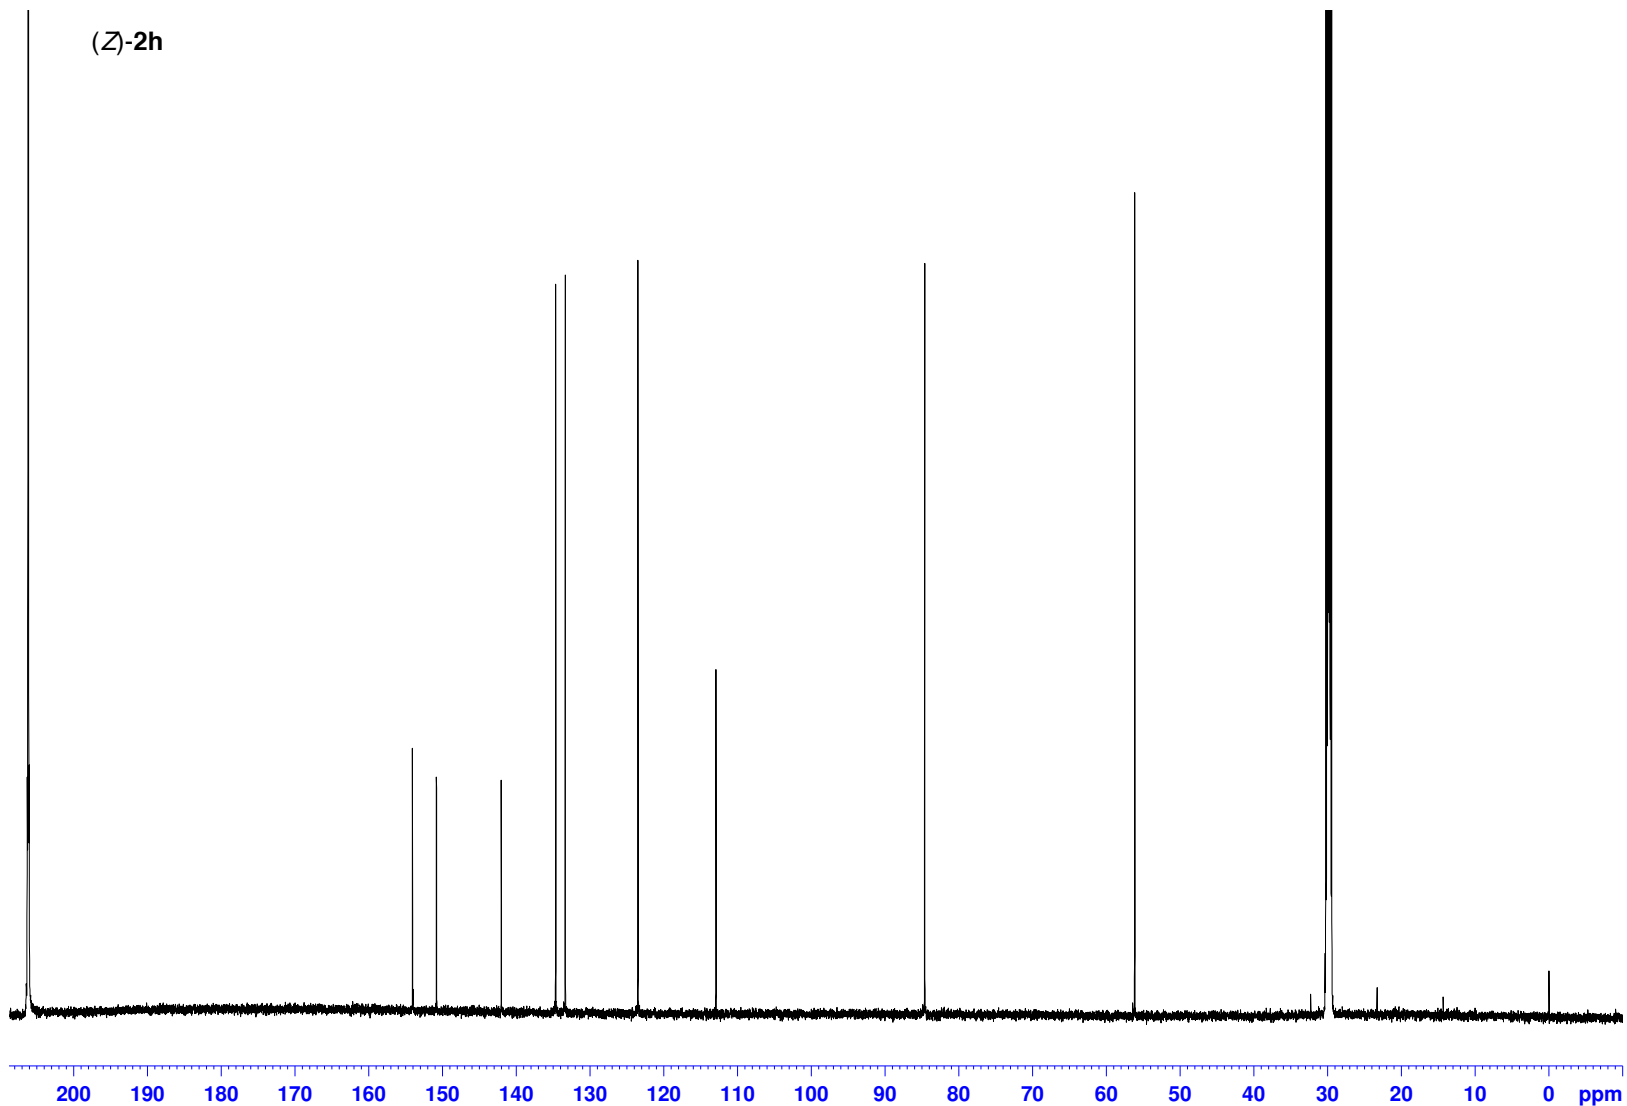

Current Data Parameters  
 NAME rs3-148-1  
 EXPNO 31  
 PROCNO 1

F2 - Acquisition Parameters  
 Date\_ 20150401  
 Time\_ 4.28  
 INSTRUM spect  
 PROBHD 5 mm CPPBBO BB  
 PULPROG zgpg30  
 TD 65536  
 SOLVENT Acetic  
 NS 1024  
 DS 4  
 SWH 36057.691 Hz  
 FIDRES 0.550197 Hz  
 AQ 0.9087659 sec  
 RG 175.56  
 DW 13.867 use  
 DE 18.00 use  
 TE 300.0 K  
 D1 2.0000000 sec  
 D11 0.0300000 sec  
 TD0 1

==== CHANNEL f1 =====  
 SFO1 150.9178981 MHz  
 NUC1 13C  
 P1 10.00 use  
 PLW1 70.0000000 W

==== CHANNEL f2 =====  
 SFO2 600.1324005 MHz  
 NUC2 1H  
 CPDPRG[2] waltz16  
 PCPD2 70.00 use  
 PLW2 26.0000000 W  
 PLW12 0.76407999 W  
 PLW13 0.37439999 W

F2 - Processing parameters  
 SI 32768  
 SF 150.9026714 MHz  
 WDW EM  
 SSB 0  
 LB 1.00 Hz  
 GB 0  
 PC 1.40



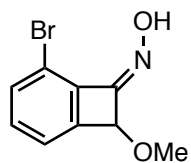

(E)-2h



Current Data Parameters  
 NAME rs3-148-3  
 EXPNO 10  
 PROCNO 1

F2 - Acquisition Parameters  
 Date\_ 20150216  
 Time\_ 19.53  
 INSTRUM spect  
 PROBHD 5 mm CPPBBO BB  
 PULPROG zg30  
 TD 65536  
 SOLVENT Acetone  
 NS 16  
 DS 2  
 SWH 12019.230 Hz  
 FIDRES 0.183399 Hz  
 AQ 2.7262976 sec  
 RG 31.94  
 DW 41.600 use  
 DE 10.00 use  
 TE 300.0 K  
 D1 1.00000000 sec  
 TD0 1

==== CHANNEL f1 =====  
 SFO1 600.1337060 MHz  
 NUC1 1H  
 P1 12.00 use  
 PLW1 23.00000000 W

F2 - Processing parameters  
 SI 65536  
 SF 600.1300108 MHz  
 WDW EM  
 SSB 0  
 LB 0.30 Hz  
 GB 0  
 PC 1.00

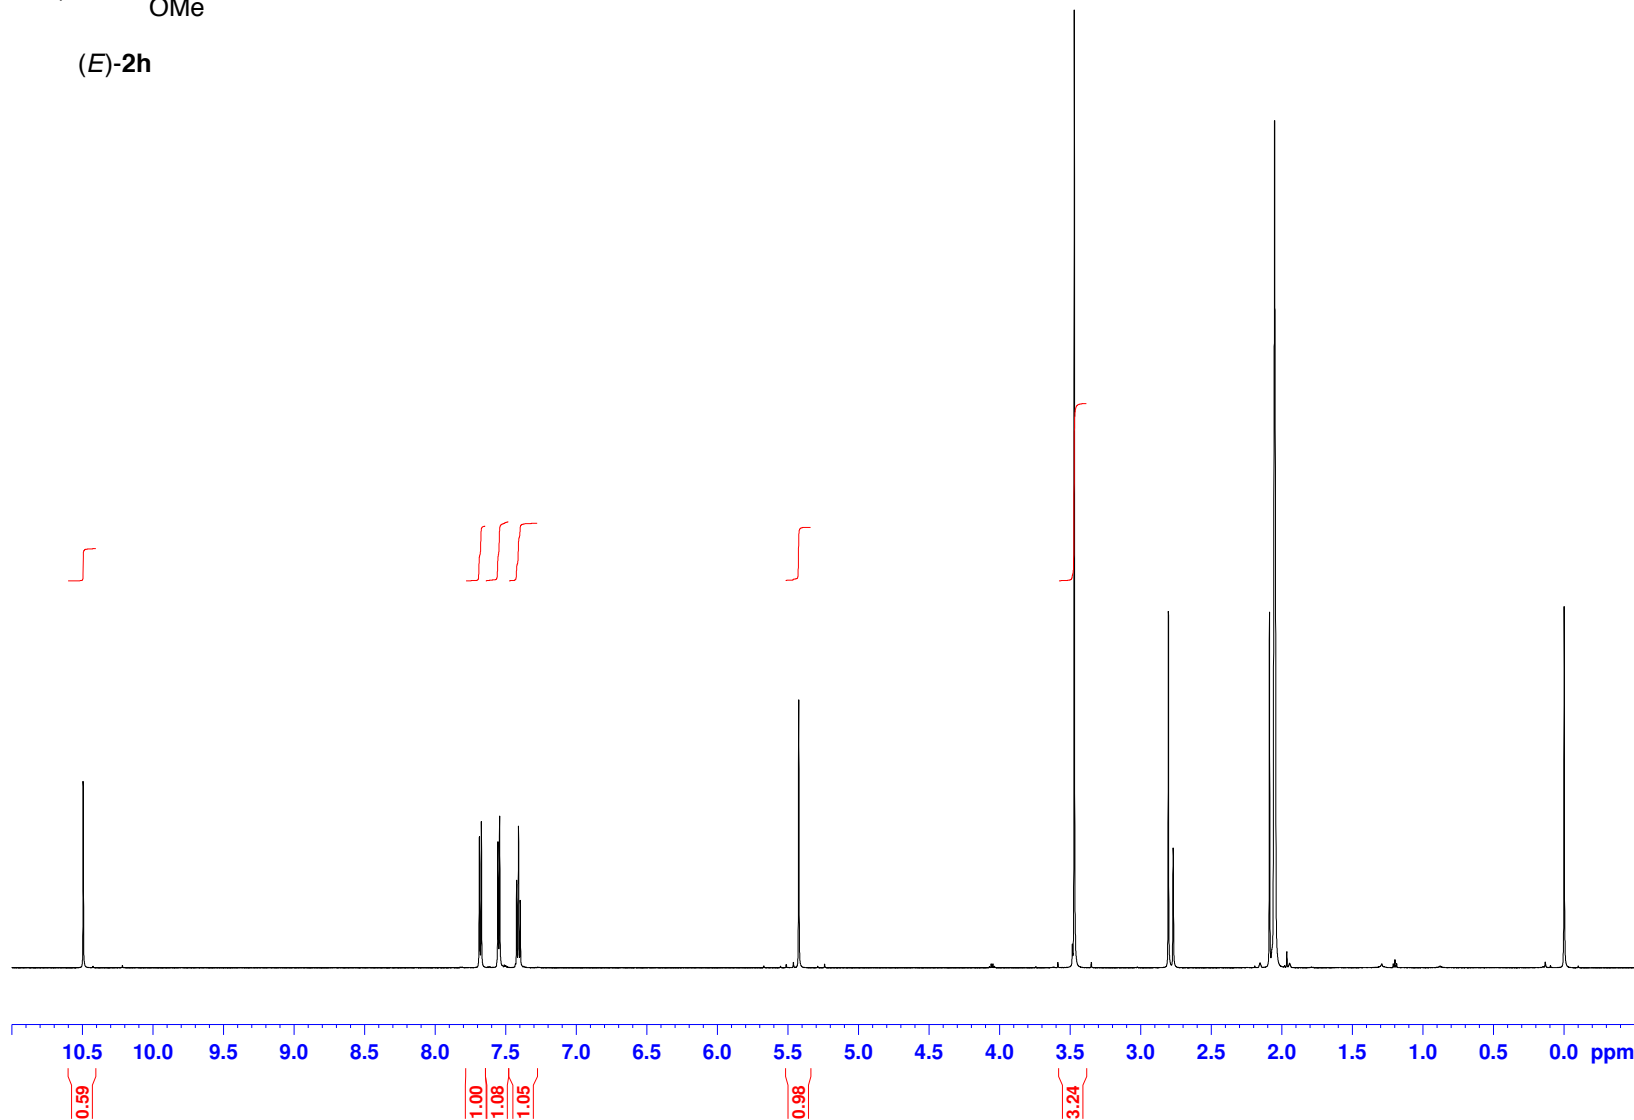

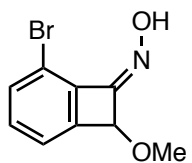

(E)-2h

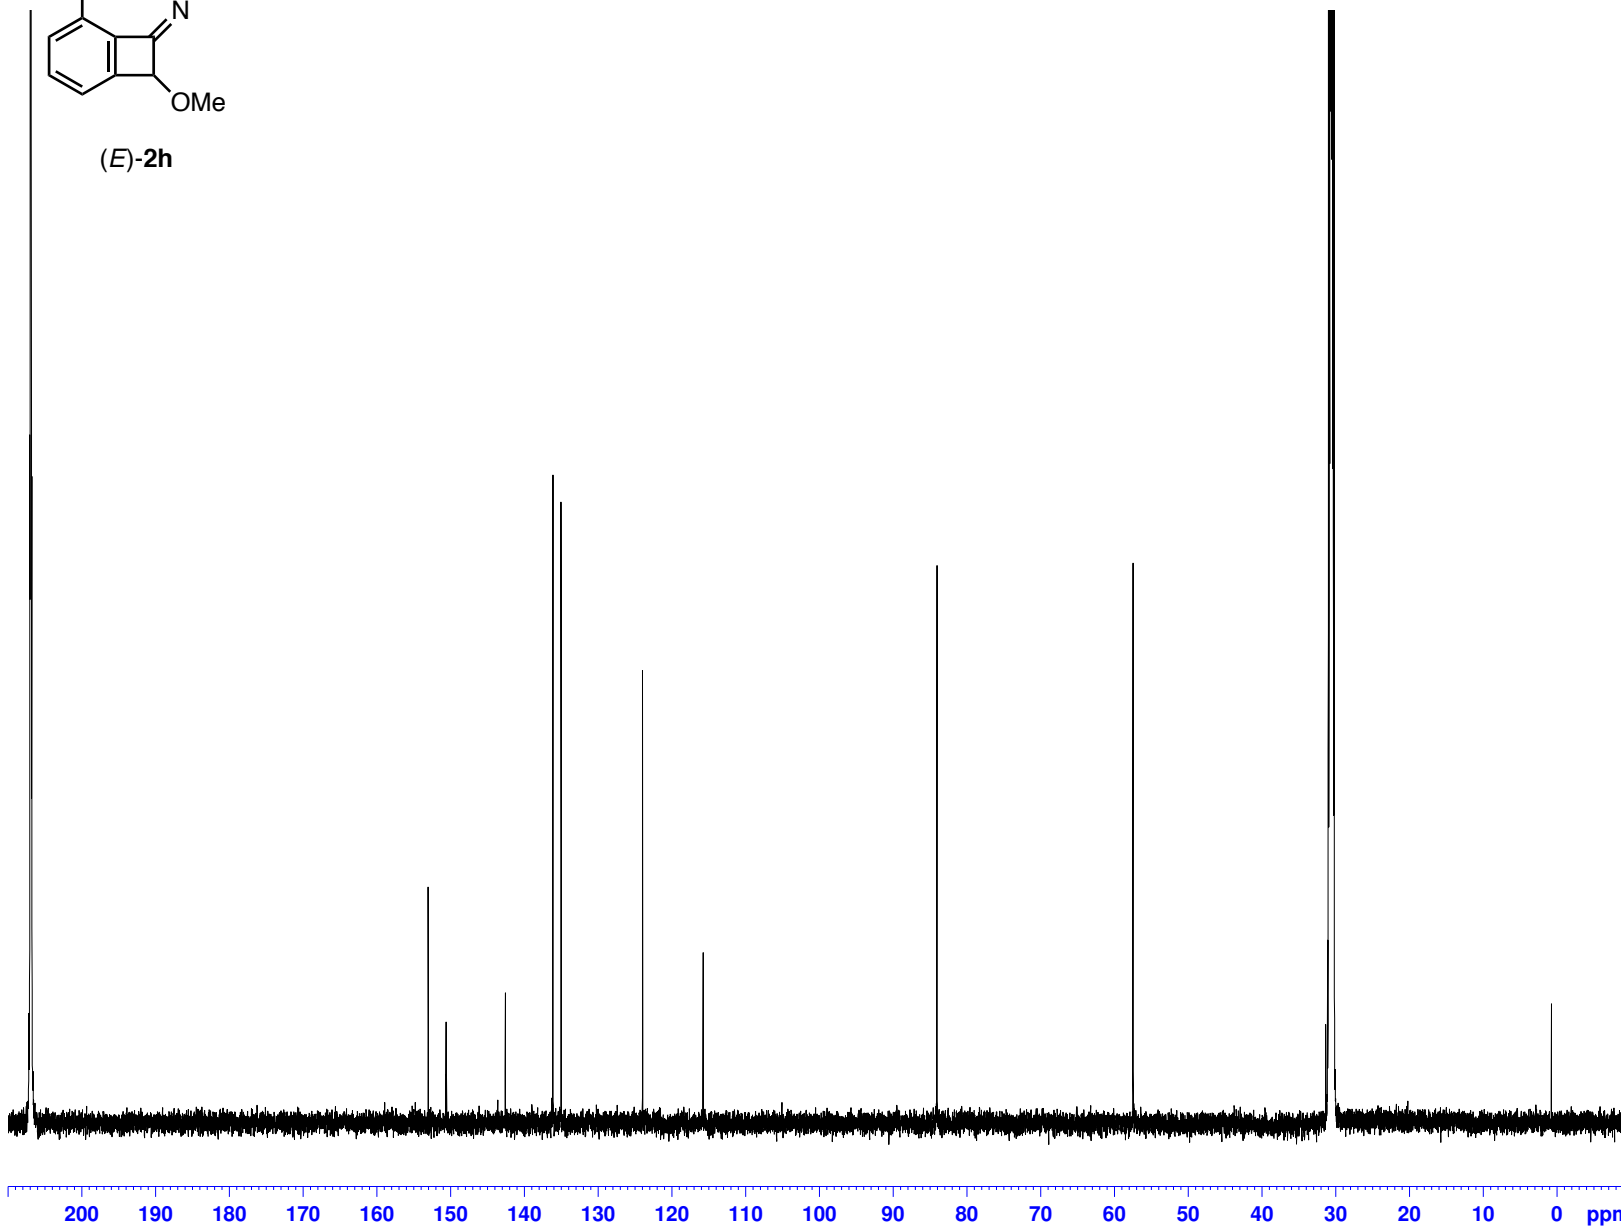

Current Data Parameters  
 NAME rs3-148-3  
 EXPNO 11  
 PROCNO 1

F2 - Acquisition Parameters  
 Date\_ 20150217  
 Time\_ 6.00  
 INSTRUM spect  
 PROBHD 5 mm CPPBBO BB  
 PULPROG zgpg30  
 TD 65536  
 SOLVENT Acetone  
 NS 1024  
 DS 4  
 SWH 36057.691 Hz  
 FIDRES 0.550197 Hz  
 AQ 0.9087659 sec  
 RG 175.56  
 DW 13.867 use  
 DE 18.00 use  
 TE 300.0 K  
 D1 2.0000000 sec  
 D11 0.0300000 sec  
 TD0 1

==== CHANNEL f1 =====  
 SFO1 150.9178981 MHz  
 NUC1 13C  
 P1 10.00 use  
 PLW1 70.0000000 W

==== CHANNEL f2 =====  
 SFO2 600.1324005 MHz  
 NUC2 1H  
 CPDPRG[2] waltz16  
 PCPD2 70.00 use  
 PLW2 26.0000000 W  
 PLW12 0.76407999 W  
 PLW13 0.37439999 W

F2 - Processing parameters  
 SI 32768  
 SF 150.9025576 MHz  
 WDW EM  
 SSB 0  
 LB 1.00 Hz  
 GB 0  
 PC 1.40

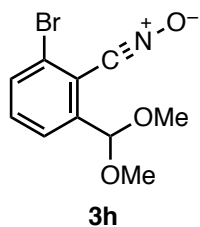

Current Data Parameters  
 NAME Br nitori  
 EXPNO 10  
 PROCNO 1

F2 - Acquisition Parameters  
 Date\_ 20170222  
 Time\_ 15.00  
 INSTRUM spect  
 PROBHD 5 mm PABBO BB/  
 PULPROG zg30  
 TD 65536  
 SOLVENT CDC13  
 NS 16  
 DS 2  
 SWH 12019.230 Hz  
 FIDRES 0.183399 Hz  
 AQ 2.7262976 sec  
 RG 87.68  
 DW 41.600 use  
 DE 6.50 use  
 TE 298.0 K  
 D1 1.0000000 sec  
 TD0 1

==== CHANNEL f1 =====  
 SFO1 600.1337060 MHz  
 NUC1 1H  
 P1 12.00 use  
 PLW1 22.0000000 W

F2 - Processing parameters  
 SI 65536  
 SF 600.1300162 MHz  
 WDW EM  
 SSB 0  
 LB 0.30 Hz  
 GB 0  
 PC 1.00

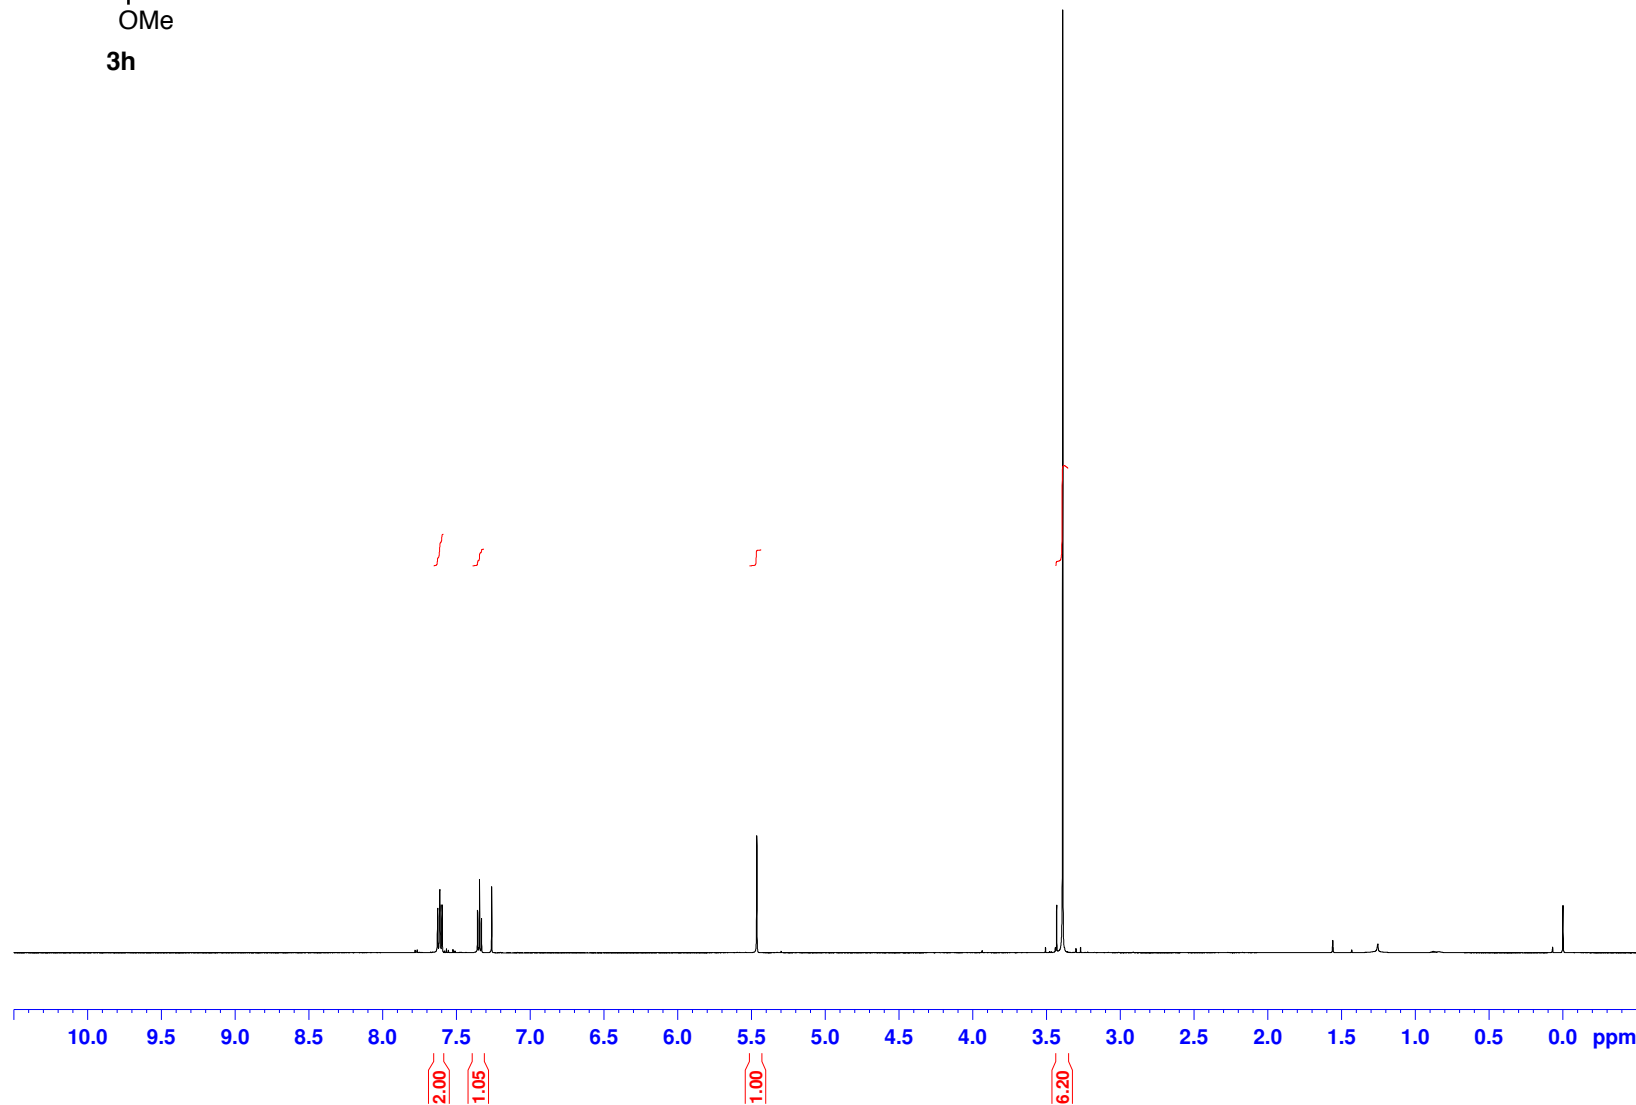

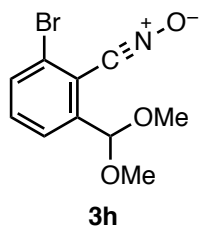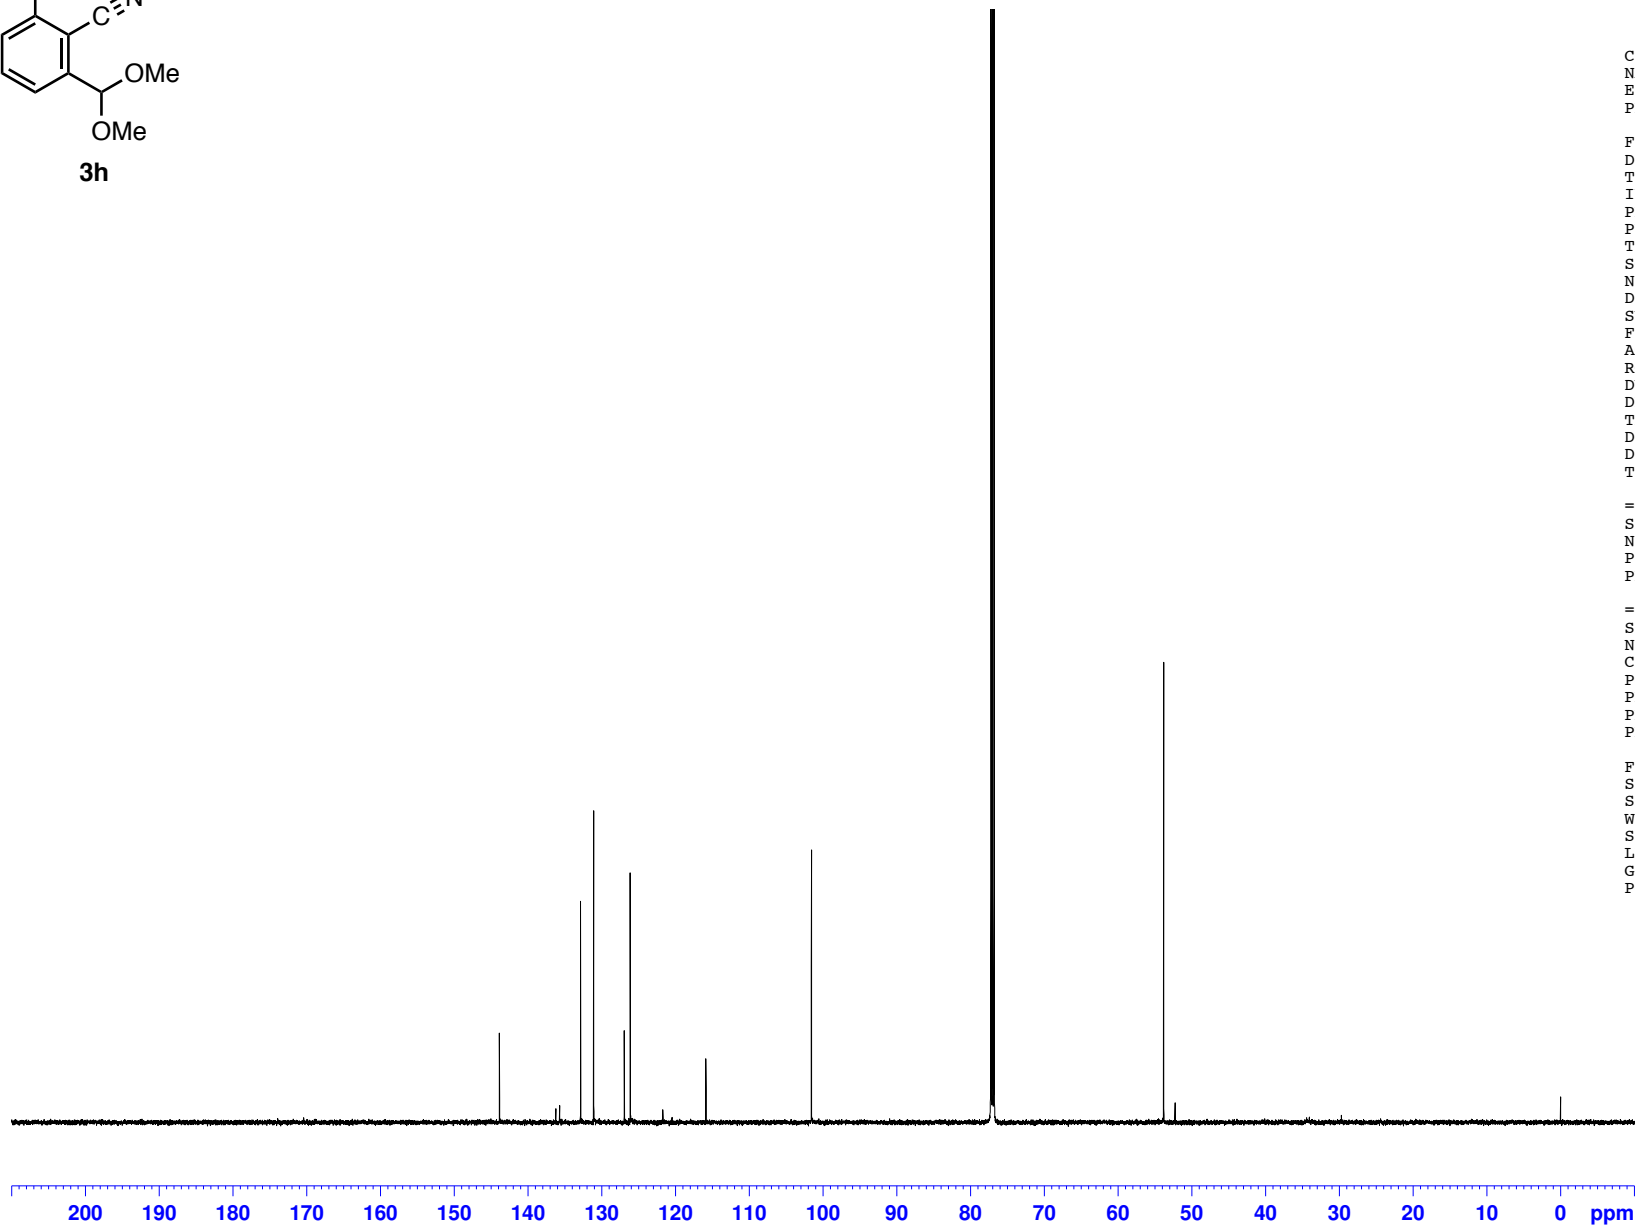

Current Data Parameters  
 NAME Br nitori  
 EXPNO 20  
 PROCNO 1

F2 - Acquisition Parameters  
 Date\_ 20170223  
 Time\_ 2.34  
 INSTRUM spect  
 PROBHD 5 mm PABBO BB/  
 PULPROG zgpg30  
 TD 65536  
 SOLVENT CDC13  
 NS 3000  
 DS 4  
 SWH 36057.691 Hz  
 FIDRES 0.550197 Hz  
 AQ 0.9087659 sec  
 RG 175.56  
 DW 13.867 use  
 DE 6.50 use  
 TE 298.0 K  
 D1 2.0000000 sec  
 D11 0.0300000 sec  
 TD0 1

==== CHANNEL f1 =====  
 SFO1 150.9178981 MHz  
 NUC1 13C  
 P1 11.00 use  
 PLW1 93.0000000 W

==== CHANNEL f2 =====  
 SFO2 600.1324005 MHz  
 NUC2 1H  
 CPDPRG[2] waltz16  
 PCPD2 70.00 use  
 PLW2 22.0000000 W  
 PLW12 0.64652997 W  
 PLW13 0.31680000 W

F2 - Processing parameters  
 SI 32768  
 SF 150.9028089 MHz  
 WDW EM  
 SSB 0  
 LB 1.00 Hz  
 GB 0  
 PC 1.40

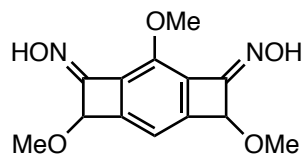

2i



Current Data Parameters  
 NAME dioxime  
 EXPNO 70  
 PROCNO 1

F2 - Acquisition Parameters  
 Date\_ 20170222  
 Time\_ 23.54  
 INSTRUM spect  
 PROBHD 5 mm PABBO BB/  
 PULPROG zg30  
 TD 65536  
 SOLVENT Acetone  
 NS 16  
 DS 2  
 SWH 12019.230 Hz  
 FIDRES 0.183399 Hz  
 AQ 2.7262976 sec  
 RG 87.68  
 DW 41.600 use  
 DE 6.50 use  
 TE 298.0 K  
 D1 1.00000000 sec  
 TD0 1

==== CHANNEL f1 =====  
 SFO1 600.1337060 MHz  
 NUC1 1H  
 P1 12.00 use  
 PLW1 22.00000000 W

F2 - Processing parameters  
 SI 65536  
 SF 600.1300108 MHz  
 WDW EM  
 SSB 0  
 LB 0.30 Hz  
 GB 0  
 PC 1.00

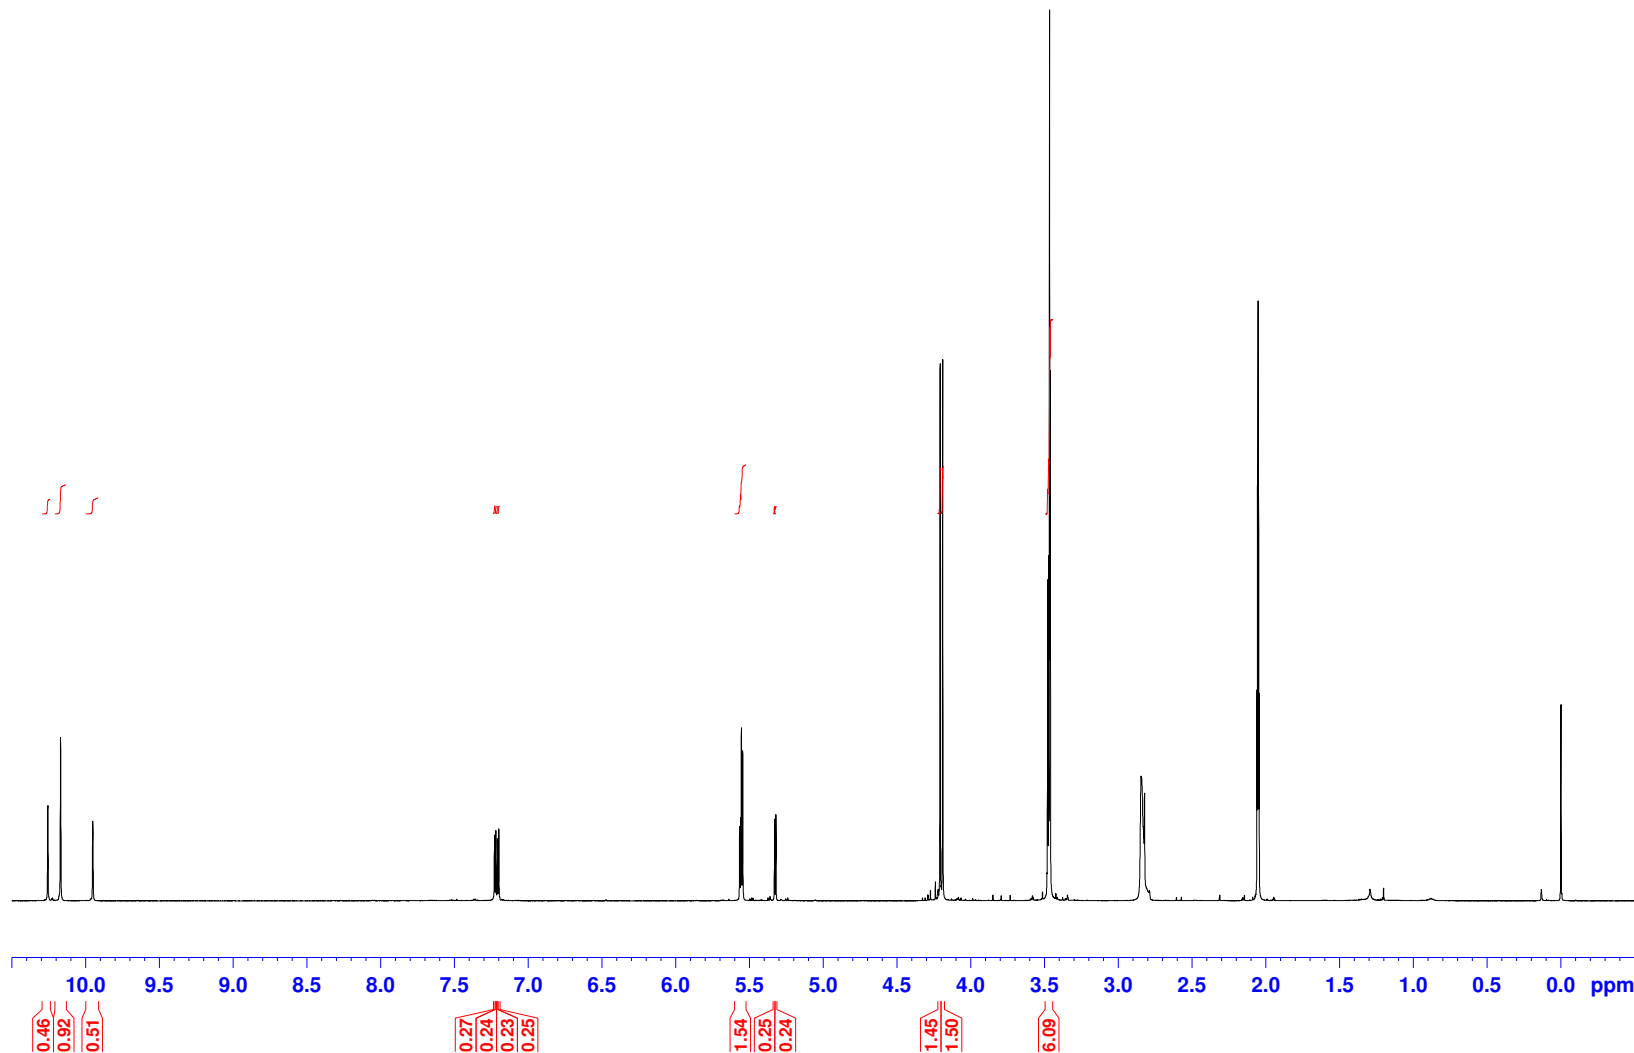

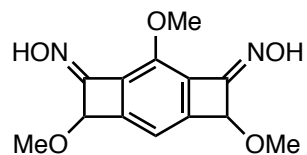

2i

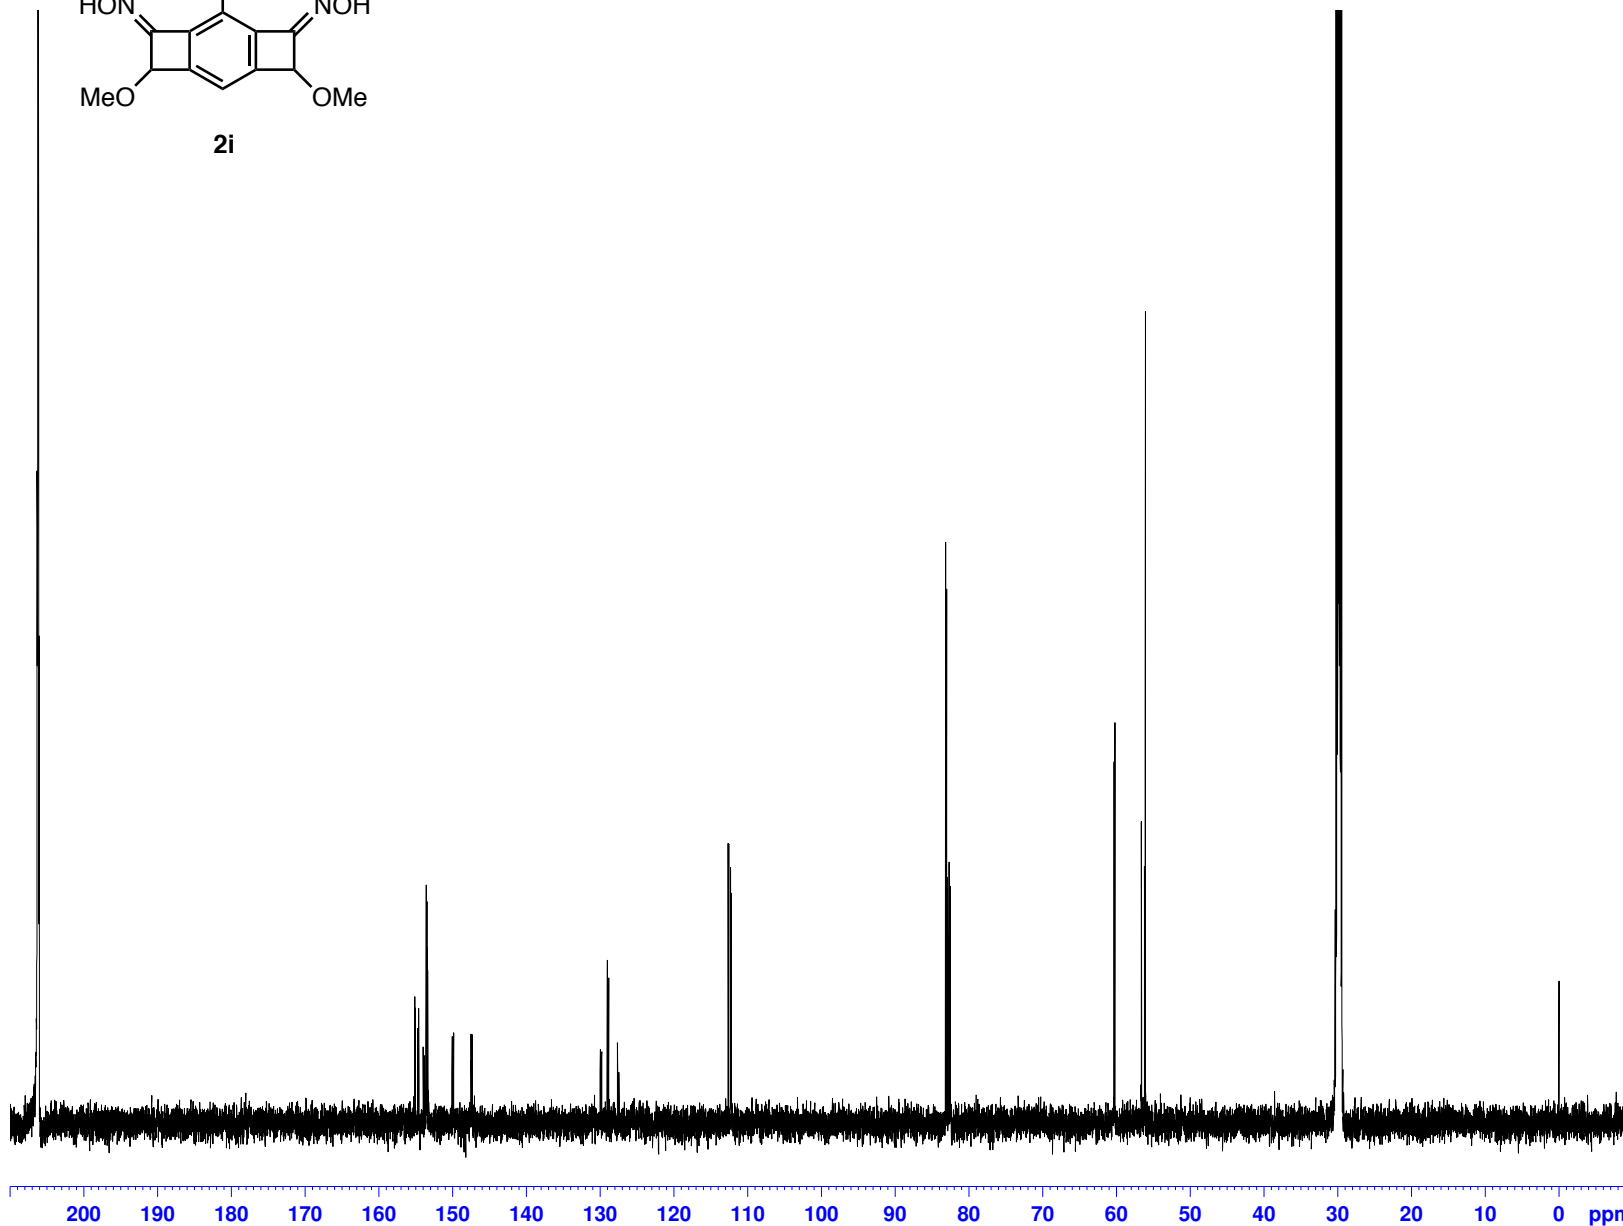

Current Data Parameters  
NAME dioxime  
EXPNO 71  
PROCNO 1

F2 - Acquisition Parameters  
Date\_ 20170223  
Time\_ 7.40  
INSTRUM spect  
PROBHD 5 mm PABBO BB/  
PULPROG zgpg30  
TD 65536  
SOLVENT Acetone  
NS 3000  
DS 4  
SWH 36057.691 Hz  
FIDRES 0.550197 Hz  
AQ 0.9087659 sec  
RG 175.56  
DW 13.867 use  
DE 6.50 use  
TE 298.0 K  
D1 2.0000000 sec  
D11 0.0300000 sec  
TD0 1

==== CHANNEL f1 =====  
SFO1 150.9178981 MHz  
NUC1 13C  
P1 11.00 use  
PLW1 93.0000000 W

==== CHANNEL f2 =====  
SFO2 600.1324005 MHz  
NUC2 1H  
CPDPRG[2] waltz16  
PCPD2 70.00 use  
PLW2 22.0000000 W  
PLW12 0.64652997 W  
PLW13 0.31680000 W

F2 - Processing parameters  
SI 32768  
SF 150.9026725 MHz  
WDW EM  
SSB 0  
LB 1.00 Hz  
GB 0  
PC 1.40

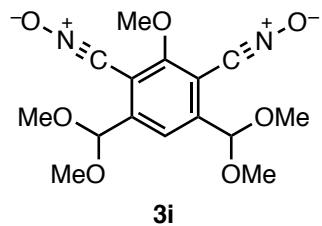

Current Data Parameters  
 NAME dinitori  
 EXPNO 60  
 PROCNO 1

F2 - Acquisition Parameters  
 Date\_ 20170308  
 Time\_ 16.05  
 INSTRUM spect  
 PROBHD 5 mm PABBO BB/  
 PULPROG zg30  
 TD 65536  
 SOLVENT CDC13  
 NS 16  
 DS 2  
 SWH 12019.230 Hz  
 FIDRES 0.183399 Hz  
 AQ 2.7262976 sec  
 RG 75.66  
 DW 41.600 use  
 DE 6.50 use  
 TE 298.0 K  
 D1 1.0000000 sec  
 TD0 1

==== CHANNEL f1 =====  
 SFO1 600.1337060 MHz  
 NUC1 1H  
 P1 12.00 use  
 PLW1 22.0000000 W

F2 - Processing parameters  
 SI 65536  
 SF 600.1300148 MHz  
 WDW EM  
 SSB 0  
 LB 0.30 Hz  
 GB 0  
 PC 1.00

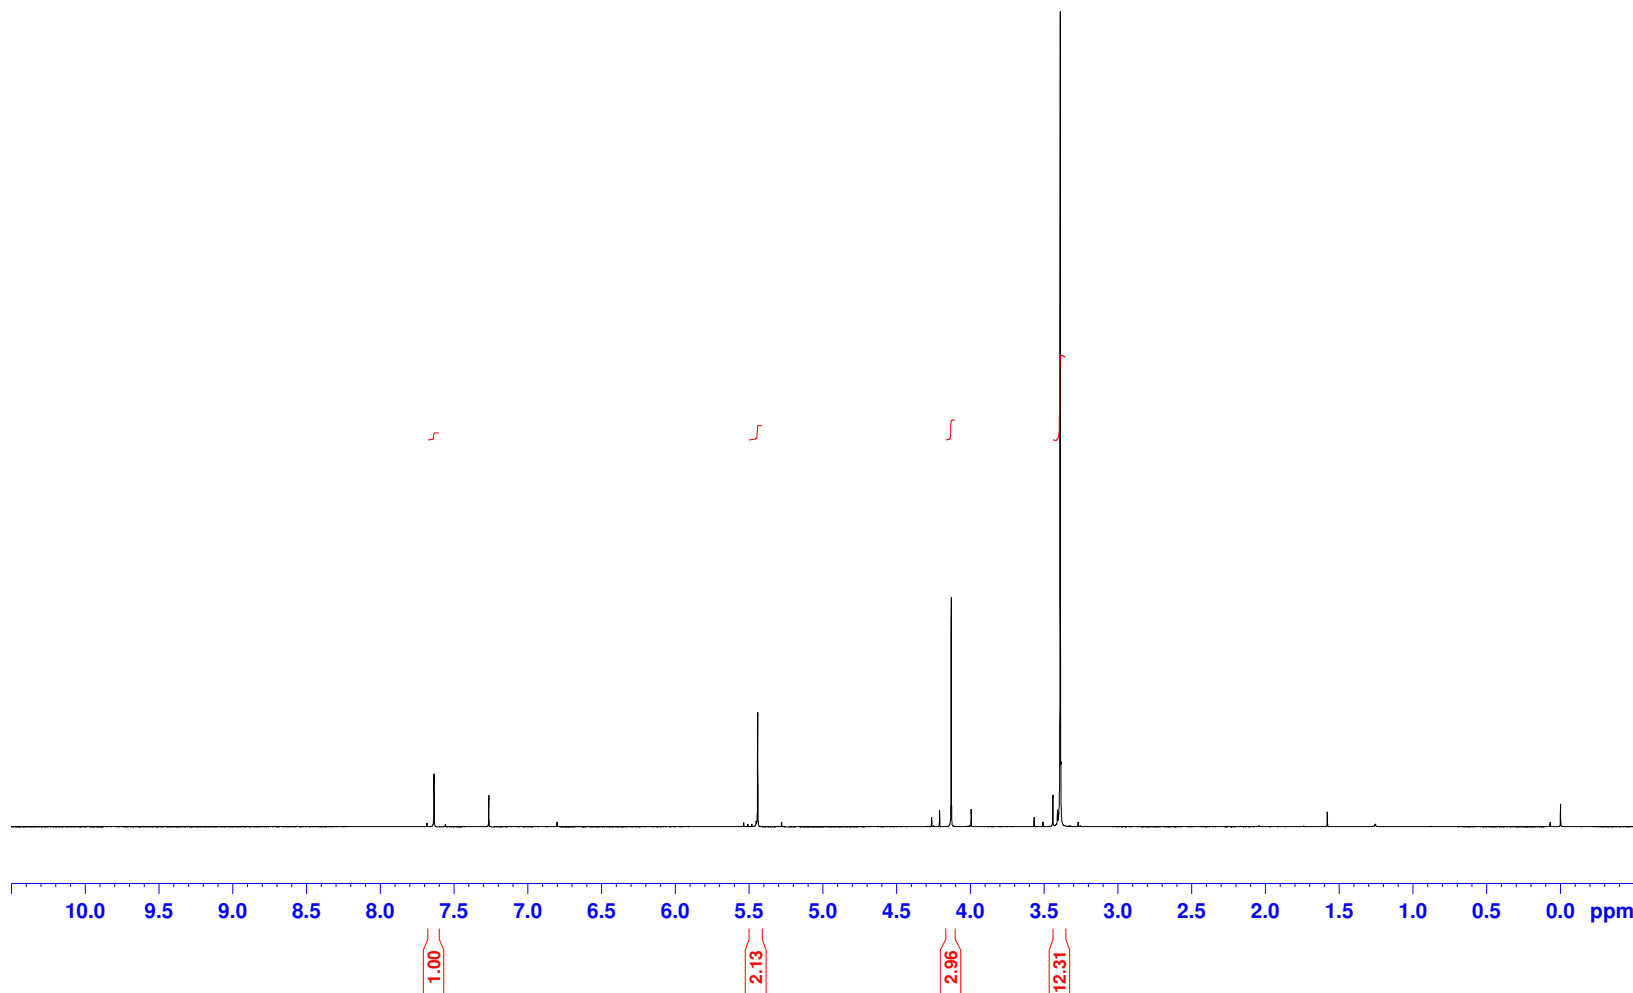



Current Data Parameters  
 NAME dinitori  
 EXPNO 61  
 PROCNO 1

F2 - Acquisition Parameters  
 Date\_ 20170309  
 Time\_ 2.02  
 INSTRUM spect  
 PROBHD 5 mm PABBO BB/  
 PULPROG zgpg30  
 TD 65536  
 SOLVENT CDCl3  
 NS 2400  
 DS 4  
 SWH 36057.691 Hz  
 FIDRES 0.550197 Hz  
 AQ 0.9087659 sec  
 RG 175.56  
 DW 13.867 use  
 DE 6.50 use  
 TE 298.0 K  
 D1 2.0000000 sec  
 D11 0.0300000 sec  
 TD0 1

==== CHANNEL f1 =====  
 SFO1 150.9178981 MHz  
 NUC1 13C  
 P1 11.00 use  
 PLW1 93.0000000 W

==== CHANNEL f2 =====  
 SFO2 600.1324005 MHz  
 NUC2 1H  
 CPDPRG[2] waltz16  
 PCPD2 70.00 use  
 PLW2 22.0000000 W  
 PLW12 0.64652997 W  
 PLW13 0.31680000 W

F2 - Processing parameters  
 SI 32768  
 SF 150.9028080 MHz  
 WDW EM  
 SSB 0  
 LB 1.00 Hz  
 GB 0  
 PC 1.40

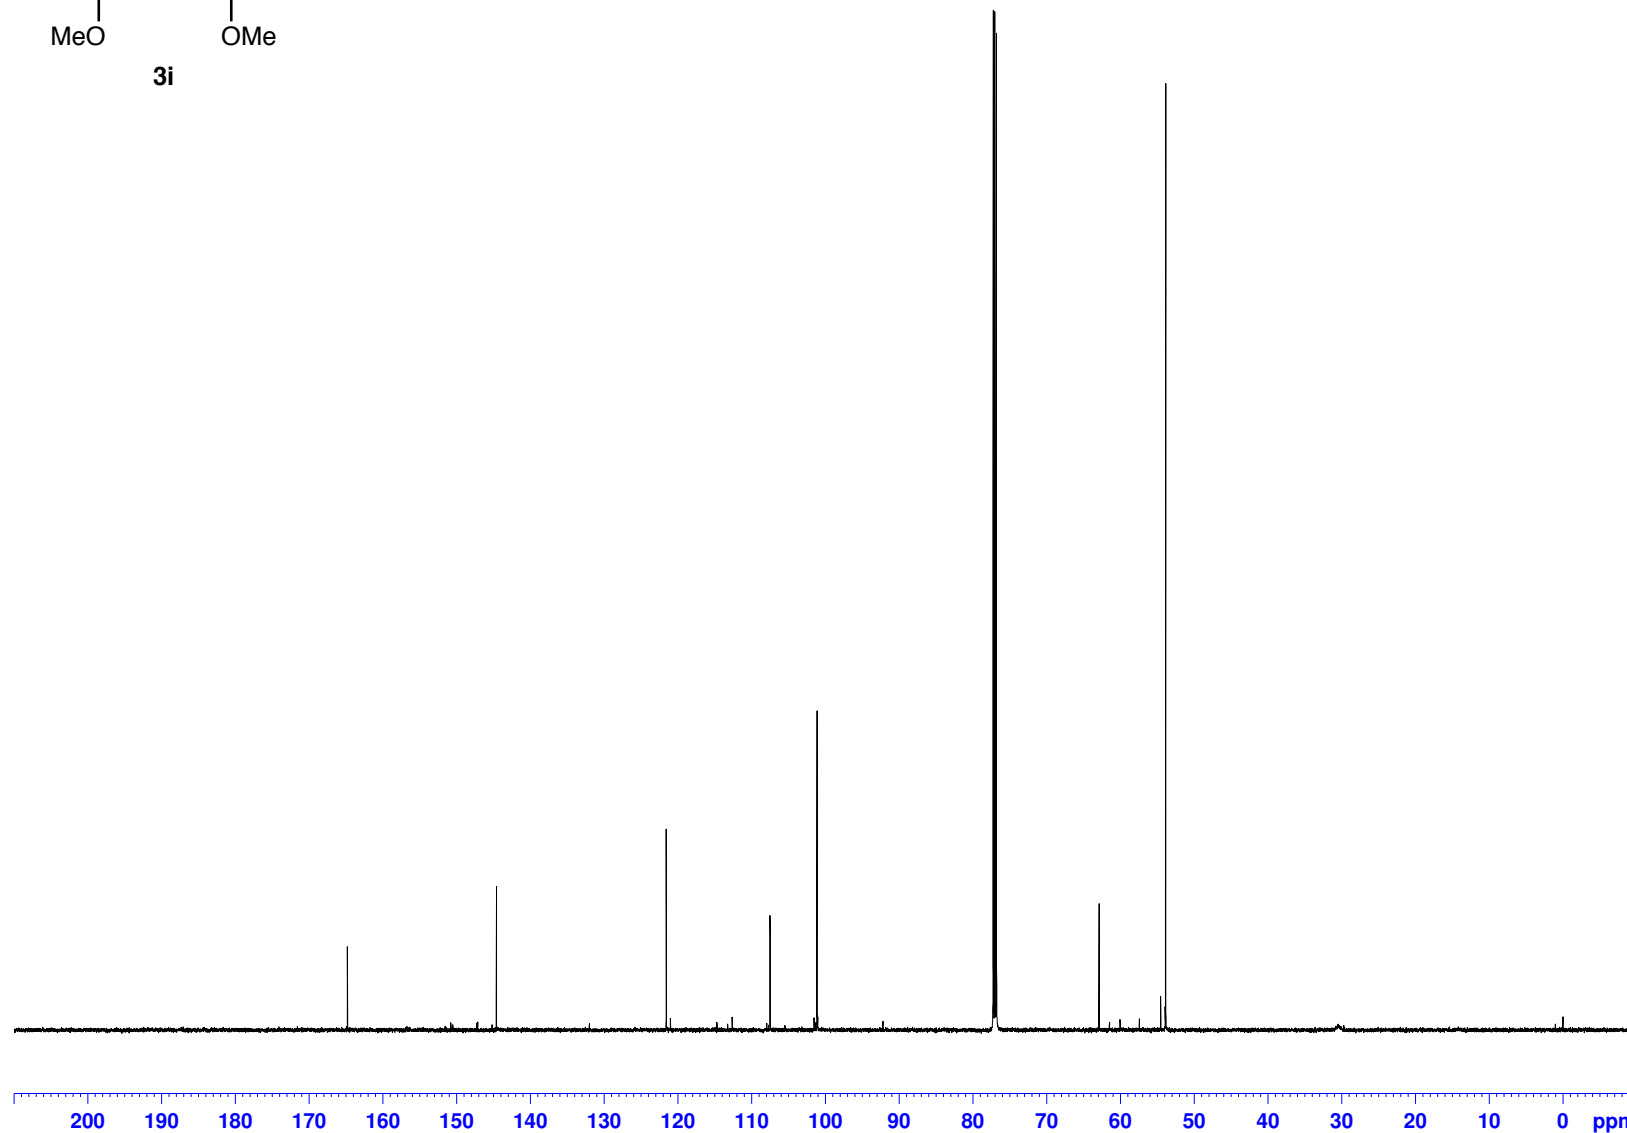



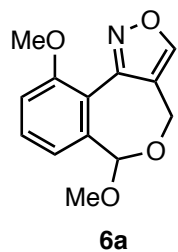

Current Data Parameters  
 NAME 137-1  
 EXPNO 11  
 PROCNO 1

F2 - Acquisition Parameters  
 Date\_ 20150407  
 Time\_ 23.18  
 INSTRUM spect  
 PROBHD 5 mm CPPBBO BB  
 PULPROG zg30  
 TD 65536  
 SOLVENT CDC13  
 NS 16  
 DS 2  
 SWH 12019.230 Hz  
 FIDRES 0.183399 Hz  
 AQ 2.7262976 sec  
 RG 31.94  
 DW 41.600 use  
 DE 10.00 use  
 TE 300.0 K  
 D1 1.0000000 sec  
 TD0 1

==== CHANNEL f1 =====  
 SFO1 600.1337060 MHz  
 NUC1 1H  
 P1 12.00 use  
 PLW1 23.0000000 W

F2 - Processing parameters  
 SI 65536  
 SF 600.1300156 MHz  
 WDW EM  
 SSB 0  
 LB 0.30 Hz  
 GB 0  
 PC 1.00

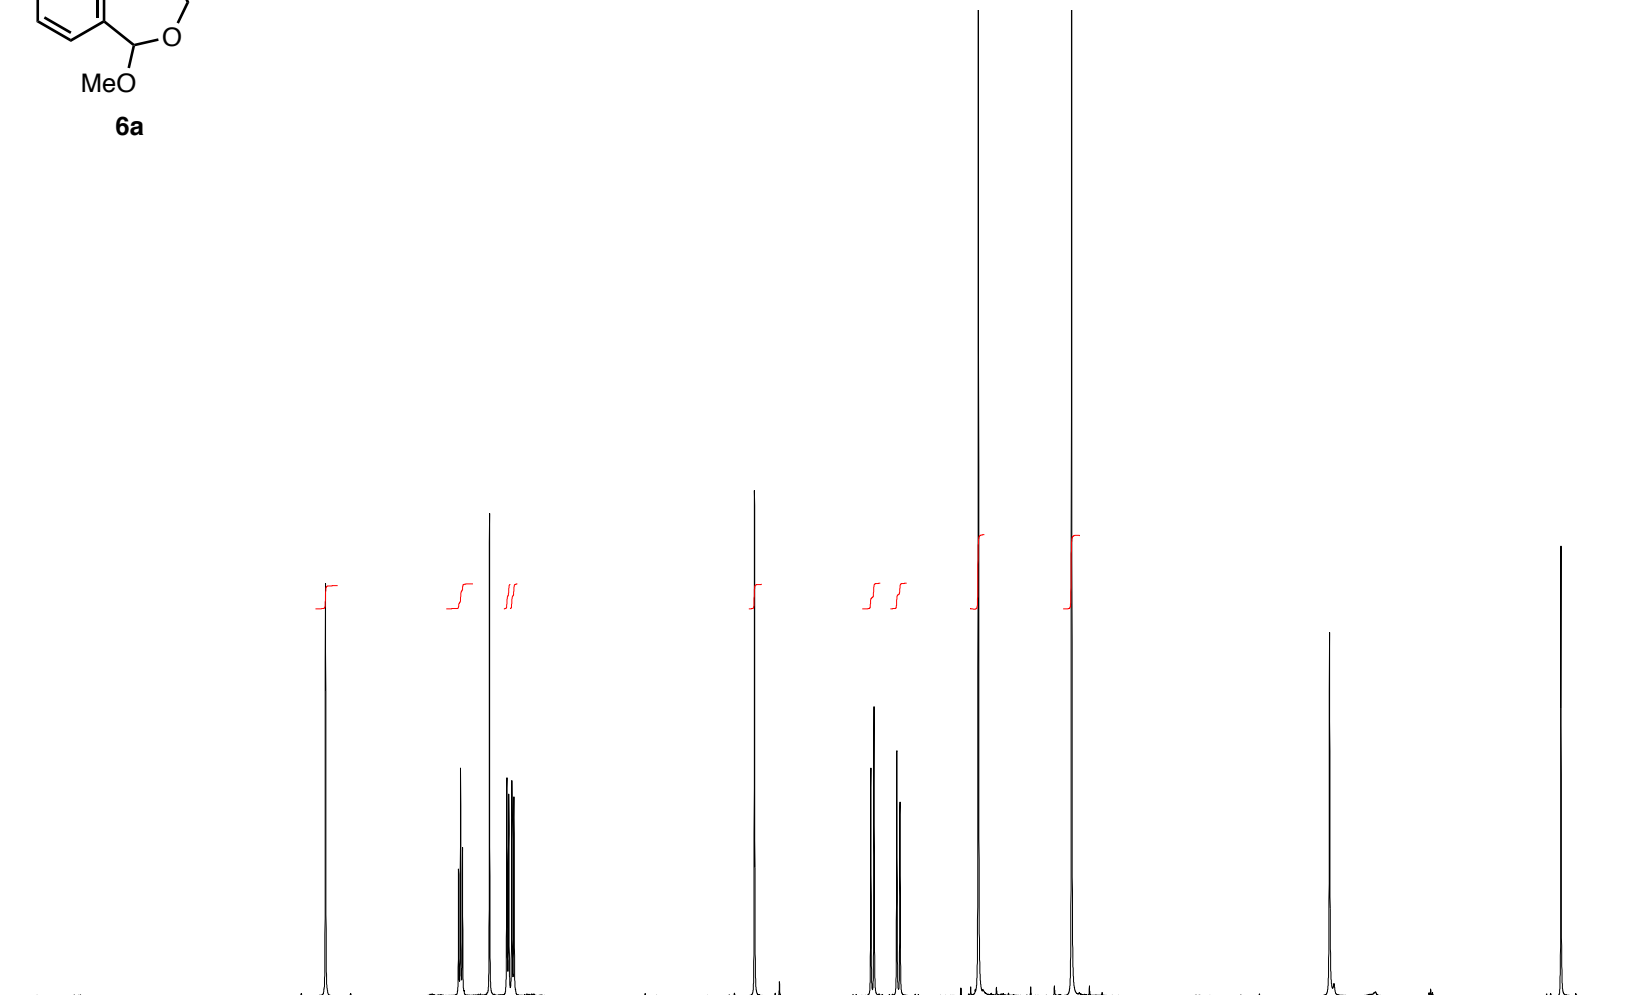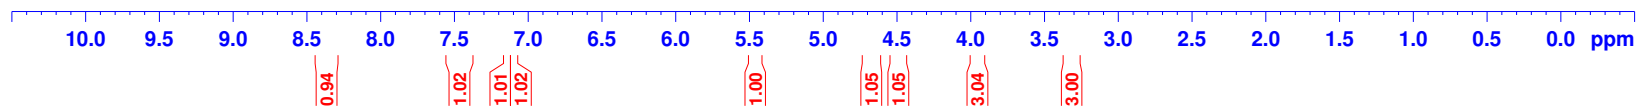

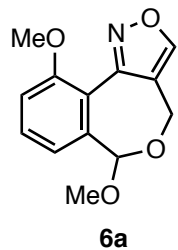

Current Data Parameters  
 NAME 137-1  
 EXPNO 12  
 PROCNO 1

F2 - Acquisition Parameters  
 Date\_ 20150407  
 Time\_ 23.40  
 INSTRUM spect  
 PROBHD 5 mm CPPBBO BB  
 PULPROG zgpg30  
 TD 65536  
 SOLVENT CDC13  
 NS 128  
 DS 4  
 SWH 36057.691 Hz  
 FIDRES 0.550197 Hz  
 AQ 0.9087659 sec  
 RG 175.56  
 DW 13.867 use  
 DE 18.00 use  
 TE 300.0 K  
 D1 2.0000000 sec  
 D11 0.0300000 sec  
 TD0 1

==== CHANNEL f1 =====  
 SFO1 150.9178981 MHz  
 NUC1 13C  
 P1 10.00 use  
 PLW1 70.0000000 W

==== CHANNEL f2 =====  
 SFO2 600.1324005 MHz  
 NUC2 1H  
 CPDPRG[2] waltz16  
 PCPD2 70.00 use  
 PLW2 26.0000000 W  
 PLW12 0.76407999 W  
 PLW13 0.37439999 W

F2 - Processing parameters  
 SI 32768  
 SF 150.9028090 MHz  
 WDW EM  
 SSB 0  
 LB 1.00 Hz  
 GB 0  
 PC 1.40

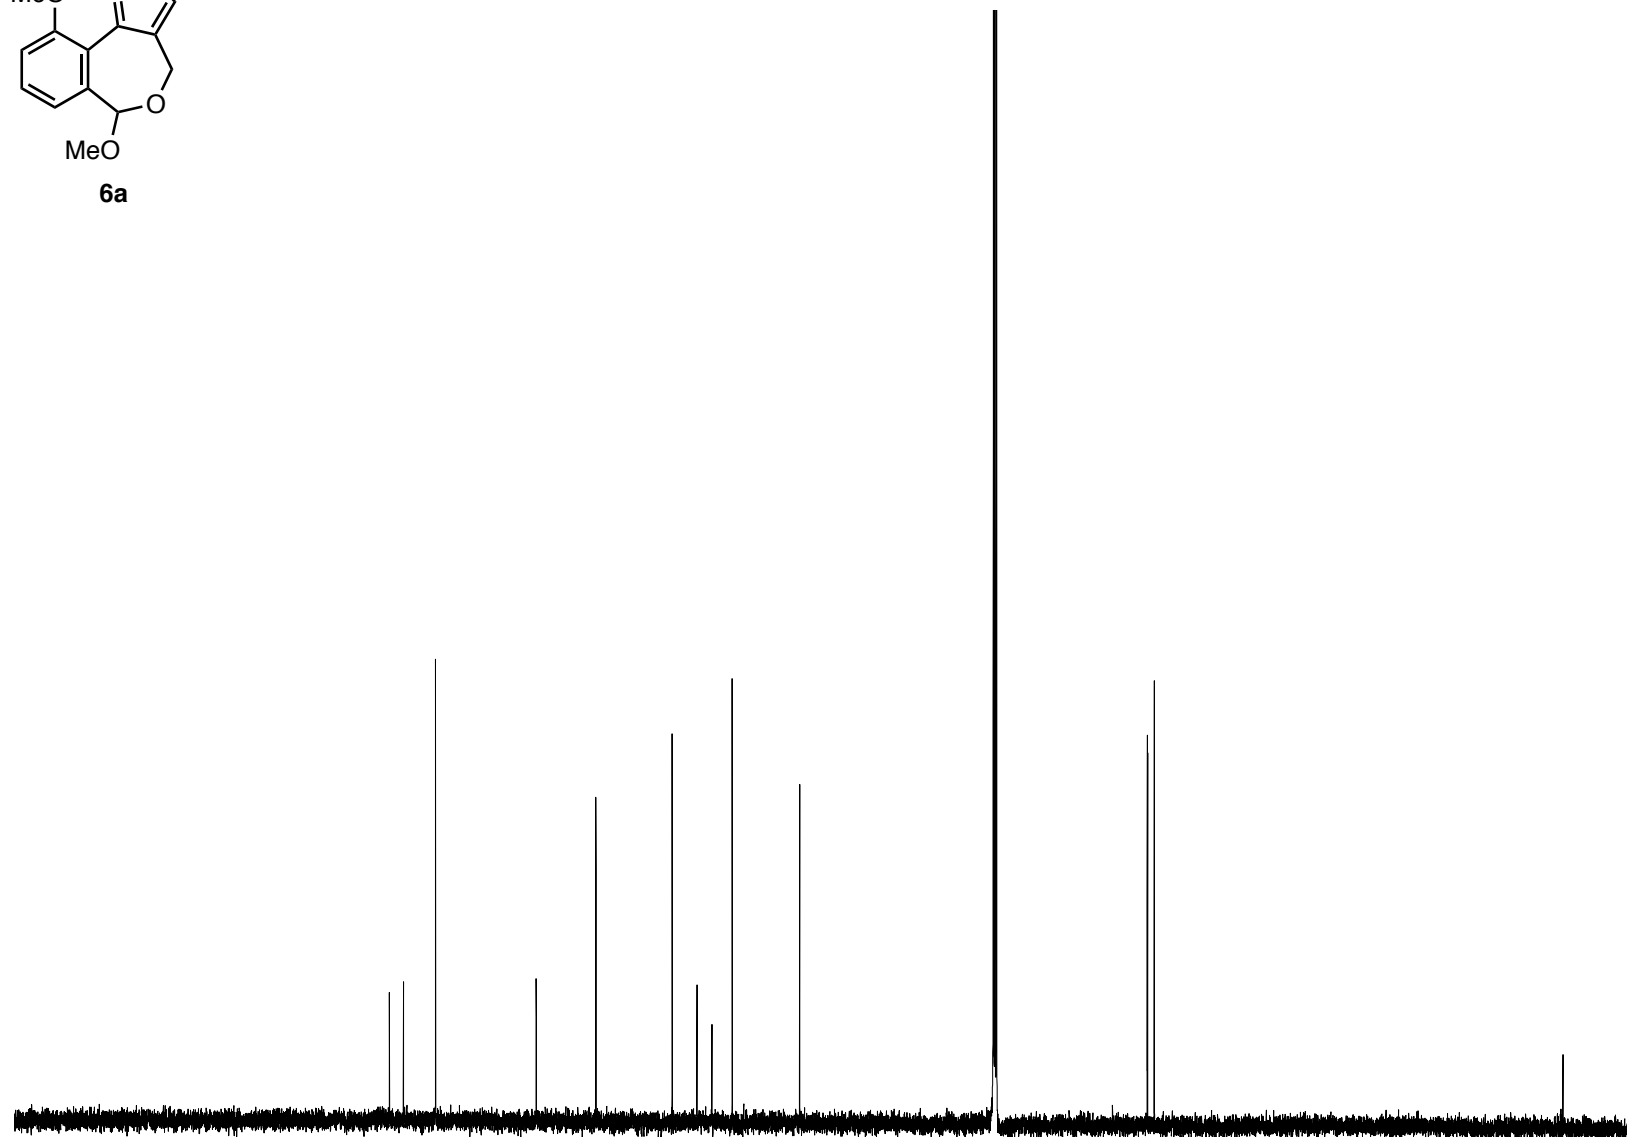

200 190 180 170 160 150 140 130 120 110 100 90 80 70 60 50 40 30 20 10 0 ppm

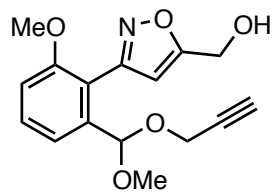

7

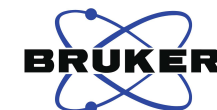

Current Data Parameters  
 NAME iso 1-2  
 EXPNO 10  
 PROCNO 1

F2 - Acquisition Parameters  
 Date\_ 20170304  
 Time 17.12  
 INSTRUM spect  
 PROBHD 5 mm PABBO BB/  
 PULPROG zg30  
 TD 65536  
 SOLVENT CDCl3  
 NS 16  
 DS 2  
 SWH 12019.230 Hz  
 FIDRES 0.183399 Hz  
 AQ 2.7262976 sec  
 RG 83.7  
 DW 41.600 use  
 DE 6.50 use  
 TE 298.0 K  
 D1 1.00000000 sec  
 TD0 1

==== CHANNEL f1 =====  
 SF01 600.1337060 MHz  
 NUC1 1H  
 P1 12.00 use  
 PLW1 22.00000000 W

F2 - Processing parameters  
 SI 65536  
 SF 600.1300168 MHz  
 WDW EM  
 SSB 0  
 LB 0.30 Hz  
 GB 0  
 PC 1.00

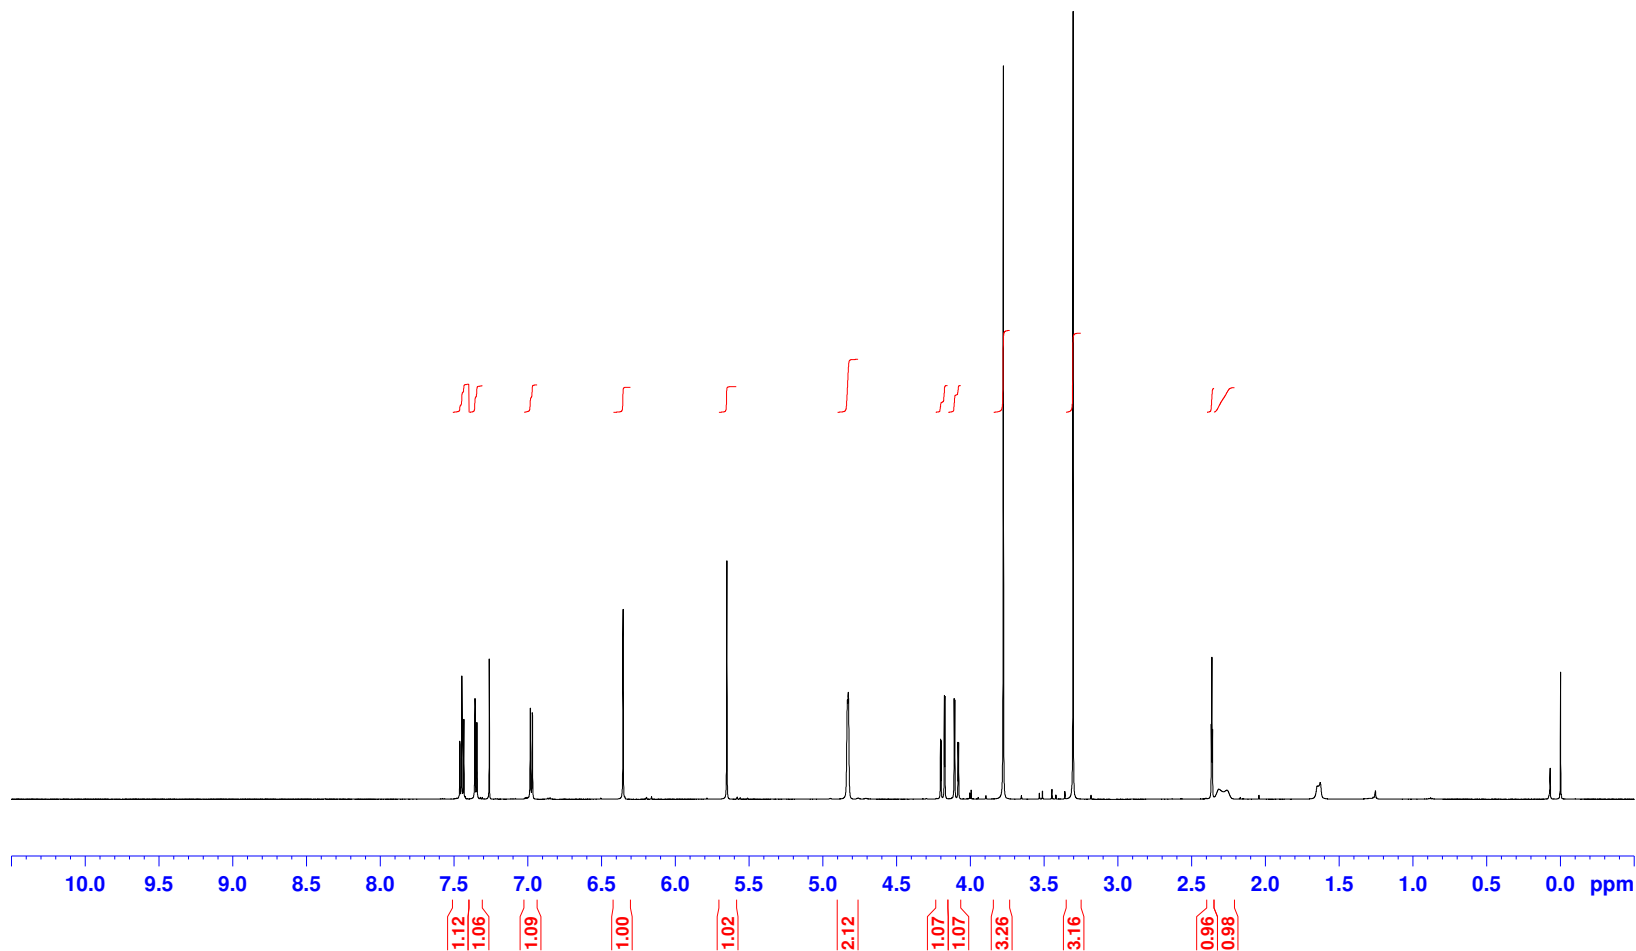



7



Current Data Parameters  
 NAME iso 1-2  
 EXPNO 11  
 PROCNO 1

F2 - Acquisition Parameters  
 Date\_ 20170304  
 Time\_ 17.43  
 INSTRUM spect  
 PROBHD 5 mm PABBO BB/  
 PULPROG zgpg30  
 TD 65536  
 SOLVENT CDC13  
 NS 600  
 DS 4  
 SWH 36057.691 Hz  
 FIDRES 0.550197 Hz  
 AQ 0.9087659 sec  
 RG 175.56  
 DW 13.867 use  
 DE 6.50 use  
 TE 298.0 K  
 D1 2.0000000 sec  
 D11 0.0300000 sec  
 TD0 1

==== CHANNEL f1 =====  
 SFO1 150.9178981 MHz  
 NUC1 13C  
 P1 11.00 use  
 PLW1 93.0000000 W

==== CHANNEL f2 =====  
 SFO2 600.1324005 MHz  
 NUC2 1H  
 CPDPRG[2] waltz16  
 PCPD2 70.00 use  
 PLW2 22.0000000 W  
 PLW12 0.64652997 W  
 PLW13 0.31680000 W

F2 - Processing parameters  
 SI 32768  
 SF 150.9028090 MHz  
 WDW EM  
 SSB 0  
 LB 1.00 Hz  
 GB 0  
 PC 1.40

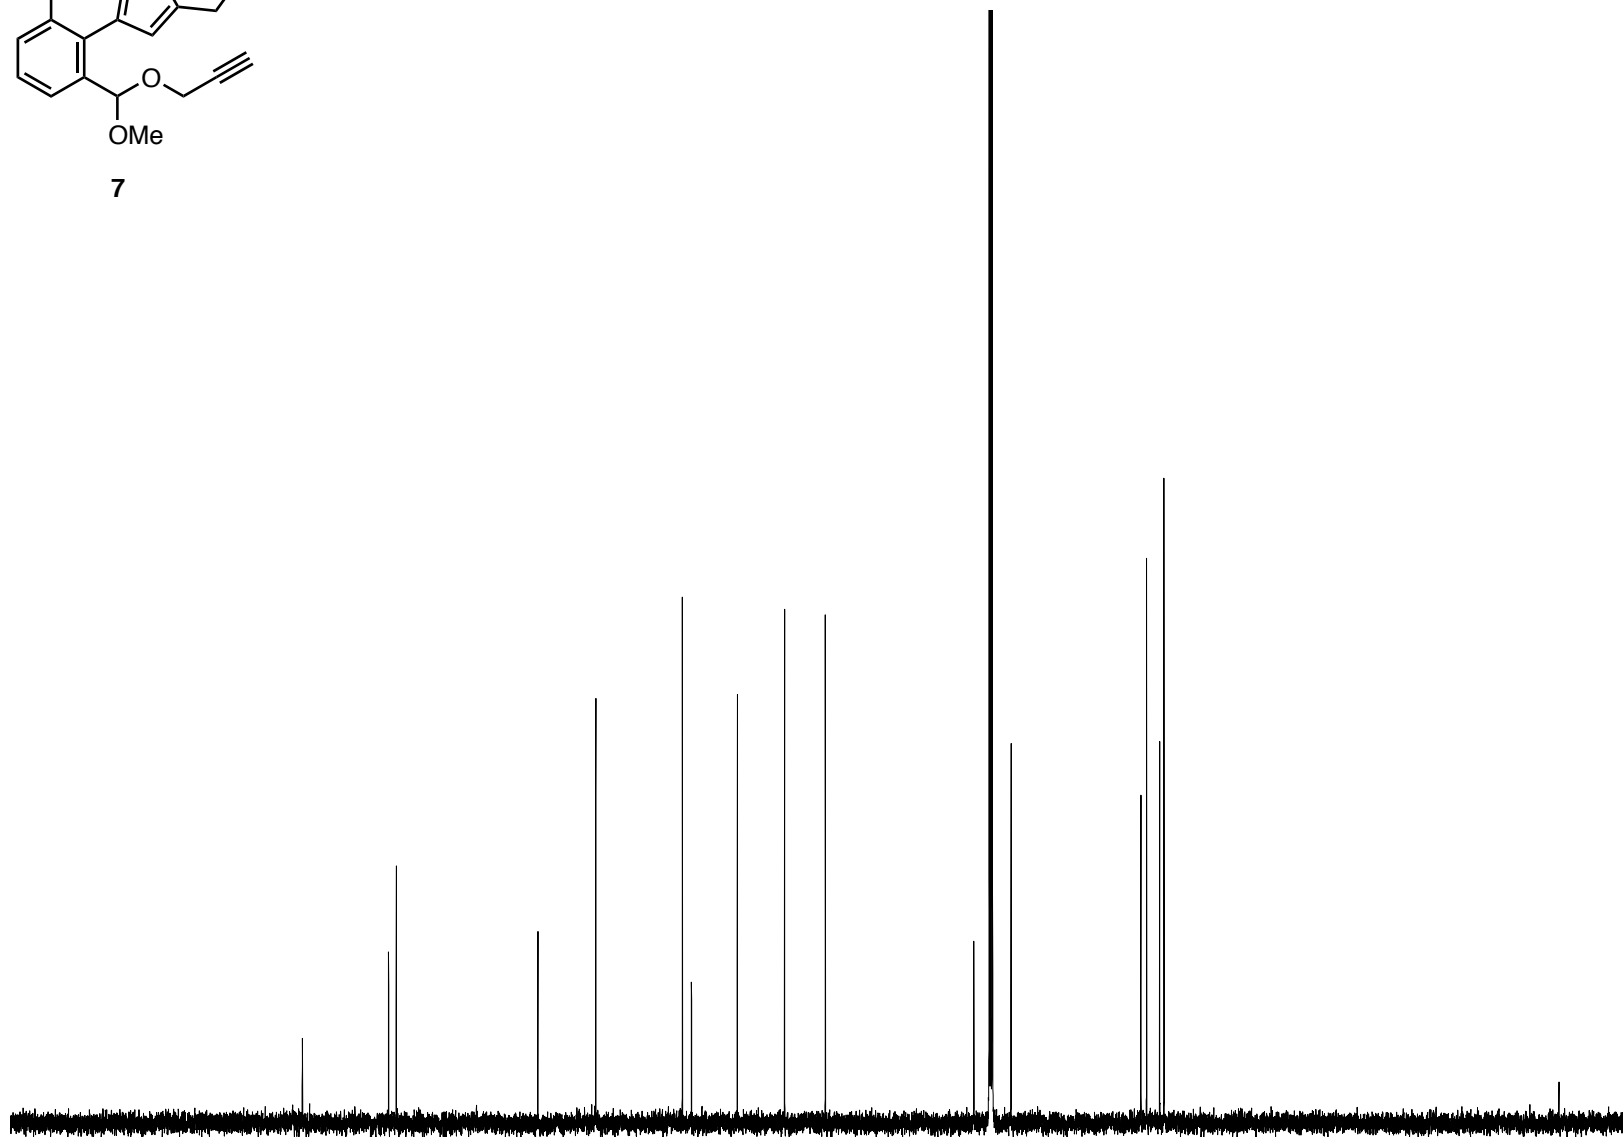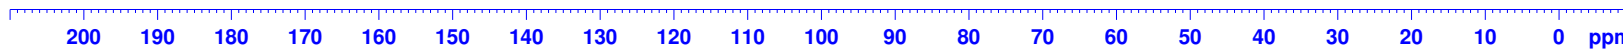

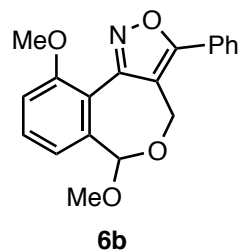

Current Data Parameters  
 NAME rs3-448-1  
 EXPNO 10  
 PROCNO 1

F2 - Acquisition Parameters  
 Date\_ 20161210  
 Time\_ 17.29  
 INSTRUM spect  
 PROBHD 5 mm PABBO BB/  
 PULPROG zg30  
 TD 65536  
 SOLVENT CDC13  
 NS 16  
 DS 2  
 SWH 12019.230 Hz  
 FIDRES 0.183399 Hz  
 AQ 2.7262976 sec  
 RG 99.18  
 DW 41.600 use  
 DE 6.50 use  
 TE 298.0 K  
 D1 1.0000000 sec  
 TD0 1

==== CHANNEL f1 =====  
 SFO1 600.1337060 MHz  
 NUC1 1H  
 P1 12.00 use  
 PLW1 22.0000000 W

F2 - Processing parameters  
 SI 65536  
 SF 600.1300184 MHz  
 WDW EM  
 SSB 0  
 LB 0.30 Hz  
 GB 0  
 PC 1.00

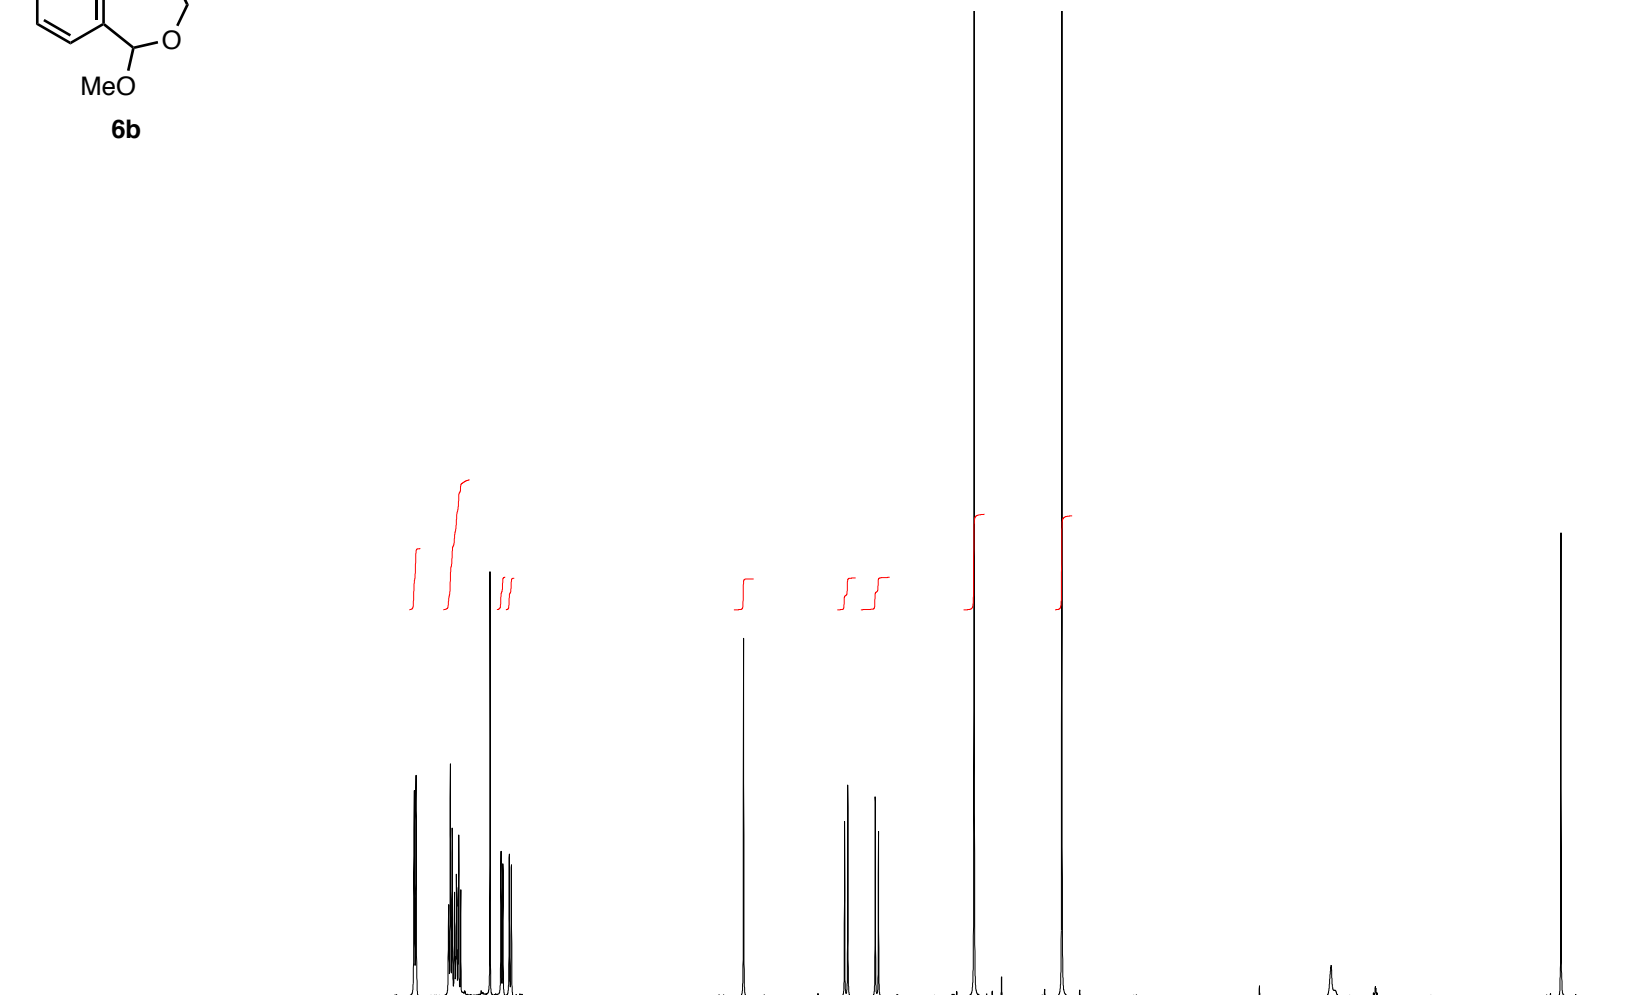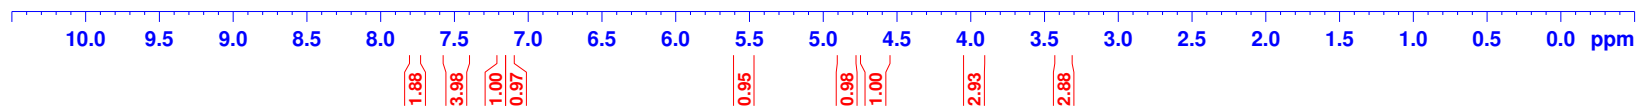

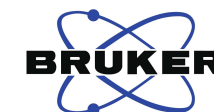

```

Current Data Parameters
NAME          rs3-447-1
EXPNO         10
PROCNO        1

F2 - Acquisition Parameters
Date_         20161214
Time_         7.26
INSTRUM       spect
PROBHD        5 mm PABBO BB/
PULPROG       zgpg30
TD            65536
SOLVENT       CDC13
NS            4096
DS            4
SWH           36057.691 Hz
FIDRES        0.550197 Hz
AQ            0.9087659 sec
RG            175.56
DW            13.867 use
DE            6.50 use
TE            298.0 K
D1            2.0000000 sec
D11           0.0300000 sec
TD0           1

===== CHANNEL f1 =====
SFO1          150.9178981 MHz
NUC1           13C
P1             11.00 use
PLW1           93.0000000 W

===== CHANNEL f2 =====
SFO2          600.1324005 MHz
NUC2           1H
CPDPRG[2]     waltz16
PCPD2         70.00 use
PLW2          22.0000000 W
PLW12         0.64652997 W
PLW13         0.31680000 W

F2 - Processing parameters
SI             32768
SF            150.9028101 MHz
WDW            EM
SSB            0
LB             1.00 Hz
GB            0
PC             1.40

```

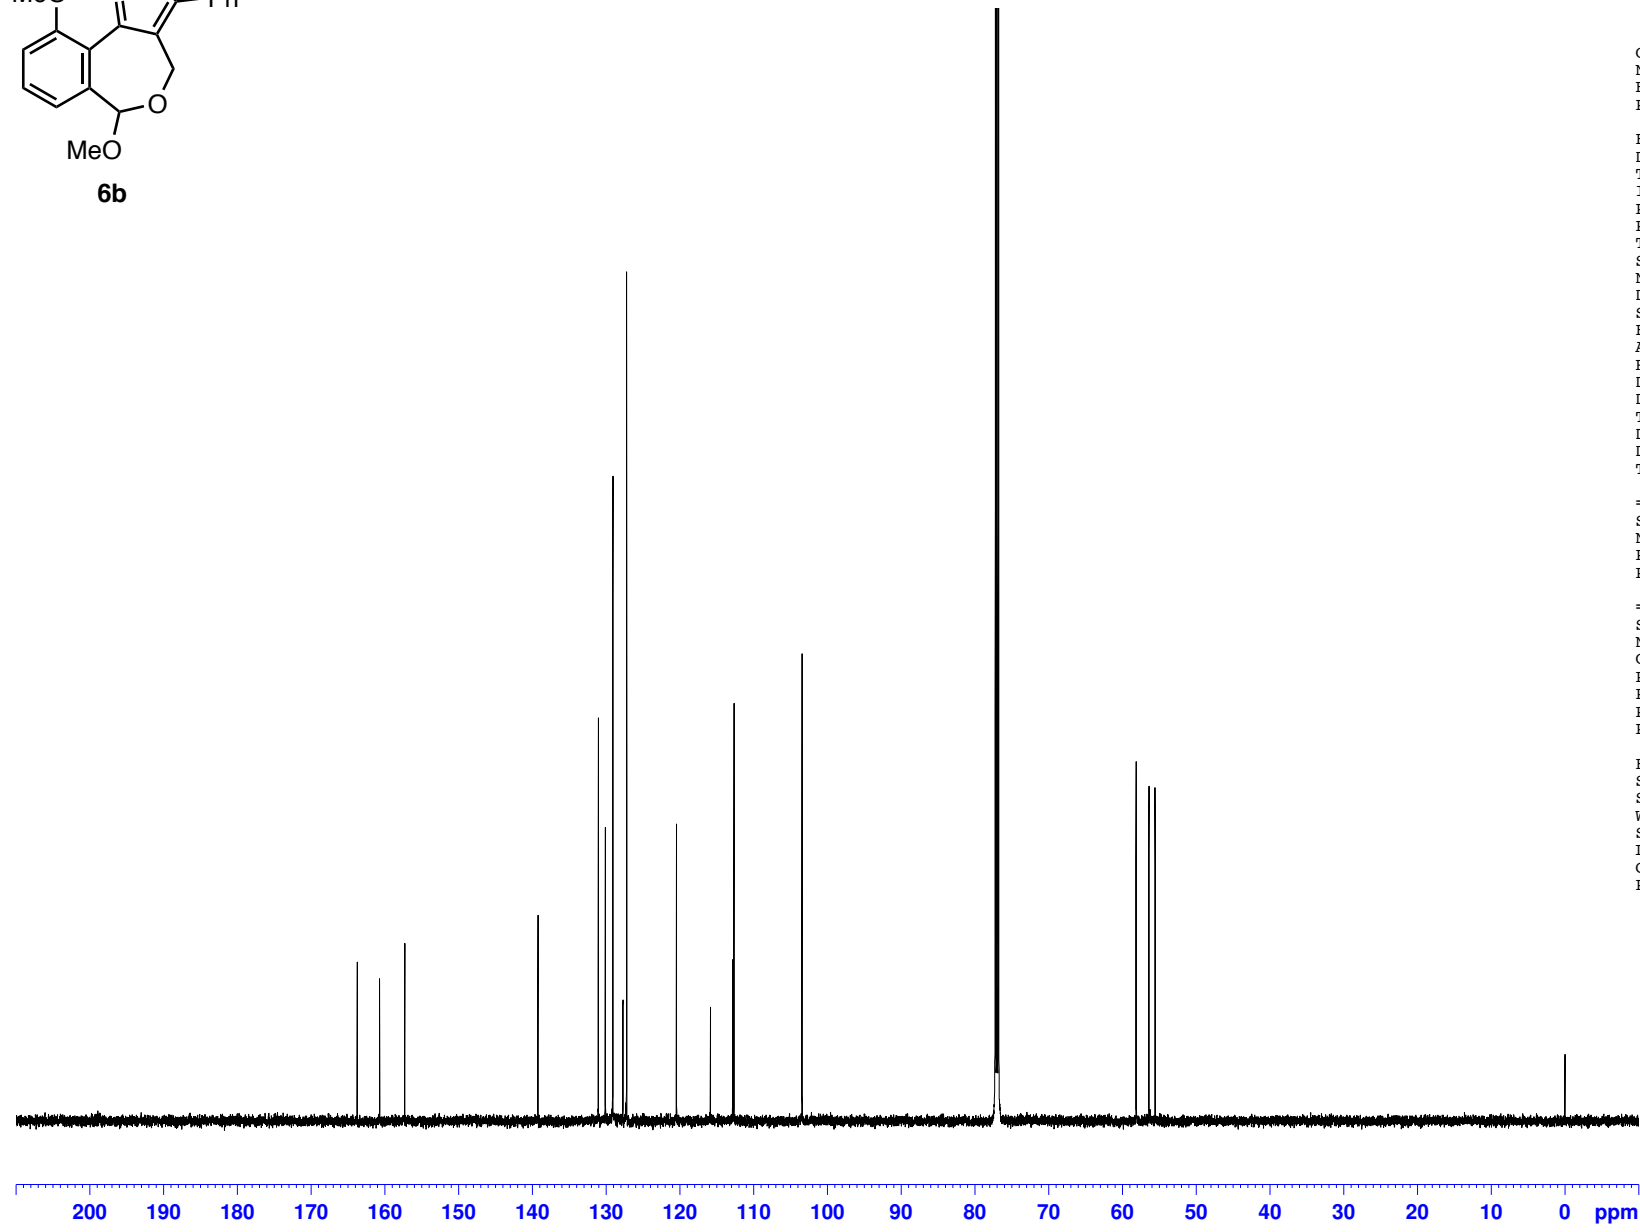

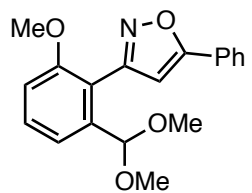

8



Current Data Parameters  
 NAME rs3 1H  
 EXPNO 10  
 PROCNO 1

F2 - Acquisition Parameters  
 Date\_ 20161126  
 Time\_ 18.23  
 INSTRUM spect  
 PROBHD 5 mm PABBO BB/  
 PULPROG zg30  
 TD 65536  
 SOLVENT CDC13  
 NS 16  
 DS 2  
 SWH 12019.230 Hz  
 FIDRES 0.183399 Hz  
 AQ 2.7262976 sec  
 RG 87.68  
 DW 41.600 use  
 DE 6.50 use  
 TE 298.0 K  
 D1 1.0000000 sec  
 TD0 1

==== CHANNEL f1 =====  
 SFO1 600.1337060 MHz  
 NUC1 1H  
 P1 12.00 use  
 PLW1 22.0000000 W

F2 - Processing parameters  
 SI 65536  
 SF 600.1300187 MHz  
 WDW EM  
 SSB 0  
 LB 0.30 Hz  
 GB 0  
 PC 1.00

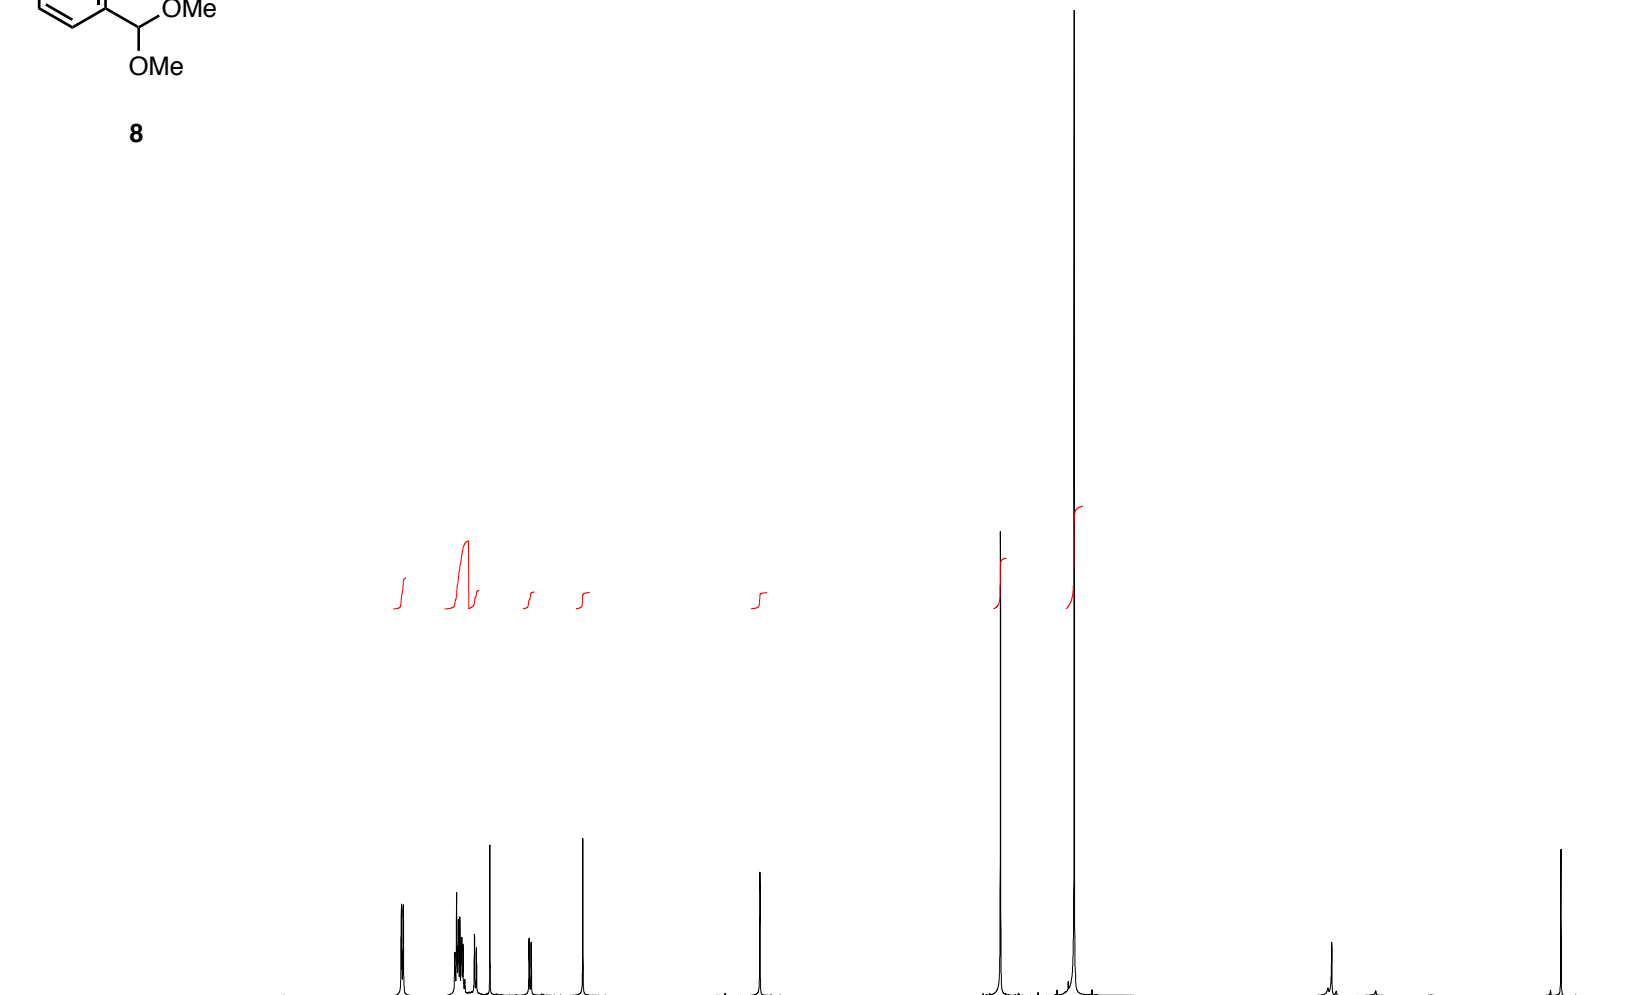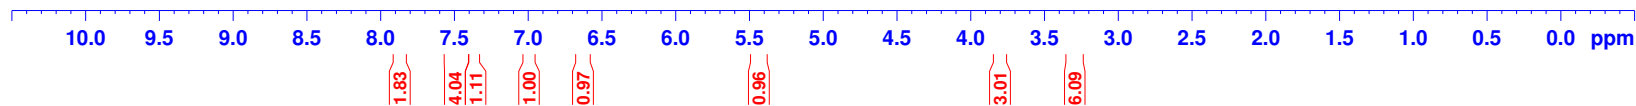



8

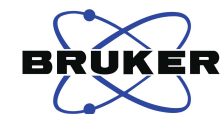

Current Data Parameters  
 NAME rs3 13C  
 EXPNO 10  
 PROCNO 1

F2 - Acquisition Parameters  
 Date\_ 20161127  
 Time\_ 23.53  
 INSTRUM spect  
 PROBHD 5 mm PABBO BB/  
 PULPROG zgpg30  
 TD 65536  
 SOLVENT CDCl3  
 NS 1024  
 DS 4  
 SWH 36057.691 Hz  
 FIDRES 0.550197 Hz  
 AQ 0.9087659 sec  
 RG 175.56  
 DW 13.867 use  
 DE 6.50 use  
 TE 298.0 K  
 D1 2.0000000 sec  
 D11 0.0300000 sec  
 TD0 1

==== CHANNEL f1 =====  
 SFO1 150.9178981 MHz  
 NUC1 13C  
 P1 11.00 use  
 PLW1 93.0000000 W

==== CHANNEL f2 =====  
 SFO2 600.1324005 MHz  
 NUC2 1H  
 CPDPRG[2] waltz16  
 PCPD2 70.00 use  
 PLW2 22.0000000 W  
 PLW12 0.64652997 W  
 PLW13 0.31680000 W

F2 - Processing parameters  
 SI 32768  
 SF 150.9028101 MHz  
 WDW EM  
 SSB 0  
 LB 1.00 Hz  
 GB 0  
 PC 1.40

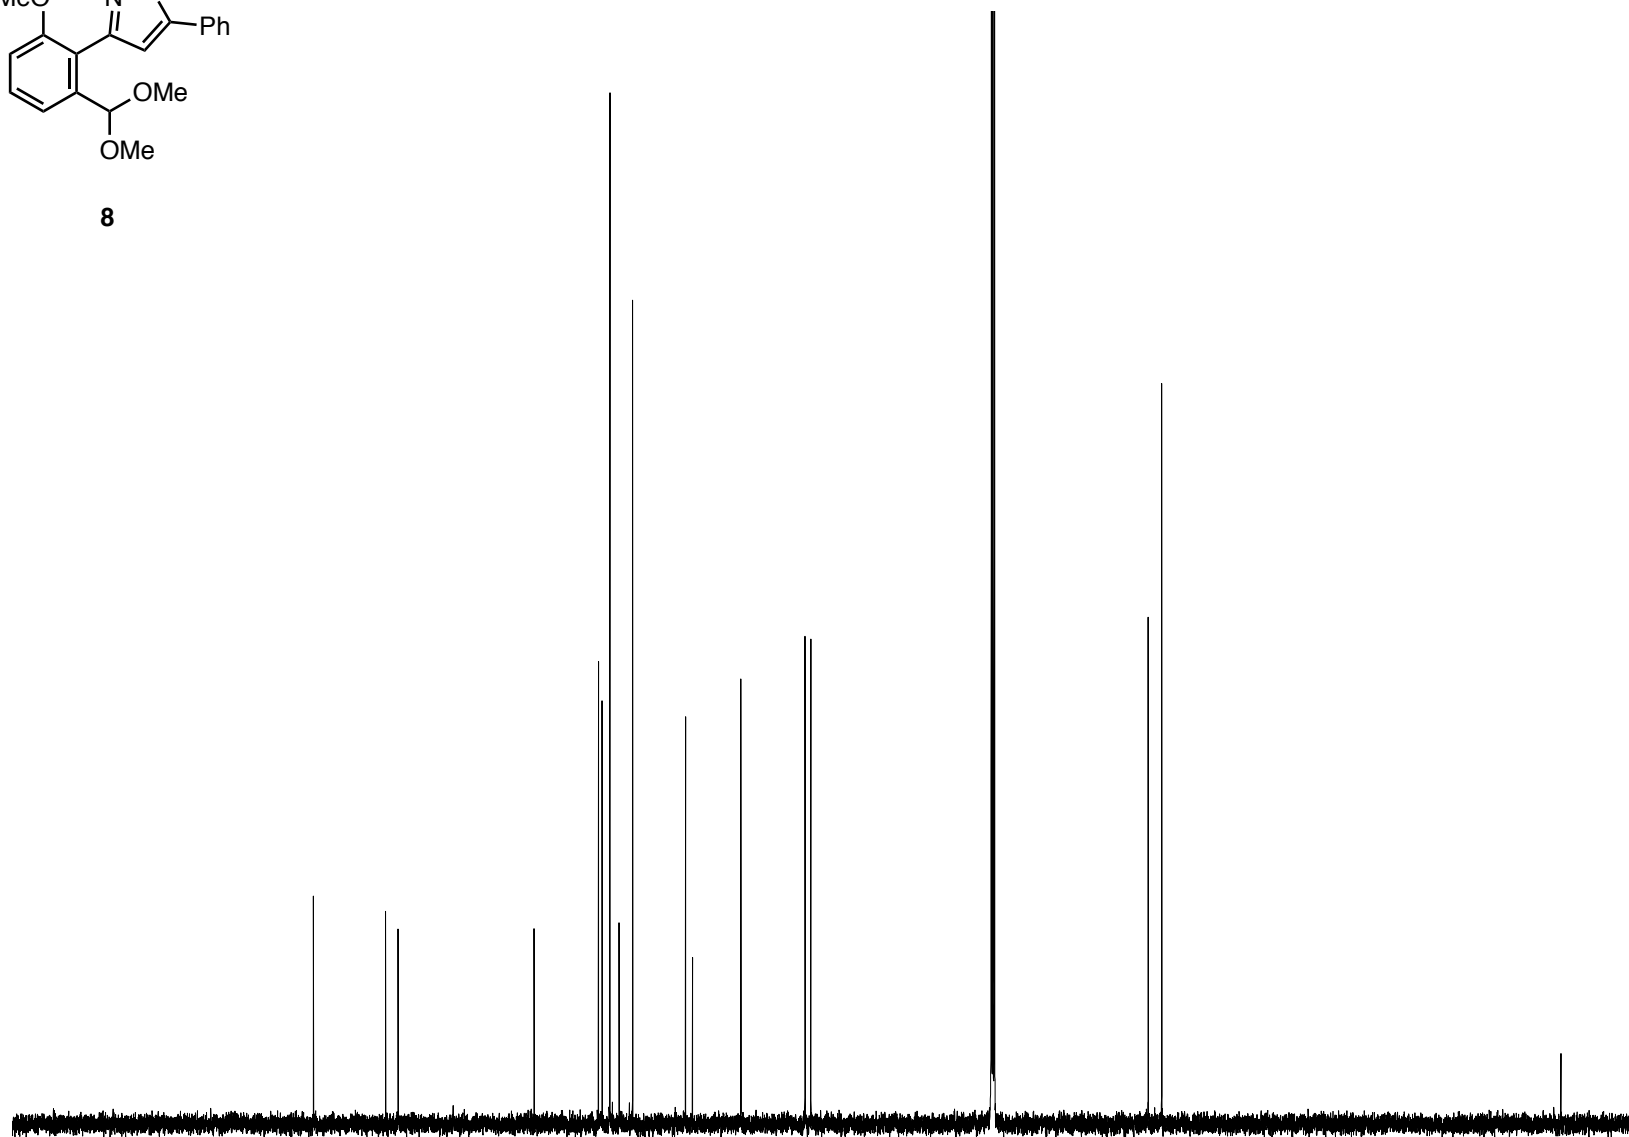

200 190 180 170 160 150 140 130 120 110 100 90 80 70 60 50 40 30 20 10 0 ppm
